# Supplementary material for: Classification of potential pathways affecting the VEGF pathway in glioblastoma multiforme (GBM) recurrent: A bioinformatics study based on differentially expressed- microRNAs
Source: Research Square preprint supplement (doi:10.21203/rs.3.rs-677315/v1), 2021-07-08
Supplement: Supplementary file 1 [file 2e7d0485a2d1e0bdf4d72f7b.xlsx]

## Sheet: Sheet1
Category	ID	Name	Source	p-value	q-value Bonferroni	q-value FDR B&H	q-value FDR B&Y	Hit Count in Query List	Hit Count in Genome	Hit in Query List
Pathway	83105	Pathways in cancer	KEGG	4.805e-97	1.221e-94	1.221e-94	7.465e-94	180	395	ERBB2,ABL1,MAX,ETS1,PLEKHG5,ADCY1,ADCY5,RXRG,ADCY8,FZD1,FZD7,MET,AGTR1,MITF,AKT1,AKT2,FGFR1,FGFR2,VEGFD,FOXO1,FLT3,FN1,FOS,PIK3R3,BIRC2,BIRC3,XIAP,BIRC5,FAS,FASLG,SKP2,AR,ARAF,RHOA,MTOR,GNA13,FZD2,SOS1,SOS2,MYC,BAD,CCND1,BCL2,BCL2L1,BCR,STAT1,STAT3,STAT5A,STAT5B,BMP4,BRAF,GLI1,RALBP1,GLI2,NFKB1,NFKBIA,PLCB1,GNA11,GNAI1,GNAI3,GNAQ,GNB2,NOS2,NRAS,NTRK1,CASP3,GRB2,ARHGEF12,CASP8,CASP9,CBL,CBLB,GSK3B…
Pathway	83048	MAPK signaling pathway	KEGG	7.334e-94	1.863e-91	9.314e-92	5.697e-91	144	255	MAPT,RPS6KA1,RPS6KA2,RPS6KA3,MAX,RRAS,MEF2C,MAP3K1,MAP3K3,MAP3K4,MAP3K5,MAPK12,MAP3K11,AKT1,AKT2,FGFR1,TAB1,FGFR2,FLNA,FLNC,RRAS2,MAP2K4,MRAS,FOS,FAS,FASLG,MKNK1,ARRB1,ARRB2,LAMTOR3,MAP3K2,SOS1,SOS2,MYC,SRF,BDNF,MAPK8IP3,STK3,NF1,BRAF,NFATC1,NFKB1,RPS6KA6,MAP3K7,CACNA1A,RPS6KA4,NRAS,NTRK1,NTRK2,MKNK2,CASP3,GRB2,TGFB1,PTPN5,DUSP16,PAK1,PAK2,DUSP10,TNFRSF1A,CDC25B,CDC42,TP53,RASGRP4,TRAF6,PDGFA,PDG…
Pathway	868085	Ras signaling pathway	KEGG	7.299e-82	1.854e-79	6.18e-80	3.78e-79	127	227	ABL1,ABL2,PAK4,ETS1,ETS2,RRAS,SHC3,BRAP,MET,AKT1,FOXO4,AKT2,FGFR1,FGFR2,VEGFD,RASAL1,RRAS2,FLT1,FLT4,MRAS,ANGPT1,ANGPT2,RASA3,PIK3R3,SHC1,SHC4,FASLG,ARF6,RHOA,LAT,EXOC2,GAB1,SOS1,SOS2,BAD,BCL2L1,RGL1,NF1,RALBP1,NFKB1,GNB2,NRAS,CALM1,CALM2,KSR2,GRB2,GRIN1,GRIN2A,TEK,TIAM1,RASSF1,PAK1,PAK2,PAK3,CDC42,HGF,RASGRP4,PDGFA,PDGFB,PDGFRA,PDGFRB,PGF,CHUK,SHC2,PIK3CA,PIK3CB,PIK3CD,PIK3R2,HRAS,PLA2G4A,PLCG1,…
Pathway	782000	Proteoglycans in cancer	KEGG	3.526e-81	8.955e-79	2.239e-79	1.369e-78	120	203	ERBB2,ERBB3,ERBB4,RPS6,ESR1,RPS6KB1,RPS6KB2,ACTB,RRAS,FZD1,FZD7,MET,MAPK12,AKT1,AKT2,FGFR1,SDC4,FLNA,FLNC,RRAS2,MRAS,FN1,PIK3R3,FAS,FASLG,ARAF,MSN,RHOA,SLC9A1,MTOR,FZD2,GAB1,SOS1,SOS2,MYC,PPP1R12A,SRC,CCND1,STAT3,IQGAP1,BRAF,GPC1,NRAS,CAMK2A,CAMK2B,CAMK2D,CAMK2G,CASP3,GRB2,ARHGEF12,CAV1,CAV2,CAV3,CBL,CBLB,TGFB1,THBS1,TIAM1,ARHGEF1,TLR2,TLR4,CD44,PAK1,CD63,CDC42,HCLS1,TP53,CDKN1A,HGF,HIF1A,PDPK1,C…
Pathway	83067	Focal adhesion	KEGG	6.129e-75	1.557e-72	3.113e-73	1.904e-72	114	199	ERBB2,PAK4,ACTB,ACTN4,ACTN1,SHC3,MET,MYL9,AKT1,AKT2,VAV3,VEGFD,FLNA,FLNC,FLT1,FLT4,FN1,PIK3R3,SHC1,SHC4,BIRC2,BIRC3,XIAP,RHOA,ARHGAP5,PARVA,FYN,SOS1,SOS2,PPP1R12A,SRC,BAD,CCND1,BCL2,BRAF,CAPN2,GRB2,RAPGEF1,CAV1,CAV2,CAV3,ARHGAP35,PIP5K1C,GSK3B,THBS1,TLN1,PAK1,PAK2,PAK3,CDC42,HGF,PDGFA,PDGFB,PDGFRA,PDGFRB,PDPK1,PGF,SHC2,PIK3CA,PIK3CB,PIK3CD,PIK3R2,HRAS,VASP,VAV1,VAV2,VCL,VEGFA,VEGFB,BCAR1,CRK,CRKL…
Pathway	83049	ErbB signaling pathway	KEGG	4.008e-72	1.018e-69	1.697e-70	1.038e-69	75	86	ERBB2,ERBB3,ERBB4,ABL1,ABL2,RPS6KB1,RPS6KB2,PAK4,SHC3,AKT1,AKT2,NCK2,MAP2K4,PIK3R3,SHC1,SHC4,ARAF,MTOR,GAB1,SOS1,SOS2,MYC,SRC,BAD,NCK1,STAT5A,STAT5B,BRAF,NRAS,CAMK2A,CAMK2B,CAMK2D,CAMK2G,GRB2,CBL,CBLB,GSK3B,PAK1,PAK2,PAK3,CDKN1A,CDKN1B,CBLC,SHC2,PIK3CA,PIK3CB,PIK3CD,PIK3R2,HRAS,PLCG1,PLCG2,NRG2,CRK,CRKL,PRKCA,PRKCB,PRKCG,MAPK1,MAPK3,MAPK8,MAPK9,MAPK10,MAP2K1,MAP2K2,MAP2K7,PAK6,PTK2,JUN,KRAS,RAF1,…
Pathway	692234	PI3K-Akt signaling pathway	KEGG	2.3e-66	5.842e-64	8.346e-65	5.105e-64	139	342	EPOR,RPS6,RPS6KB1,RPS6KB2,MCL1,MET,RPTOR,AKT1,AKT2,FGFR1,FGFR2,VEGFD,FOXO3,FLT1,FLT4,ANGPT1,ANGPT2,FN1,SGK1,PIK3R3,FASLG,THEM4,MTOR,SOS1,SOS2,MYC,BAD,CCND1,BCL2,BCL2L1,GH1,GHR,STK11,BRCA1,NFKB1,SYK,PHLPP1,YWHAQ,GNB2,MLST8,NOS3,NRAS,GRB2,CASP9,TEK,GSK3B,CDC37,THBS1,CD19,TLR2,TLR4,PIK3R5,TP53,CDK2,CDKN1A,CDKN1B,HGF,PDGFA,PDGFB,PDGFRA,PDGFRB,PDPK1,TSC1,TSC2,NR4A1,PGF,CHUK,PIK3CA,PIK3CB,PIK3CD,PIK3CG…
Pathway	868086	Rap1 signaling pathway	KEGG	1.656e-65	4.207e-63	5.258e-64	3.216e-63	109	210	ACTB,RRAS,ADCY1,ADCY5,ADCY8,MET,MAPK12,AKT1,AKT2,FGFR1,FGFR2,VEGFD,FLT1,FLT4,MRAS,ANGPT1,ANGPT2,PIK3R3,RHOA,RGS14,LAT,SRC,PARD6G,PARD6B,BRAF,PLCB1,GNAI1,GNAI3,GNAO1,GNAQ,NRAS,CALM1,CALM2,RAPGEF1,GRIN1,GRIN2A,TEK,THBS1,ARAP3,TIAM1,TLN1,PARD3,CDC42,CDH1,HGF,PDGFA,PDGFB,PDGFRA,PDGFRB,PGF,PIK3CA,PIK3CB,PIK3CD,PIK3R2,HRAS,PLCB2,PLCB3,PLCG1,VASP,VAV2,VEGFA,VEGFB,BCAR1,CRK,CRKL,MAPK14,IGF1R,CSF1R,PRKCA,…
Pathway	101143	Neurotrophin signaling pathway	KEGG	7.058e-65	1.793e-62	1.992e-63	1.218e-62	83	119	ABL1,MATK,RPS6KA1,RPS6KA2,RPS6KA3,SHC3,MAP3K1,MAP3K3,MAP3K5,MAPK12,AKT1,AKT2,FOXO3,PIK3R3,SHC1,SHC4,FASLG,RHOA,ARHGDIA,ARHGDIB,ARHGDIG,GAB1,SOS1,SOS2,BAD,BCL2,BDNF,BRAF,NFKB1,NFKBIA,RPS6KA6,NRAS,CALM1,CALM2,CAMK2A,CAMK2B,CAMK2D,NTRK1,CAMK2G,NTRK2,NTRK3,GRB2,RAPGEF1,GSK3B,CDC42,TP53,TRAF6,MAPKAPK2,PDPK1,SHC2,PIK3CA,PIK3CB,PIK3CD,PIK3R2,HRAS,PLCG1,PLCG2,YWHAE,CRK,CRKL,MAPK14,PRKCD,MAPK1,MAPK3,MAPK8…
Pathway	83089	Regulation of actin cytoskeleton	KEGG	2.605e-59	6.616e-57	6.616e-58	4.047e-57	104	212	PAK4,ACTB,ACTN4,ACTN1,RRAS,MYL9,FGD1,PIP5K1A,PIP5K1B,VAV3,FGFR1,FGFR2,BAIAP2,RRAS2,MRAS,FN1,GIT1,PIK3R3,ARAF,MSN,RHOA,SLC9A1,GNA13,SOS1,SOS2,NCKAP1,IQGAP2,BRK1,PPP1R12A,SRC,IQGAP1,BRAF,ARHGEF7,WASF1,WASL,NRAS,ARHGEF12,ARHGAP35,PIP5K1C,GSN,TIAM1,ARHGEF1,PAK1,PAK2,PAK3,CDC42,PDGFA,PDGFB,PDGFRA,PDGFRB,PIK3CA,PIK3CB,PIK3CD,PIK3R2,PIP4K2A,HRAS,IQGAP3,VAV1,VAV2,ARHGEF6,VCL,EZR,WAS,BCAR1,CRK,CRKL,PPP1CC…
Pathway	83080	T cell receptor signaling pathway	KEGG	5.599e-55	1.422e-52	1.293e-53	7.908e-53	71	103	PAK4,MAPK12,AKT1,AKT2,VAV3,NCK2,FOS,PIK3R3,RHOA,LAT,CARD11,FYN,SOS1,SOS2,NCK1,NFATC1,NFATC2,NFKB1,NFKBIA,MAP3K7,NRAS,GRB2,CBL,CBLB,GSK3B,CD28,PAK1,PAK2,PAK3,CDC42,PDPK1,CBLC,CHUK,PIK3CA,PIK3CB,PIK3CD,PIK3R2,HRAS,PLCG1,VAV1,VAV2,MAP3K8,ZAP70,MAPK14,PPP3CA,PPP3CB,PPP3CC,PPP3R1,PRKCQ,MAPK1,MAPK3,IKBKB,MAPK11,MAPK9,MAPK13,MAP2K1,MAP2K2,MAP2K7,IL4,PAK6,ITK,JUN,PTPN6,KRAS,RAF1,AKT3,PAK5,RELA,LCK,LCP2,R…
Pathway	1404798	EGFR tyrosine kinase inhibitor resistance	KEGG	5.356e-54	1.36e-51	1.134e-52	6.934e-52	62	79	ERBB2,ERBB3,RPS6,RPS6KB1,RPS6KB2,SHC3,MET,AKT1,AKT2,FGFR2,FOXO3,PIK3R3,SHC1,SHC4,ARAF,MTOR,GAB1,SOS1,SOS2,SRC,BAD,BCL2,BCL2L1,STAT3,NF1,BRAF,NRAS,GRB2,GSK3B,HGF,PDGFA,PDGFB,PDGFRA,PDGFRB,SHC2,PIK3CA,PIK3CB,PIK3CD,PIK3R2,HRAS,PLCG1,PLCG2,VEGFA,NRG2,IGF1R,PRKCA,PRKCB,PRKCG,MAPK1,MAPK3,MAP2K1,MAP2K2,PTEN,JAK1,JAK2,KDR,KRAS,RAF1,AKT3,BCL2L11,EGFR,EIF4EBP1
Pathway	694606	Hepatitis B	KEGG	3.903e-51	9.915e-49	7.627e-50	4.665e-49	80	144	MAP3K1,PTK2B,AKT1,AKT2,MAP2K4,FOS,PIK3R3,APAF1,BIRC5,FAS,FASLG,MYC,MYD88,SRC,BAD,CCND1,BCL2,STAT1,STAT3,STAT4,STAT5A,STAT5B,STAT6,NFATC1,NFATC2,NFATC4,NFKB1,NFKBIA,YWHAQ,NRAS,CASP3,GRB2,CASP8,CASP9,TGFB1,TLR2,TLR3,TLR4,CYCS,TP53,CDK2,CDKN1A,CDKN1B,CHUK,PIK3CA,PIK3CB,PIK3CD,PIK3R2,HRAS,HSPG2,YWHAB,CREB1,ATF2,CREBBP,YWHAZ,CREB5,PRKCA,PRKCB,PRKCG,MAPK1,MAPK3,MAPK8,IKBKB,MAPK9,MAPK10,MAP2K1,MAP2K2,PT…
Pathway	83090	Insulin signaling pathway	KEGG	1.212e-50	3.079e-48	2.199e-49	1.345e-48	78	138	RPS6,RPS6KB1,RPS6KB2,SHC3,RPTOR,AKT1,AKT2,FOXO1,IRS4,PIK3R3,SHC1,SHC4,SORBS1,ARAF,SLC2A4,MKNK1,MTOR,IRS2,SOS1,SOS2,BAD,SREBF1,PPARGC1A,BRAF,EXOC7,NRAS,CALM1,CALM2,MKNK2,SOCS3,GRB2,RAPGEF1,CBL,CBLB,GSK3B,RHOQ,PDE3B,PDPK1,CBLC,TSC1,TSC2,TRIP10,SHC2,PIK3CA,PIK3CB,PIK3CD,PIK3R2,HRAS,CRK,CRKL,PPP1CC,PRKACA,PRKACB,PRKACG,PRKAR1A,PRKAR1B,PRKAR2A,PRKAR2B,PRKCI,PRKCZ,MAPK1,MAPK3,MAPK8,IKBKB,MAPK9,MAPK10,M…
Pathway	83065	Axon guidance	KEGG	3.926e-49	9.972e-47	6.648e-48	4.066e-47	86	175	EPHB2,EPHB3,EPHB4,ABL1,PAK4,RRAS,MET,SRGAP1,NCK2,PIK3R3,RHOA,FYN,EPHA6,SRC,PARD6G,NCK1,NRP1,PARD6B,NFATC2,NFATC4,GNAI1,GNAI3,NRAS,CAMK2A,CAMK2B,CAMK2D,CAMK2G,ARHGEF12,GSK3B,PAK1,PAK2,PAK3,PARD3,CDC42,CDK5,TRPC6,SLIT2,PIK3CA,PIK3CB,PIK3CD,PIK3R2,NGEF,HRAS,PLCG1,PLCG2,PLXNA1,PLXNB1,WNT5A,PPP3CA,PPP3CB,PPP3CC,PPP3R1,PLXNA4,PRKCA,PRKCZ,MAPK1,MAPK3,ILK,PAK6,DCC,ITGB1,PTK2,PTPN11,PARD6A,SRGAP3,RAC1,RAC…
Pathway	83066	VEGF signaling pathway	KEGG	8.607e-49	2.186e-46	1.366e-47	8.357e-47	51	59	MAPK12,AKT1,AKT2,PIK3R3,SRC,BAD,NFATC2,SPHK1,NOS3,NRAS,CASP9,SH2D2A,CDC42,MAPKAPK2,SHC2,PIK3CA,PIK3CB,PIK3CD,PIK3R2,HRAS,PLA2G4A,PLCG1,PLCG2,HSPB1,VEGFA,MAPK14,PPP3CA,PPP3CB,PPP3CC,PPP3R1,PRKCA,PRKCB,PRKCG,MAPK1,MAPK3,MAPK11,MAPK13,MAP2K1,MAP2K2,SPHK2,PTGS2,PTK2,MAPKAPK3,PXN,KDR,RAC1,RAC2,RAC3,KRAS,RAF1,AKT3
Pathway	1144995	Sphingolipid signaling pathway	KEGG	1.674e-47	4.251e-45	2.501e-46	1.53e-45	70	118	MAP3K5,MAPK12,AKT1,AKT2,PIK3R3,RHOA,GNA13,FYN,BCL2,SPHK1,SGPL1,NFKB1,PLCB1,GNAI1,GNAI3,GNAQ,NOS3,NRAS,TNFRSF1A,TP53,PDPK1,PIK3CA,PIK3CB,PIK3CD,PIK3R2,HRAS,PLCB2,PLCB3,PLD1,PLD2,SGPP2,PPP2CA,PPP2CB,PPP2R1A,PPP2R1B,PPP2R2A,PPP2R2B,PPP2R2C,PPP2R3A,PPP2R5A,PPP2R5C,MAPK14,PPP2R5D,PRKCA,PRKCB,PRKCE,PRKCG,PRKCZ,MAPK1,MAPK3,MAPK8,MAPK11,MAPK9,MAPK10,MAPK13,MAP2K1,MAP2K2,SPHK2,PTEN,GAB2,SGPP1,RAC1,RAC2,RA…
Pathway	114228	Fc gamma R-mediated phagocytosis	KEGG	3.481e-46	8.843e-44	4.913e-45	3.005e-44	61	91	RPS6KB1,RPS6KB2,NCF1,PIP5K1A,PIP5K1B,AKT1,AKT2,VAV3,PIK3R3,ARF6,LAT,PLPP1,PLPP2,PLPP3,ASAP2,SPHK1,SYK,WASF1,WASL,PIP5K1C,GSN,PAK1,CDC42,HCK,PIK3CA,PIK3CB,PIK3CD,PIK3R2,PLA2G4A,PLCG1,PLCG2,PLD1,PLD2,VASP,VAV1,VAV2,WAS,CRK,CRKL,PRKCA,PRKCB,PRKCD,PRKCE,PRKCG,MAPK1,MAPK3,MAP2K1,SPHK2,INPP5D,INPPL1,GAB2,ASAP1,RAC1,RAC2,DNM2,DOCK2,RAF1,AKT3,ARPC5,LIMK2,LYN
Pathway	1311074	Phospholipase D signaling pathway	KEGG	7.857e-46	1.996e-43	1.05e-44	6.424e-44	76	146	RRAS,ADCY1,SHC3,ADCY5,ADCY8,PTK2B,AGTR1,PIP5K1A,PIP5K1B,AKT1,AKT2,RRAS2,MRAS,PIK3R3,SHC1,SHC4,DGKZ,ARF1,ARF6,RHOA,PLPP1,PLPP2,PLPP3,MTOR,GNA13,FYN,GAB1,SOS1,SOS2,SPHK1,SYK,PLCB1,NRAS,GRB2,PIP5K1C,PIK3R5,PDGFA,PDGFB,PDGFRA,PDGFRB,TSC1,TSC2,SHC2,PIK3CA,PIK3CB,PIK3CD,PIK3CG,PIK3R2,HRAS,PLA2G4A,PLCB2,PLCB3,PLCG1,PLCG2,PLD1,PLD2,PRKCA,MAPK1,MAPK3,MAP2K1,MAP2K2,SPHK2,INSR,GAB2,PTPN11,DNM1,KIT,DNM2,KRAS…
Pathway	1404799	Endocrine resistance	KEGG	2.009e-45	5.104e-43	2.552e-44	1.561e-43	62	96	NCOA3,ERBB2,ESR1,ESR2,RPS6KB1,RPS6KB2,ADCY1,SHC3,ADCY5,ADCY8,MAPK12,AKT1,AKT2,CARM1,FOS,PIK3R3,SHC1,SHC4,ARAF,MTOR,SOS1,SOS2,SP1,SRC,BAD,CCND1,BCL2,BRAF,NOTCH1,NRAS,GRB2,TP53,CDKN1A,CDKN1B,SHC2,PIK3CA,PIK3CB,PIK3CD,PIK3R2,HRAS,MAPK14,IGF1R,PRKACA,PRKACB,PRKACG,MAPK1,MAPK3,MAPK8,MAPK11,MAPK9,MAPK10,MAPK13,MAP2K1,MAP2K2,PTK2,JUN,KRAS,RAF1,AKT3,RB1,E2F1,EGFR
Pathway	99051	Chemokine signaling pathway	KEGG	2.96e-45	7.518e-43	3.58e-44	2.19e-43	84	182	NCF1,ADCY1,SHC3,ADCY5,ADCY8,PTK2B,GRK2,AKT1,AKT2,VAV3,FGR,FOXO3,PIK3R3,SHC1,SHC4,RHOA,ARRB1,ARRB2,SOS1,SOS2,SRC,STAT1,STAT3,STAT5B,BRAF,NFKB1,NFKBIA,PLCB1,GNAI1,GNAI3,GNB2,WASL,NRAS,GRB2,GSK3A,GSK3B,TIAM1,PAK1,PARD3,CDC42,HCK,CHUK,SHC2,PIK3CA,PIK3CB,PIK3CD,PIK3R2,HRAS,PLCB2,PLCB3,VAV1,VAV2,WAS,BCAR1,CRK,CRKL,PRKACA,PRKACB,PRKACG,PRKCB,PRKCD,PRKCZ,MAPK1,MAPK3,IKBKB,MAP2K1,PTK2,ELMO1,ITK,JAK2,JAK3,…
Pathway	83111	Prostate cancer	KEGG	3.733e-45	9.482e-43	4.31e-44	2.636e-43	59	87	ERBB2,AKT1,AKT2,FGFR1,FGFR2,FOXO1,PIK3R3,AR,ARAF,MTOR,SOS1,SOS2,BAD,CCND1,BCL2,BRAF,NFKB1,NFKBIA,NRAS,GRB2,CASP9,GSK3B,TP53,CDK2,CDKN1A,CDKN1B,PDGFA,PDGFB,PDGFRA,PDGFRB,PDPK1,CHUK,PIK3CA,PIK3CB,PIK3CD,PIK3R2,HRAS,HSP90AA1,HSP90AB1,CREB1,CREBBP,CREB5,IGF1R,MAPK1,MAPK3,CTNNB1,IKBKB,MAP2K1,MAP2K2,INSRR,PTEN,KRAS,RAF1,AKT3,RB1,E2F1,RELA,EGFR,EP300
Pathway	83082	Fc epsilon RI signaling pathway	KEGG	2.309e-44	5.865e-42	2.55e-43	1.56e-42	52	68	MAPK12,AKT1,AKT2,VAV3,ALOX5,MAP2K4,PIK3R3,LAT,FYN,SOS1,SOS2,BTK,SYK,NRAS,GRB2,PDPK1,PIK3CA,PIK3CB,PIK3CD,PIK3R2,HRAS,PLA2G4A,PLCG1,PLCG2,VAV1,VAV2,MAPK14,PRKCA,MAPK1,MAPK3,MAPK8,MAPK11,MAPK9,MAPK10,MAPK13,MAP2K1,MAP2K2,MAP2K3,MAP2K6,MAP2K7,IL3,IL4,INPP5D,GAB2,RAC1,RAC2,RAC3,KRAS,RAF1,AKT3,LCP2,LYN
Pathway	83116	Chronic myeloid leukemia	KEGG	3.101e-44	7.878e-42	3.282e-43	2.008e-42	53	71	ABL1,SHC3,AKT1,AKT2,PIK3R3,SHC1,SHC4,ARAF,SOS1,SOS2,MYC,BAD,CCND1,BCL2L1,BCR,STAT5A,STAT5B,BRAF,NFKB1,NFKBIA,NRAS,GRB2,CBL,CBLB,TGFB1,TP53,CDKN1A,CDKN1B,CBLC,CHUK,SHC2,PIK3CA,PIK3CB,PIK3CD,PIK3R2,HRAS,CRK,CRKL,MAPK1,MAPK3,IKBKB,MAP2K1,MAP2K2,GAB2,PTPN11,KRAS,RAF1,AKT3,RB1,E2F1,RELA,SMAD3,SMAD4
Pathway	1319988	AGE-RAGE signaling pathway in diabetic complications	KEGG	3.242e-44	8.234e-42	3.294e-43	2.015e-42	62	99	MAPK12,AGTR1,AKT1,AKT2,VEGFD,FOXO1,FN1,PIK3R3,CCND1,BCL2,STAT1,STAT3,STAT5A,STAT5B,NFATC1,NFKB1,PLCB1,NOS3,NRAS,CASP3,PLCD4,TGFB1,CDC42,CDKN1B,PIK3CA,PIK3CB,PIM1,PIK3CD,PIK3R2,HRAS,PLCB2,PLCB3,PLCD1,PLCG1,PLCG2,VCAM1,VEGFA,VEGFB,MAPK14,PRKCA,PRKCB,PRKCD,PRKCE,PRKCZ,MAPK1,MAPK3,MAPK8,MAPK11,MAPK9,MAPK10,MAPK13,CYBB,JAK2,JUN,RAC1,KRAS,AKT3,RELA,EGR1,SMAD2,SMAD3,SMAD4
Pathway	193147	Osteoclast differentiation	KEGG	1.413e-43	3.588e-41	1.38e-42	8.441e-42	70	130	NCF1,SIRPG,MAPK12,MITF,AKT1,AKT2,TAB1,FOS,FOSB,FOSL2,PIK3R3,TNFSF11,FYN,NCF2,NCF4,TNFRSF11A,STAT1,NFATC1,NFATC2,NFKB1,BTK,NFKBIA,SYK,MAP3K7,SOCS3,GRB2,TGFB1,TNFRSF1A,TRAF6,BLNK,CHUK,TYK2,PIK3CA,PIK3CB,PIK3CD,PIK3R2,PLCG2,CREB1,MAPK14,PPP3CA,PPP3CB,CSF1R,PPP3CC,PPP3R1,MAPK1,MAPK3,MAPK8,IKBKB,MAPK11,MAPK9,MAPK10,MAPK13,MAP2K1,MAP2K6,MAP2K7,CYBA,CYBB,CYLD,GAB2,JAK1,JUN,JUNB,JUND,RAC1,AKT3,RELA,RELB,…
Pathway	83110	Glioma	KEGG	6.678e-42	1.696e-39	6.058e-41	3.705e-40	49	64	SHC3,AKT1,AKT2,PIK3R3,SHC1,SHC4,ARAF,MTOR,SOS1,SOS2,CCND1,BRAF,NRAS,CALM1,CALM2,CAMK2A,CAMK2B,CAMK2D,CAMK2G,GRB2,TP53,CDKN1A,PDGFA,PDGFB,PDGFRA,PDGFRB,SHC2,PIK3CA,PIK3CB,PIK3CD,PIK3R2,HRAS,PLCG1,PLCG2,IGF1R,PRKCA,PRKCB,PRKCG,MAPK1,MAPK3,MAP2K1,MAP2K2,PTEN,KRAS,RAF1,AKT3,RB1,E2F1,EGFR
Pathway	83108	Pancreatic cancer	KEGG	6.678e-42	1.696e-39	6.058e-41	3.705e-40	49	64	ERBB2,AKT1,AKT2,PIK3R3,ARAF,BAD,CCND1,BCL2L1,STAT1,STAT3,BRAF,RALBP1,NFKB1,CASP9,TGFB1,CDC42,TP53,CHUK,PIK3CA,PIK3CB,PIK3CD,PIK3R2,PLD1,ARHGEF6,VEGFA,MAPK1,MAPK3,MAPK8,IKBKB,MAPK9,MAPK10,MAP2K1,JAK1,RAC1,RAC2,RAC3,KRAS,RAF1,RALA,RALB,RALGDS,AKT3,RB1,E2F1,RELA,EGFR,SMAD2,SMAD3,SMAD4
Pathway	1059539	Choline metabolism in cancer	KEGG	1.326e-41	3.369e-39	1.162e-40	7.105e-40	60	99	RPS6KB1,RPS6KB2,PIP5K1A,PIP5K1B,AKT1,AKT2,FOS,PIK3R3,DGKZ,PLPP1,PLPP2,PLPP3,MTOR,SOS1,SOS2,SP1,WASF1,WASL,NRAS,GRB2,PIP5K1C,HIF1A,PDGFA,PDGFB,PDGFRA,PDGFRB,PDPK1,TSC1,TSC2,PIK3CA,PIK3CB,PIK3CD,PIK3R2,HRAS,PLA2G4A,PLCG1,PLD1,PLD2,WAS,PRKCA,PRKCB,PRKCG,MAPK1,MAPK3,MAPK8,MAPK9,MAPK10,MAP2K1,MAP2K2,JUN,RAC1,RAC2,RAC3,KRAS,RAF1,RALGDS,AKT3,RHEB,EGFR,EIF4EBP1
Pathway	83081	B cell receptor signaling pathway	KEGG	3.547e-41	9.009e-39	3.003e-40	1.837e-39	51	71	AKT1,AKT2,VAV3,FOS,PIK3R3,DAPP1,CARD11,SOS1,SOS2,NFATC1,NFATC2,NFKB1,BTK,NFKBIA,SYK,NRAS,GRB2,GSK3B,CD19,BLNK,CHUK,PIK3CA,PIK3CB,PIK3CD,PIK3R2,HRAS,PLCG2,VAV1,VAV2,PPP3CA,PPP3CB,PPP3CC,PPP3R1,PRKCB,MAPK1,MAPK3,IKBKB,MAP2K1,MAP2K2,INPP5D,INPPL1,JUN,PTPN6,RAC1,RAC2,RAC3,KRAS,RAF1,AKT3,RELA,LYN
Pathway	83091	GnRH signaling pathway	KEGG	2.438e-40	6.193e-38	1.998e-39	1.222e-38	57	92	ADCY1,ADCY5,ADCY8,MAP3K1,MAP3K3,MAP3K4,PTK2B,MAPK12,MAP2K4,MAP3K2,SOS1,SOS2,SRC,PLCB1,GNA11,GNAQ,NRAS,CALM1,CALM2,CAMK2A,CAMK2B,CAMK2D,CAMK2G,GRB2,CDC42,HRAS,PLA2G4A,PLCB2,PLCB3,PLD1,PLD2,MAPK14,PRKACA,PRKACB,PRKACG,PRKCA,PRKCB,PRKCD,MAPK1,MAPK3,MAPK8,MAPK11,MAPK9,MAPK10,MAPK13,MAP2K1,MAP2K2,MAP2K3,MAP2K6,MAP2K7,ITPR1,ITPR3,JUN,KRAS,RAF1,EGFR,ELK1
Pathway	373901	HTLV-I infection	KEGG	1.606e-38	4.08e-36	1.275e-37	7.798e-37	92	256	ETS1,ETS2,RRAS,ADCY1,ADCY5,ADCY8,MAP3K1,MAP3K3,FZD1,FZD7,AKT1,AKT2,RRAS2,MAP2K4,MRAS,KAT5,FOS,PIK3R3,XIAP,FZD2,MYC,SRF,CCND1,BCL2L1,STAT5A,STAT5B,NRP1,KAT2B,NFATC1,NFATC2,NFATC4,NFKB1,NFKBIA,TCF3,NRAS,TERT,GSK3B,TGFB1,TLN1,TNFRSF1A,TP53,CDKN1A,PDGFA,PDGFB,PDGFRA,PDGFRB,CHEK1,CHUK,PIK3CA,PIK3CB,PIK3CD,PIK3R2,HRAS,VCAM1,WNT1,WNT5A,WNT11,CREB1,ATF2,CREBBP,PPP3CA,PPP3CB,PPP3CC,PPP3R1,PRKACA,PRKACB,PR…
Pathway	921162	FoxO signaling pathway	KEGG	1.862e-38	4.729e-36	1.433e-37	8.765e-37	66	132	MAPK12,AKT1,FOXO4,AKT2,FOXG1,FOXO1,FOXO3,IRS4,FOXO6,SGK1,PIK3R3,FASLG,SKP2,ARAF,SLC2A4,IRS2,SOD2,SOS1,SOS2,CCND1,STAT3,STK11,BRAF,NRAS,GRB2,SIRT1,CCNB1,TGFB1,CDK2,CDKN1A,CDKN1B,PDPK1,CHUK,PIK3CA,PIK3CB,PIK3CD,PIK3R2,HRAS,PLK1,CREBBP,MAPK14,IGF1R,MAPK1,MAPK3,MAPK8,IKBKB,MAPK11,MAPK9,MAPK10,MAPK13,MAP2K1,MAP2K2,INSR,IRS1,PTEN,GADD45A,KRAS,RAF1,AKT3,BCL2L11,S1PR1,EGFR,EP300,SMAD2,SMAD3,SMAD4
Pathway	83107	Renal cell carcinoma	KEGG	3.025e-38	7.684e-36	2.26e-37	1.382e-36	47	65	PAK4,ETS1,MET,AKT1,AKT2,PIK3R3,ARAF,GAB1,SOS1,SOS2,BRAF,NRAS,GRB2,RAPGEF1,TGFB1,PAK1,PAK2,PAK3,CDC42,HGF,HIF1A,PDGFB,PIK3CA,PIK3CB,PIK3CD,PIK3R2,HRAS,VEGFA,CREBBP,CRK,CRKL,MAPK1,MAPK3,MAP2K1,MAP2K2,PAK6,JUN,PTPN11,RAC1,KRAS,RAF1,AKT3,RAP1A,RAP1B,PAK5,EP300,EPAS1
Pathway	1474302	Fluid shear stress and atherosclerosis	KEGG	4.755e-38	1.208e-35	3.451e-37	2.111e-36	68	142	NCF1,ACTB,MEF2A,MEF2C,MAP3K5,MAPK12,AKT1,AKT2,SDC4,MAP2K4,FOS,PIK3R3,RHOA,SRC,NCF2,BCL2,BMP4,NFE2L2,NFKB1,MAP3K7,NOS3,GPC1,CALM1,CALM2,CAV1,CAV2,CAV3,TNFRSF1A,ARHGEF2,CDH5,TP53,PDGFA,PDGFB,HMOX1,CHUK,PIK3CA,PIK3CB,PIK3CD,PIK3R2,VCAM1,HSP90AA1,VEGFA,HSP90AB1,MAPK14,PRKCZ,CTNNB1,MAPK8,IKBKB,MAPK11,MAPK9,MAPK10,MAPK13,MAP2K6,MAP2K7,CYBA,CYBB,ITGA2B,ITGAV,PTK2,JUN,KDR,RAC1,RAC2,RAC3,AKT3,DUSP1,RELA,T…
Pathway	83119	Non-small cell lung cancer	KEGG	2.029e-37	5.153e-35	1.431e-36	8.755e-36	44	58	ERBB2,RXRG,AKT1,AKT2,FHIT,ALK,FOXO3,PIK3R3,ARAF,SOS1,SOS2,BAD,CCND1,STAT3,STAT5A,STAT5B,BRAF,NRAS,GRB2,CASP9,RASSF1,TP53,PDPK1,PIK3CA,PIK3CB,PIK3CD,PIK3R2,HRAS,PLCG1,PLCG2,PRKCA,PRKCB,PRKCG,MAPK1,MAPK3,MAP2K1,MAP2K2,JAK3,KRAS,RAF1,AKT3,RB1,E2F1,EGFR
Pathway	946598	Thyroid hormone signaling pathway	KEGG	2.812e-37	7.143e-35	1.93e-36	1.181e-35	61	116	NCOA3,ESR1,ACTB,RXRG,AKT1,AKT2,FOXO1,PIK3R3,SLC9A1,MTOR,ATP1A1,MYC,SRC,BAD,CCND1,STAT1,BMP4,KAT2B,PLCB1,NOTCH1,NRAS,CASP9,PLCD4,GSK3B,TP53,HIF1A,PDPK1,TSC2,PFKFB2,PIK3CA,PIK3CB,PIK3CD,PIK3R2,HRAS,PLCB2,PLCB3,PLCD1,PLCG1,PLCG2,CREBBP,PRKACA,PRKACB,PRKACG,PRKCA,PRKCB,PRKCG,MAPK1,MAPK3,CTNNB1,MAP2K1,MAP2K2,ITGAV,TBC1D4,KRAS,RAF1,PLCZ1,AKT3,RCAN1,RHEB,EP300,RCAN2
Pathway	799177	Estrogen signaling pathway	KEGG	6.223e-37	1.581e-34	4.159e-36	2.544e-35	56	98	ESR1,ESR2,ADCY1,SHC3,ADCY5,ADCY8,AKT1,AKT2,FOS,PIK3R3,SHC1,SHC4,SOS1,SOS2,SP1,SRC,PLCB1,GNAI1,GNAI3,GNAO1,GNAQ,NOS3,NRAS,CALM1,CALM2,GRB2,SHC2,PIK3CA,PIK3CB,PIK3CD,PIK3R2,HRAS,PLCB2,PLCB3,HSPA6,HSPA8,HSP90AA1,HSP90AB1,CREB1,ATF2,CREB5,PRKACA,PRKACB,PRKACG,PRKCD,MAPK1,MAPK3,MAP2K1,MAP2K2,ITPR1,ITPR3,JUN,KRAS,RAF1,AKT3,EGFR
Pathway	814182	Prolactin signaling pathway	KEGG	7.462e-36	1.895e-33	4.767e-35	2.916e-34	47	70	ESR1,ESR2,SHC3,MAPK12,AKT1,AKT2,FOXO3,FOS,PIK3R3,SHC1,SHC4,TNFSF11,SOS1,SOS2,SRC,CCND1,TNFRSF11A,STAT1,STAT3,STAT5A,STAT5B,NFKB1,NRAS,SOCS3,GRB2,GSK3B,SHC2,PIK3CA,PIK3CB,PIK3CD,PIK3R2,HRAS,MAPK14,MAPK1,MAPK3,MAPK8,MAPK11,MAPK9,MAPK10,MAPK13,MAP2K1,MAP2K2,JAK2,KRAS,RAF1,AKT3,RELA
Pathway	83060	Apoptosis	KEGG	7.508e-36	1.907e-33	4.767e-35	2.916e-34	65	138	ACTB,MCL1,MAP3K5,AKT1,AKT2,FOS,PIK3R3,APAF1,BIRC2,BIRC3,XIAP,BIRC5,FAS,FASLG,RIPK1,SPTAN1,BAD,BCL2,BCL2L1,NFKB1,NFKBIA,NRAS,HTRA2,NTRK1,CAPN1,CAPN2,CASP3,CASP7,CASP8,CASP9,CYCS,TNFRSF1A,TP53,TRAF1,PDPK1,CHUK,PIK3CA,PIK3CB,PIK3CD,PIK3R2,HRAS,DIABLO,CSF2RB,MAPK1,MAPK3,MAPK8,IKBKB,MAPK9,MAPK10,MAP2K1,MAP2K2,IL3,DAB2IP,DAXX,GADD45A,DDIT3,ITPR1,ITPR3,JUN,PTPN13,KRAS,RAF1,AKT3,BCL2L11,RELA
Pathway	83085	Long-term potentiation	KEGG	8.46e-36	2.149e-33	5.241e-35	3.206e-34	46	67	RPS6KA1,RPS6KA2,RPS6KA3,ADCY1,ADCY8,ARAF,BRAF,RPS6KA6,PLCB1,GNAQ,NRAS,CALM1,CALM2,CAMK2A,CAMK2B,CAMK2D,CAMK2G,GRIN1,GRIN2A,GRIN2D,HRAS,PLCB2,PLCB3,CREBBP,PPP1CC,PPP3CA,PPP3CB,PPP3CC,PPP3R1,PRKACA,PRKACB,PRKACG,PRKCA,PRKCB,PRKCG,MAPK1,MAPK3,MAP2K1,MAP2K2,ITPR1,ITPR3,KRAS,RAF1,RAP1A,RAP1B,EP300
Pathway	149807	Bacterial invasion of epithelial cells	KEGG	1.056e-34	2.683e-32	6.387e-34	3.907e-33	48	76	ACTB,SHC3,MET,FN1,PIK3R3,SHC1,SHC4,RHOA,RHOG,ELMO2,GAB1,SRC,WASF1,WASL,CAV1,CAV2,CAV3,CBL,CBLB,CDC42,CDH1,HCLS1,CBLC,SHC2,PIK3CA,PIK3CB,PIK3CD,PIK3R2,VCL,WAS,BCAR1,CRK,CRKL,CTNNA1,CTNNA2,CTNNB1,ILK,ITGB1,PTK2,ELMO1,PXN,DNM1,RAC1,DNM2,DOCK1,ARHGAP10,ARPC5,CTTN
Pathway	147809	Chagas disease (American trypanosomiasis)	KEGG	1.799e-34	4.57e-32	1.063e-33	6.501e-33	55	102	ADCY1,MAPK12,AKT1,AKT2,MAP2K4,FOS,PIK3R3,FAS,FASLG,MYD88,NFKB1,NFKBIA,PLCB1,GNA11,GNA15,GNAI1,GNAI3,GNAO1,GNAQ,NOS2,CASP8,TGFB1,TLR2,TLR4,TNFRSF1A,TRAF6,CHUK,PIK3CA,PIK3CB,PIK3CD,PIK3R2,PLCB2,PLCB3,PPP2CA,PPP2CB,PPP2R1A,PPP2R1B,PPP2R2A,PPP2R2B,PPP2R2C,MAPK14,GNA14,MAPK1,MAPK3,MAPK8,IKBKB,MAPK11,MAPK9,MAPK10,MAPK13,JUN,AKT3,RELA,SMAD2,SMAD3
Pathway	83083	Leukocyte transendothelial migration	KEGG	1.902e-34	4.831e-32	1.098e-33	6.715e-33	58	114	NCF1,ACTB,ACTN4,ACTN1,PTK2B,MAPK12,MYL9,VAV3,PIK3R3,MSN,RHOA,ARHGAP5,OCLN,NCF2,NCF4,GNAI1,GNAI3,ARHGAP35,CDC42,CDH5,TXK,PIK3CA,PIK3CB,PIK3CD,PIK3R2,PLCG1,PLCG2,VASP,VAV1,VAV2,VCAM1,VCL,EZR,BCAR1,MAPK14,PRKCA,PRKCB,PRKCG,CTNNA1,CTNNA2,CTNNB1,CTNND1,MAPK11,MAPK13,MYL12B,CYBA,CYBB,ITGA4,ITGB1,ITGB2,PTK2,ITK,PTPN11,PXN,RAC1,RAC2,RAP1A,RAP1B
Pathway	952858	Platelet activation	KEGG	2.942e-34	7.472e-32	1.66e-33	1.016e-32	60	123	ACTB,ADCY1,ADCY5,ADCY8,MAPK12,AKT1,AKT2,PIK3R3,RHOA,GNA13,FYN,PPP1R12A,SRC,BTK,SYK,PLCB1,GNAI1,GNAI3,GNAQ,NOS3,TBXA2R,ARHGEF12,ARHGAP35,ARHGEF1,TLN1,PIK3R5,PIK3CA,PIK3CB,PIK3CD,PIK3CG,PIK3R2,PLA2G4A,PLCB2,PLCB3,PLCG2,VASP,PPP1CC,MAPK14,PRKACA,PRKACB,PRKACG,PRKCI,PRKCZ,PRKG1,MAPK1,MAPK3,MAPK11,MAPK13,MYL12B,ITGA2B,ITGB1,ITPR1,ITPR3,AKT3,RAP1A,RAP1B,LCP2,RASGRP1,LYN,RASGRP2
Pathway	83059	mTOR signaling pathway	KEGG	6.716e-34	1.706e-31	3.708e-33	2.268e-32	66	151	RPS6,RPS6KA1,RPS6KA2,RPS6KA3,RPS6KB1,RPS6KB2,CLIP1,FZD1,FZD7,RPTOR,AKT1,AKT2,SGK1,PIK3R3,SKP2,AKT1S1,RHOA,MTOR,LAMTOR3,FZD2,SOS1,SOS2,LPIN1,STK11,BRAF,RPS6KA6,MLST8,NRAS,GRB2,GRB10,GSK3B,TNFRSF1A,PDPK1,TSC1,TSC2,CHUK,PIK3CA,PIK3CB,PIK3CD,PIK3R2,HRAS,MAPKAP1,WNT1,WNT5A,WNT11,RICTOR,IGF1R,PRKCA,PRKCB,PRKCG,MAPK1,MAPK3,IKBKB,MAP2K1,MAP2K2,INSR,IRS1,PTEN,KRAS,RAF1,AKT3,DVL1,DVL2,DVL3,RHEB,EIF4EBP1
Pathway	83106	Colorectal cancer	KEGG	2.463e-33	6.256e-31	1.331e-32	8.142e-32	42	60	AKT1,AKT2,FOS,PIK3R3,BIRC5,ARAF,RHOA,MYC,BAD,CCND1,BCL2,BRAF,CASP3,CASP9,GSK3B,TGFB1,CYCS,TP53,PIK3CA,PIK3CB,PIK3CD,PIK3R2,APPL1,MAPK1,MAPK3,CTNNB1,MAPK8,MAPK9,MAPK10,MAP2K1,DCC,JUN,RAC1,RAC2,RAC3,KRAS,RAF1,RALGDS,AKT3,SMAD2,SMAD3,SMAD4
Pathway	83117	Acute myeloid leukemia	KEGG	7.133e-33	1.812e-30	3.775e-32	2.309e-31	40	55	RPS6KB1,RPS6KB2,AKT1,AKT2,FLT3,PIK3R3,ARAF,MTOR,SOS1,SOS2,MYC,BAD,CCND1,STAT3,STAT5A,STAT5B,BRAF,NFKB1,NRAS,GRB2,CHUK,PIK3CA,PIK3CB,PIM1,PIK3CD,PIK3R2,HRAS,MAPK1,MAPK3,IKBKB,MAP2K1,MAP2K2,JUP,KIT,KRAS,RAF1,AKT3,RARA,RELA,EIF4EBP1
Pathway	83109	Endometrial cancer	KEGG	1.633e-32	4.147e-30	8.406e-32	5.142e-31	38	50	ERBB2,AKT1,AKT2,FOXO3,PIK3R3,ARAF,SOS1,SOS2,MYC,BAD,CCND1,BRAF,NRAS,GRB2,CASP9,GSK3B,CDH1,TP53,PDPK1,PIK3CA,PIK3CB,PIK3CD,PIK3R2,HRAS,CTNNA1,CTNNA2,MAPK1,MAPK3,CTNNB1,MAP2K1,MAP2K2,ILK,PTEN,KRAS,RAF1,AKT3,EGFR,ELK1
Pathway	169642	Toxoplasmosis	KEGG	1.655e-32	4.203e-30	8.406e-32	5.142e-31	56	113	MAPK12,AKT1,AKT2,TAB1,ALOX5,BIRC2,BIRC3,XIAP,MYD88,BAD,BCL2,BCL2L1,STAT1,STAT3,NFKB1,NFKBIA,GNAI1,GNAI3,GNAO1,MAP3K7,NOS2,CASP3,CASP8,CASP9,TGFB1,TLR2,TLR4,CYCS,TNFRSF1A,PIK3R5,TRAF6,PDPK1,CHUK,TYK2,PIK3CG,HSPA6,HSPA8,MAPK14,MAPK1,MAPK3,MAPK8,IKBKB,MAPK11,MAPK9,MAPK10,MAPK13,MAP2K3,MAP2K6,ITGA6,BIRC7,ITGB1,JAK1,JAK2,AKT3,BIRC8,RELA
Pathway	695200	HIF-1 signaling pathway	KEGG	1.857e-32	4.718e-30	9.25e-32	5.658e-31	53	101	ERBB2,RPS6,RPS6KB1,RPS6KB2,AKT1,AKT2,FLT1,ANGPT1,ANGPT2,PIK3R3,MKNK1,MTOR,GAPDH,BCL2,STAT3,NFKB1,NOS2,NOS3,CAMK2A,CAMK2B,CAMK2D,CAMK2G,MKNK2,TEK,TLR4,CDKN1A,CDKN1B,HIF1A,HMOX1,PIK3CA,PIK3CB,PIK3CD,PIK3R2,PLCG1,PLCG2,VEGFA,CREBBP,IGF1R,PRKCA,PRKCB,PRKCG,MAPK1,MAPK3,MAP2K1,MAP2K2,CYBB,INSR,AKT3,RELA,EGFR,EIF4EBP1,ENO1,EP300
Pathway	1435207	Breast cancer	KEGG	1.924e-31	4.888e-29	9.399e-31	5.749e-30	62	144	NCOA3,ERBB2,ESR1,ESR2,RPS6KB1,RPS6KB2,SHC3,FZD1,FZD7,AKT1,AKT2,FGFR1,FLT4,FOS,PIK3R3,SHC1,SHC4,ARAF,TNFSF11,MTOR,FZD2,SOS1,SOS2,MYC,SP1,CCND1,BRCA1,BRAF,NOTCH1,NRAS,GRB2,GSK3B,TP53,CDKN1A,PGR,SHC2,PIK3CA,PIK3CB,PIK3CD,PIK3R2,HRAS,WNT1,WNT5A,WNT11,IGF1R,MAPK1,MAPK3,CTNNB1,MAP2K1,MAP2K2,PTEN,JUN,KIT,KRAS,RAF1,AKT3,RB1,DVL1,DVL2,DVL3,E2F1,EGFR
Pathway	585562	Epstein-Barr virus infection	KEGG	1.03e-30	2.616e-28	4.936e-30	3.019e-29	73	203	MAPK12,AKT1,AKT2,TAB1,FGR,MAP2K4,PIK3R3,SKP2,MYC,RIPK1,BCL2,STAT3,NFKB1,NFKBIA,SYK,YWHAQ,MAP3K7,GSK3B,CD19,CD44,CDK1,TP53,CDK2,CDKN1A,CDKN1B,TRAF1,TRAF3,TRAF6,CHUK,TYK2,PIK3CA,PIK3CB,PIK3CD,PIK3R2,PLCG1,PLCG2,HSPA6,HSPA8,HSPB1,VIM,YWHAB,ATF2,YWHAE,CREBBP,YWHAG,YWHAH,YWHAZ,NCOR2,MAPK14,PRKACA,PRKACB,PRKACG,MAPK8,IKBKB,MAPK11,MAPK9,MAPK10,MAPK13,MAP2K3,MAP2K6,MAP2K7,PSMC2,PSMC3,JAK1,PSMD6,JAK3,JUN,…
Pathway	1017634	cAMP signaling pathway	KEGG	1.156e-30	2.935e-28	5.435e-30	3.324e-29	72	198	RRAS,ADCY1,ADCY5,ADCY8,ADRB2,MYL9,AKT1,AKT2,VAV3,RRAS2,FOS,PIK3R3,RHOA,SLC9A1,ATP1A1,PPP1R12A,BAD,BDNF,BRAF,NFATC1,GLI1,NFKB1,NFKBIA,GNAI1,GNAI3,CALM1,CALM2,CAMK2A,CAMK2B,CAMK2D,CAMK2G,GRIN1,GRIN2A,GRIN2D,ARAP3,TIAM1,PAK1,PDE3A,PDE3B,PIK3CA,PIK3CB,PIK3CD,PIK3R2,PLD1,PLD2,VAV1,VAV2,PPARA,CREB1,CREBBP,CREB5,PPP1CC,PRKACA,PRKACB,PRKACG,MAPK1,MAPK3,MAPK8,MAPK9,MAPK10,MAP2K1,MAP2K2,JUN,RAC1,RAC2,RAC3,…
Pathway	812256	TNF signaling pathway	KEGG	1.507e-30	3.827e-28	6.959e-30	4.256e-29	53	108	MAP3K5,MAPK12,AKT1,AKT2,TAB1,MAP2K4,FOS,PIK3R3,BIRC2,BIRC3,FAS,RIPK1,NFKB1,NFKBIA,MAP3K7,RPS6KA4,SOCS3,CASP3,CASP7,CASP8,TNFRSF1A,TRAF1,TRAF3,CEBPB,CHUK,PIK3CA,PIK3CB,PIK3CD,PIK3R2,VCAM1,MAP3K8,CREB1,ATF2,CREB5,MAPK14,MAPK1,MAPK3,MAPK8,IKBKB,MAPK11,MAPK9,MAPK10,MAPK13,MAP2K1,MAP2K3,MAP2K6,MAP2K7,DAB2IP,PTGS2,JUN,JUNB,AKT3,RELA
Pathway	469199	Dopaminergic synapse	KEGG	1.689e-30	4.29e-28	7.661e-30	4.686e-29	58	130	ADCY5,MAPK12,AKT1,AKT2,FOS,ARRB2,PLCB1,GNAI1,GNAI3,GNAO1,GNAQ,GNB2,CACNA1A,CALM1,CALM2,CAMK2A,CAMK2B,CAMK2D,CAMK2G,GRIN2A,GSK3A,GSK3B,PLCB2,PLCB3,CREB1,ATF2,CREB5,PPP1CC,PPP2CA,PPP2CB,PPP2R1A,PPP2R1B,PPP2R2A,PPP2R2B,PPP2R2C,PPP2R3A,PPP2R5A,PPP2R5C,MAPK14,PPP2R5D,PPP3CA,PPP3CB,PPP3CC,PRKACA,PRKACB,PRKACG,PRKCA,PRKCB,PRKCG,MAPK8,MAPK11,MAPK9,MAPK10,MAPK13,ITPR1,ITPR3,AKT3,GNB4
Pathway	173973	Hepatitis C	KEGG	2.812e-30	7.142e-28	1.253e-29	7.664e-29	58	131	MAPK12,AKT1,AKT2,PIK3R3,PIAS1,ARAF,OCLN,SOS1,SOS2,RIPK1,BAD,STAT1,STAT3,BRAF,NFKB1,NFKBIA,NRAS,SOCS3,GRB2,GSK3B,TLR3,TNFRSF1A,TP53,CDKN1A,TRAF3,TRAF6,PDPK1,CHUK,TYK2,PIK3CA,PIK3CB,PIK3CD,PIK3R2,HRAS,PPARA,IFIT1,PPP2CA,PPP2CB,PPP2R1A,PPP2R1B,PPP2R2A,PPP2R2B,PPP2R2C,MAPK14,MAPK1,MAPK3,MAPK8,IKBKB,MAPK11,MAPK9,MAPK10,MAPK13,JAK1,KRAS,RAF1,AKT3,RELA,EGFR
Pathway	1492886	Apelin signaling pathway	KEGG	9.122e-30	2.317e-27	3.995e-29	2.444e-28	59	138	RPS6,RPS6KB1,RPS6KB2,RRAS,ADCY1,MEF2A,ADCY5,MEF2C,MEF2D,ADCY8,AGTR1,AKT1,AKT2,RRAS2,MRAS,SLC9A1,MTOR,GNA13,CCND1,PPARGC1A,SPHK1,PLCB1,GNAI1,GNAI3,GNAQ,GNB2,NOS1,NOS2,NOS3,NRAS,CALM1,CALM2,CDH1,PIK3R5,PDE3B,PIK3C3,PIK3CG,HRAS,PLCB2,PLCB3,PRKACA,PRKACB,PRKACG,PRKCE,MAPK1,MAPK3,MAP2K1,MAP2K2,SPHK2,ITPR1,ITPR3,KRAS,RAF1,AKT3,EGR1,GNB4,SMAD2,SMAD3,SMAD4
Pathway	83118	Small cell lung cancer	KEGG	2.081e-29	5.285e-27	8.958e-29	5.479e-28	46	84	MAX,RXRG,AKT1,AKT2,FHIT,FN1,PIK3R3,APAF1,BIRC2,BIRC3,XIAP,SKP2,MYC,CCND1,BCL2,BCL2L1,NFKB1,NFKBIA,NOS2,CASP9,CYCS,TP53,CDK2,CDKN1B,TRAF1,TRAF3,TRAF6,CHUK,PIK3CA,PIK3CB,PIK3CD,PIK3R2,IKBKB,ITGA6,BIRC7,ITGA2B,PTEN,ITGAV,ITGB1,PTGS2,PTK2,AKT3,BIRC8,RB1,E2F1,RELA
Pathway	1272486	Insulin resistance	KEGG	1.163e-28	2.954e-26	4.924e-28	3.012e-27	51	107	RPS6KA1,RPS6KA2,RPS6KA3,RPS6KB1,RPS6KB2,AKT1,AKT2,FOXO1,PIK3R3,SLC2A4,TRIB3,MTOR,IRS2,SREBF1,STAT3,PPARGC1A,NFKB1,NFKBIA,RPS6KA6,NOS3,SOCS3,GSK3B,CD36,TNFRSF1A,PDPK1,PIK3CA,PIK3CB,PIK3CD,PIK3R2,PPARA,CREB1,CREB5,PPP1CC,PTPA,PRKCB,PRKCD,PRKCE,PRKCQ,PRKCZ,MAPK8,IKBKB,MAPK9,MAPK10,INSR,IRS1,PTEN,PTPN1,PTPN11,TBC1D4,AKT3,RELA
Pathway	83070	Adherens junction	KEGG	1.766e-28	4.485e-26	7.352e-28	4.497e-27	42	72	ERBB2,ACTB,ACTN4,ACTN1,MET,FGFR1,BAIAP2,SORBS1,RHOA,FYN,SRC,IQGAP1,MAP3K7,WASF1,WASL,PARD3,CDC42,CDH1,VCL,WAS,YES1,CREBBP,IGF1R,CTNNA1,CTNNA2,MAPK1,MAPK3,CTNNB1,CTNND1,INSR,FARP2,PTPN1,PTPN6,PTPRJ,RAC1,RAC2,RAC3,EGFR,EP300,SMAD2,SMAD3,SMAD4
Pathway	83058	Autophagy - animal	KEGG	5.908e-28	1.501e-25	2.42e-27	1.48e-26	55	128	RPS6KB1,RPS6KB2,RRAS,RPTOR,AKT1,AKT2,RRAS2,IRS4,MRAS,PIK3R3,AKT1S1,MTOR,IRS2,BAD,BCL2,BCL2L1,STK11,MLST8,MAP3K7,NRAS,HIF1A,TRAF6,PDPK1,HMGB1,TSC1,TSC2,PIK3C3,PIK3CA,PIK3CB,PIK3CD,PIK3R2,HRAS,PPP2CA,PPP2CB,IGF1R,PRKACA,PRKACB,PRKACG,PRKCD,PRKCQ,MAPK1,MAPK3,MAPK8,MAPK9,MAPK10,MAP2K1,MAP2K2,DAPK1,IRS1,PTEN,ITPR1,KRAS,RAF1,AKT3,RHEB
Pathway	952859	Oxytocin signaling pathway	KEGG	8.771e-28	2.228e-25	3.536e-27	2.163e-26	60	153	ACTB,ADCY1,ADCY5,MEF2C,ADCY8,MYL9,FOS,RHOA,MYL6,PPP1R12A,SRC,CCND1,NFATC1,NFATC2,NFATC4,PLCB1,GNAI1,GNAI3,GNAO1,GNAQ,NOS3,NRAS,CALM1,CALM2,CAMK2A,CAMK2B,CAMK2D,CAMK2G,PIK3R5,CDKN1A,PIK3CG,HRAS,PLA2G4A,EEF2K,PLCB2,PLCB3,PPP1CC,PPP3CA,PPP3CB,PPP3CC,PPP3R1,PRKACA,PRKACB,PRKACG,PRKCA,PRKCB,PRKCG,MAPK1,MAPK3,MAP2K1,MAP2K2,PTGS2,ITPR1,ITPR3,JUN,KRAS,RAF1,RCAN1,EGFR,ELK1
Pathway	1469482	Th17 cell differentiation	KEGG	1.302e-27	3.308e-25	5.169e-27	3.161e-26	50	107	RXRG,MAPK12,AHR,FOS,LAT,MTOR,STAT1,STAT3,STAT5A,STAT5B,STAT6,NFATC1,NFATC2,NFKB1,NFKBIA,TGFB1,HIF1A,CHUK,TYK2,PLCG1,HSP90AA1,HSP90AB1,ZAP70,MAPK14,PPP3CA,PPP3CB,PPP3CC,PPP3R1,PRKCQ,MAPK1,MAPK3,MAPK8,IKBKB,MAPK11,MAPK9,MAPK10,MAPK13,IL4,IRF4,JAK1,JAK2,JAK3,JUN,FOXP3,RARA,RELA,LCK,SMAD2,SMAD3,SMAD4
Pathway	948277	Inflammatory mediator regulation of TRP channels	KEGG	6.637e-27	1.686e-24	2.594e-26	1.586e-25	47	97	ADCY1,ADCY5,ADCY8,MAPK12,PIK3R3,SRC,PLCB1,GNAQ,CALM1,CALM2,CAMK2A,CAMK2B,CAMK2D,NTRK1,CAMK2G,PIK3CA,PIK3CB,PIK3CD,PIK3R2,PLA2G4A,PLCB2,PLCB3,PLCG1,PLCG2,PPP1CC,MAPK14,PRKACA,PRKACB,PRKACG,PRKCA,PRKCB,PRKCD,PRKCE,PRKCG,PRKCH,PRKCQ,MAPK8,MAPK11,MAPK9,MAPK10,MAPK13,MAP2K3,MAP2K6,PTGER4,ITPR1,ITPR3,TRPV4
Pathway	989139	AMPK signaling pathway	KEGG	1.705e-26	4.33e-24	6.56e-26	4.013e-25	52	121	RPS6KB1,RPS6KB2,RAB8A,RPTOR,AKT1,AKT2,FOXO1,FOXO3,IRS4,PIK3R3,RAB14,AKT1S1,SLC2A4,MTOR,IRS2,SREBF1,CCND1,STK11,RAB10,PPARGC1A,MAP3K7,SIRT1,CD36,PDPK1,TSC1,TSC2,PFKFB2,PIK3CA,PIK3CB,PIK3CD,PIK3R2,EEF2K,CREB1,CREB5,PPP2CA,PPP2CB,PPP2R1A,PPP2R1B,PPP2R2A,PPP2R2B,PPP2R2C,PPP2R3A,PPP2R5A,PPP2R5C,IGF1R,PPP2R5D,INSR,IRS1,AKT3,RHEB,EIF4EBP1,ELAVL1
Pathway	119304	Progesterone-mediated oocyte maturation	KEGG	4.325e-26	1.099e-23	1.64e-25	1.003e-24	46	96	RPS6KA1,RPS6KA2,RPS6KA3,ADCY1,ADCY5,ADCY8,MAPK12,AKT1,AKT2,PIK3R3,ARAF,BRAF,RPS6KA6,GNAI1,GNAI3,CCNB1,CDK1,CDC25A,CDC25B,CDC25C,CDK2,PDE3B,PGR,PIK3CA,PIK3CB,PIK3CD,PIK3R2,PLK1,HSP90AA1,HSP90AB1,MAPK14,IGF1R,PRKACA,PRKACB,PRKACG,MAPK1,MAPK3,MAPK8,MAPK11,MAPK9,MAPK10,MAPK13,MAP2K1,KRAS,RAF1,AKT3
Pathway	983748	cGMP-PKG signaling pathway	KEGG	4.83e-26	1.227e-23	1.804e-25	1.103e-24	60	163	ADCY1,MEF2A,ADCY5,MEF2C,MEF2D,ADCY8,ADRB2,ADRB3,MYL9,AGTR1,AKT1,AKT2,IRS4,RHOA,GNA13,IRS2,ATP1A1,PPP1R12A,BAD,SRF,NFATC1,NFATC2,NFATC4,PLCB1,GNA11,GNAI1,GNAI3,GNAQ,NOS3,CALM1,CALM2,PIK3R5,PDE3A,PDE3B,TRPC6,PIK3CG,PLCB2,PLCB3,VASP,CREB1,ATF2,CREB5,PPP1CC,PPP3CA,PPP3CB,PPP3CC,PPP3R1,PRKCE,PRKG1,MAPK1,MAPK3,MAP2K1,MAP2K2,INSR,IRS1,ITPR1,ITPR3,RAF1,AKT3,EDNRB
Pathway	83079	Natural killer cell mediated cytotoxicity	KEGG	5.394e-26	1.37e-23	1.986e-25	1.215e-24	54	133	SHC3,PTK2B,VAV3,SH3BP2,PIK3R3,SHC1,SHC4,FAS,FASLG,ARAF,LAT,FYN,SOS1,SOS2,BRAF,NFATC1,NFATC2,SYK,NRAS,CASP3,GRB2,PAK1,SHC2,PIK3CA,PIK3CB,PIK3CD,PIK3R2,HRAS,PLCG1,PLCG2,VAV1,VAV2,ZAP70,PPP3CA,PPP3CB,PPP3CC,PPP3R1,PRKCA,PRKCB,PRKCG,MAPK1,MAPK3,MAP2K1,MAP2K2,ITGB2,PTPN6,PTPN11,RAC1,RAC2,RAC3,KRAS,RAF1,LCK,LCP2
Pathway	83092	Melanogenesis	KEGG	6.335e-26	1.609e-23	2.299e-25	1.406e-24	47	101	ADCY1,ADCY5,ADCY8,FZD1,FZD7,MITF,FZD2,PLCB1,GNAI1,GNAI3,GNAO1,GNAQ,NRAS,CALM1,CALM2,CAMK2A,CAMK2B,CAMK2D,CAMK2G,GSK3B,HRAS,PLCB2,PLCB3,WNT1,WNT5A,WNT11,CREB1,CREBBP,PRKACA,PRKACB,PRKACG,PRKCA,PRKCB,PRKCG,MAPK1,MAPK3,CTNNB1,MAP2K1,MAP2K2,KIT,KRAS,RAF1,DVL1,DVL2,DVL3,EDNRB,EP300
Pathway	83071	Tight junction	KEGG	9.221e-26	2.342e-23	3.299e-25	2.018e-24	61	170	ERBB2,ACTB,ACTN4,ACTN1,MAP3K1,MAP3K5,RAB8A,MYL9,MSN,RHOA,OCLN,MYH2,MYH4,MYH11,MYL6,SRC,PARD6G,CCND1,PARD6B,STK11,NF2,WASL,NEDD4L,TIAM1,ARHGEF2,PARD3,CDC42,HCLS1,HSPA4,VASP,EZR,WAS,PPP2CA,PPP2CB,PPP2R1A,PPP2R1B,PPP2R2A,PPP2R2B,PPP2R2C,PRKACA,PRKACB,PRKACG,PRKCE,PRKCI,PRKCZ,RAPGEF2,MAPK8,MAPK9,MAPK10,MYL12B,MAP2K7,ITGB1,JUN,PARD6A,RAB13,RAC1,RAP1A,ARHGAP17,ACTR3,MYH14,CTTN
Pathway	1319989	Longevity regulating pathway	KEGG	9.976e-26	2.534e-23	3.519e-25	2.153e-24	44	89	RPS6KB1,RPS6KB2,ADCY1,ADCY5,ADCY8,RPTOR,AKT1,AKT2,FOXO1,FOXO3,IRS4,PIK3R3,AKT1S1,MTOR,IRS2,SOD2,STK11,PPARGC1A,NFKB1,NRAS,SIRT1,TP53,TSC1,TSC2,PIK3CA,PIK3CB,PIK3CD,PIK3R2,HRAS,CREB1,ATF2,CREB5,IGF1R,PRKACA,PRKACB,PRKACG,APPL1,INSR,IRS1,KRAS,AKT3,RELA,RHEB,EIF4EBP1
Pathway	126909	Oocyte meiosis	KEGG	6.304e-25	1.601e-22	2.194e-24	1.342e-23	51	124	RPS6KA1,RPS6KA2,RPS6KA3,ADCY1,ADCY5,ADCY8,MAPK12,AR,RPS6KA6,YWHAQ,BTRC,FBXW11,CALM1,CALM2,CAMK2A,CAMK2B,CAMK2D,CAMK2G,CCNB1,CDK1,CDC25C,CDK2,PGR,PLK1,YWHAB,YWHAE,YWHAG,YWHAH,YWHAZ,PPP1CC,PPP2CA,PPP2CB,PPP2R1A,PPP2R1B,PPP2R5A,PPP2R5C,IGF1R,PPP2R5D,PPP3CA,PPP3CB,PPP3CC,PPP3R1,PRKACA,PRKACB,PRKACG,MAPK1,MAPK3,MAP2K1,ITPR1,ITPR3,PLCZ1
Pathway	83104	Shigellosis	KEGG	1.051e-24	2.668e-22	3.606e-24	2.206e-23	37	65	ABL1,ACTB,NOD1,MAPK12,RHOG,ELMO2,SRC,NFKB1,NFKBIA,WASF1,BTRC,FBXW11,WASL,CD44,CDC42,HCLS1,CHUK,VCL,WAS,CRK,CRKL,MAPK14,MAPK1,MAPK3,MAPK8,IKBKB,MAPK11,MAPK9,MAPK10,MAPK13,ITGB1,ELMO1,RAC1,DOCK1,RELA,ARPC5,CTTN
Pathway	102279	Endocytosis	KEGG	1.507e-24	3.827e-22	5.102e-24	3.121e-23	75	260	ERBB3,ERBB4,RAB8A,MET,ADRB2,ADRB3,GRK2,PIP5K1A,PIP5K1B,FGFR2,EEA1,ARAP1,ARAP2,FLT1,GIT1,ARF1,EPN2,ARF6,RHOA,ARRB1,ARRB2,ARFGAP1,SRC,RAB11A,PARD6G,PARD6B,RAB10,ASAP2,WASL,NEDD4L,NTRK1,CAV1,CAV2,CAV3,CBL,PIP5K1C,CBLB,TGFB1,USP8,ARAP3,PARD3,CDC42,TRAF6,PDGFRA,CBLC,AP2M1,AP2S1,PIP5KL1,HRAS,PLD1,PLD2,EPN1,HSPA6,HSPA8,WAS,WIPF1,SH3KBP1,IGF1R,CSF1R,PRKCI,PRKCZ,GIT2,ASAP1,PARD6A,ARFGAP3,KDR,DNM1,KIT,WIPF…
Pathway	217716	Cholinergic synapse	KEGG	1.756e-24	4.461e-22	5.869e-24	3.59e-23	48	112	ADCY1,ADCY5,ADCY8,AKT1,AKT2,FOS,PIK3R3,FYN,BCL2,PLCB1,GNA11,GNAI1,GNAI3,GNAO1,GNAQ,GNB2,CACNA1A,NRAS,CAMK2A,CAMK2B,CAMK2D,CAMK2G,PIK3R5,PIK3CA,PIK3CB,PIK3CD,PIK3CG,PIK3R2,HRAS,PLCB2,PLCB3,CREB1,CREB5,PRKACA,PRKACB,PRKACG,PRKCA,PRKCB,PRKCG,MAPK1,MAPK3,MAP2K1,ITPR1,ITPR3,JAK2,KRAS,AKT3,GNB4
Pathway	658418	Viral carcinogenesis	KEGG	1.127e-23	2.862e-21	3.717e-23	2.274e-22	64	201	ACTN4,ACTN1,PIK3R3,SKP2,RHOA,SRC,BAD,SRF,CCND1,STAT3,STAT5A,STAT5B,KAT2B,NFKB1,NFKBIA,SYK,YWHAQ,NRAS,CASP3,GRB2,CASP8,GSN,CDK1,CDC42,TP53,CDK2,CDKN1A,CDKN1B,TRAF1,TRAF3,MAPKAPK2,CHEK1,HNRNPK,PIK3CA,PIK3CB,PIK3CD,PIK3R2,HRAS,YWHAB,CREB1,ATF2,YWHAE,CREBBP,YWHAG,YWHAH,YWHAZ,CREB5,PRKACA,PRKACB,PRKACG,MAPK1,MAPK3,HDAC9,JAK1,JAK3,JUN,PXN,RAC1,KRAS,RASA2,RB1,RELA,LYN,EP300
Pathway	83086	Long-term depression	KEGG	1.028e-22	2.612e-20	3.348e-22	2.048e-21	34	60	ARAF,GNA13,BRAF,PLCB1,GNA11,GNAI1,GNAI3,GNAO1,GNAQ,NOS1,CACNA1A,NRAS,HRAS,PLA2G4A,PLCB2,PLCB3,PPP2CA,PPP2CB,PPP2R1A,PPP2R1B,IGF1R,PRKCA,PRKCB,PRKCG,PRKG1,MAPK1,MAPK3,MAP2K1,MAP2K2,ITPR1,ITPR3,KRAS,RAF1,LYN
Pathway	749777	Hippo signaling pathway	KEGG	2.207e-22	5.606e-20	7.096e-22	4.34e-21	54	154	ACTB,FZD1,FZD7,YAP1,BIRC2,BIRC5,FZD2,MYC,PARD6G,CCND1,STK3,PARD6B,BMP4,NF2,GLI2,YWHAQ,BTRC,FBXW11,GSK3B,TGFB1,RASSF1,PARD3,CDH1,WNT1,WNT5A,WNT11,YWHAB,YWHAE,YWHAG,YWHAH,YWHAZ,PPP1CC,PPP2CA,PPP2CB,PPP2R1A,PPP2R1B,PPP2R2A,PPP2R2B,PPP2R2C,PRKCI,PRKCZ,CTNNA1,CTNNA2,CTNNB1,ITGB2,PARD6A,DVL1,DVL2,DVL3,SMAD1,SMAD2,SMAD3,SMAD4,SMAD7
Pathway	83114	Melanoma	KEGG	2.586e-22	6.567e-20	8.209e-22	5.021e-21	36	69	MET,MITF,AKT1,AKT2,FGFR1,PIK3R3,ARAF,BAD,CCND1,BRAF,NRAS,CDH1,TP53,CDKN1A,HGF,PDGFA,PDGFB,PDGFRA,PDGFRB,PIK3CA,PIK3CB,PIK3CD,PIK3R2,HRAS,IGF1R,MAPK1,MAPK3,MAP2K1,MAP2K2,PTEN,KRAS,RAF1,AKT3,RB1,E2F1,EGFR
Pathway	1340713	Longevity regulating pathway - multiple species	KEGG	4.42e-22	1.123e-19	1.386e-21	8.479e-21	34	62	RPS6KB1,RPS6KB2,ADCY1,ADCY5,ADCY8,RPTOR,AKT1,AKT2,FOXO1,FOXO3,IRS4,PIK3R3,AKT1S1,MTOR,IRS2,SOD1,SOD2,NRAS,SIRT1,PIK3CA,PIK3CB,PIK3CD,PIK3R2,HRAS,HSPA6,HSPA8,IGF1R,PRKACA,PRKACB,PRKACG,INSR,IRS1,KRAS,AKT3
Pathway	83076	Toll-like receptor signaling pathway	KEGG	2.58e-21	6.554e-19	7.992e-21	4.888e-20	43	104	MAPK12,AKT1,AKT2,TAB1,MAP2K4,FOS,PIK3R3,MYD88,RIPK1,STAT1,NFKB1,NFKBIA,MAP3K7,CASP8,TLR2,TLR3,TLR4,TRAF3,TRAF6,CHUK,PIK3CA,PIK3CB,PIK3CD,PIK3R2,MAP3K8,MAPK14,MAPK1,MAPK3,MAPK8,IKBKB,MAPK11,MAPK9,MAPK10,MAPK13,MAP2K1,MAP2K2,MAP2K3,MAP2K6,MAP2K7,JUN,RAC1,AKT3,RELA
Pathway	213780	Tuberculosis	KEGG	3.305e-21	8.395e-19	1.011e-20	6.186e-20	57	179	MAPK12,AKT1,AKT2,EEA1,APAF1,RHOA,MYD88,SRC,BAD,BCL2,STAT1,SPHK1,NFKB1,SYK,NOS2,CALM1,CALM2,CAMK2A,CAMK2B,CAMK2D,CAMK2G,CASP3,ARHGEF12,CASP8,CASP9,TGFB1,TLR2,TLR4,CYCS,TNFRSF1A,TRAF6,CEBPB,PIK3C3,HSPA9,VDR,CREB1,CREBBP,MAPK14,PPP3CA,PPP3CB,PPP3CC,PPP3R1,MAPK1,MAPK3,MAPK8,MAPK11,MAPK9,MAPK10,MAPK13,SPHK2,ITGB2,JAK1,JAK2,RAF1,AKT3,RELA,EP300
Pathway	852705	MicroRNAs in cancer	KEGG	3.718e-21	9.444e-19	1.124e-20	6.876e-20	76	299	SPRY2,ERBB2,ERBB3,ABL1,PAK4,MCL1,EZH2,MDM4,MET,RPTOR,SHC1,SHC4,RHOA,MTOR,IRS2,SOS1,SOS2,MYC,CCND1,BCL2,BCL2L2,STAT3,BMI1,BRCA1,NFKB1,NOTCH1,NRAS,CASP3,GRB2,SIRT1,THBS1,RASSF1,CD44,CDC25A,CDC25B,CDC25C,TP53,CDKN1A,CDKN1B,PDGFA,PDGFB,PDGFRA,PDGFRB,HMOX1,HNRNPK,PIK3CA,PIM1,PIK3R2,HRAS,PLCG1,PLCG2,VEGFA,EZR,VIM,CREBBP,CRK,CRKL,PRKCA,PRKCB,PRKCE,PRKCG,MAPK1,IKBKB,MAP2K1,MAP2K2,IRS1,PTEN,PTGS2,DNMT1,KR…
Pathway	83072	Gap junction	KEGG	9.136e-21	2.32e-18	2.73e-20	1.67e-19	39	88	ADCY1,ADCY5,ADCY8,MAP3K2,SOS1,SOS2,SRC,GJA1,PLCB1,GNA11,GNAI1,GNAI3,GNAQ,NRAS,GRB2,CDK1,PDGFA,PDGFB,PDGFRA,PDGFRB,HRAS,PLCB2,PLCB3,PRKACA,PRKACB,PRKACG,PRKCA,PRKCB,PRKCG,PRKG1,MAPK1,MAPK3,MAP2K1,MAP2K2,ITPR1,ITPR3,KRAS,RAF1,EGFR
Pathway	83061	Wnt signaling pathway	KEGG	9.471e-21	2.406e-18	2.797e-20	1.711e-19	50	143	FZD1,FZD7,RHOA,FZD2,MYC,CCND1,NFATC1,NFATC2,NFATC4,PLCB1,MAP3K7,BTRC,FBXW11,CAMK2A,CAMK2B,CAMK2D,CAMK2G,GSK3B,TP53,PLCB2,PLCB3,WNT1,WNT5A,WNT11,CREBBP,PPP3CA,PPP3CB,PPP3CC,PPP3R1,PRKACA,PRKACB,PRKACG,PRKCA,PRKCB,PRKCG,CTNNB1,MAPK8,MAPK9,MAPK10,JUN,RAC1,RAC2,RAC3,DVL1,DVL2,DVL3,FOSL1,EP300,SMAD3,SMAD4
Pathway	908257	Adrenergic signaling in cardiomyocytes	KEGG	1.345e-20	3.417e-18	3.928e-20	2.402e-19	50	144	ADCY1,ADCY5,ADCY8,ADRB2,MAPK12,AGTR1,AKT1,AKT2,SLC9A1,ATP1A1,BCL2,PLCB1,GNAI1,GNAI3,GNAQ,CALM1,CALM2,CAMK2A,CAMK2B,CAMK2D,CAMK2G,PIK3R5,PIK3CG,PLCB2,PLCB3,CREB1,ATF2,CREB5,PPP1CC,PPP2CA,PPP2CB,PPP2R1A,PPP2R1B,PPP2R2A,PPP2R2B,PPP2R2C,PPP2R3A,PPP2R5A,PPP2R5C,MAPK14,PPP2R5D,PRKACA,PRKACB,PRKACG,PRKCA,MAPK1,MAPK3,MAPK11,MAPK13,AKT3
Pathway	1059538	Central carbon metabolism in cancer	KEGG	4.483e-20	1.139e-17	1.294e-19	7.915e-19	33	65	ERBB2,MET,AKT1,AKT2,FGFR1,FGFR2,FLT3,PIK3R3,MTOR,MYC,NRAS,NTRK1,NTRK3,TP53,HIF1A,PDGFRA,PDGFRB,PIK3CA,PIK3CB,PIK3CD,PIK3R2,HRAS,MAPK1,MAPK3,MAP2K1,MAP2K2,PTEN,KIT,KRAS,RAF1,AKT3,RET,EGFR
Pathway	1026136	Signaling pathways regulating pluripotency of stem cells	KEGG	1.043e-19	2.65e-17	2.978e-19	1.821e-18	48	139	FZD1,FZD7,MAPK12,AKT1,AKT2,FGFR1,FGFR2,PIK3R3,FZD2,MYC,STAT3,BMI1,BMP4,HNF1A,TCF3,NRAS,GRB2,GSK3B,PIK3CA,PIK3CB,PIK3CD,PIK3R2,HRAS,WNT1,WNT5A,WNT11,MAPK14,IGF1R,MAPK1,MAPK3,CTNNB1,MAPK11,MAPK13,MAP2K1,MAP2K2,JAK1,JAK2,JAK3,KRAS,RAF1,AKT3,DVL1,DVL2,DVL3,SMAD1,SMAD2,SMAD3,SMAD4
Pathway	144181	Leishmaniasis	KEGG	4.078e-19	1.036e-16	1.151e-18	7.04e-18	34	73	NCF1,MAPK12,TAB1,FOS,MYD88,NCF2,NCF4,STAT1,NFKB1,NFKBIA,MAP3K7,NOS2,TGFB1,TLR2,TLR4,TRAF6,MAPK14,PRKCB,MAPK1,MAPK3,MAPK11,MAPK13,IL4,CYBA,ITGA4,ITGB1,ITGB2,PTGS2,JAK1,JAK2,JUN,PTPN6,RELA,ELK1
Pathway	1458885	Th1 and Th2 cell differentiation	KEGG	5.757e-19	1.462e-16	1.607e-18	9.828e-18	38	92	MAPK12,FOS,LAT,STAT1,STAT4,STAT5A,STAT5B,STAT6,NFATC1,NFATC2,NFKB1,NFKBIA,NOTCH1,CHUK,TYK2,PLCG1,ZAP70,MAPK14,PPP3CA,PPP3CB,PPP3CC,PPP3R1,PRKCQ,MAPK1,MAPK3,MAPK8,IKBKB,MAPK11,MAPK9,MAPK10,MAPK13,IL4,JAK1,JAK2,JAK3,JUN,RELA,LCK
Pathway	83052	Phosphatidylinositol signaling system	KEGG	6.201e-19	1.575e-16	1.712e-18	1.047e-17	39	97	PIP5K1A,PIP5K1B,PIK3R3,DGKZ,SYNJ1,SYNJ2,PLCB1,CALM1,CALM2,PLCD4,OCRL,PIP5K1C,PIK3C2A,PIK3C2B,PIK3C2G,PIK3C3,PIK3CA,PIK3CB,PIK3CD,PIK3R2,PIP4K2A,PLCB2,PLCB3,PLCD1,PLCG1,PLCG2,INPP5E,PRKCA,PRKCB,PRKCG,INPP5B,INPP5D,INPPL1,PTEN,ITPR1,ITPR3,PLCZ1,PIKFYVE,PIP4K2C
Pathway	83050	Calcium signaling pathway	KEGG	1.383e-18	3.514e-16	3.779e-18	2.311e-17	54	182	ERBB2,ERBB3,ERBB4,ADCY1,ADCY8,PTK2B,ADRB2,ADRB3,AGTR1,SPHK1,PLCB1,GNA11,GNA15,GNAQ,NOS1,NOS2,NOS3,TBXA2R,CACNA1A,CALM1,CALM2,CAMK2A,CAMK2B,CAMK2D,CAMK2G,PLCD4,GRIN1,GRIN2A,GRIN2D,PDGFRA,PDGFRB,LTB4R2,PLCB2,PLCB3,PLCD1,PLCG1,PLCG2,PPP3CA,PPP3CB,PPP3CC,PPP3R1,GNA14,PRKACA,PRKACB,PRKACG,PRKCA,PRKCB,PRKCG,SPHK2,ITPR1,ITPR3,PLCZ1,EDNRB,EGFR
Pathway	83099	Amyotrophic lateral sclerosis (ALS)	KEGG	1.987e-18	5.046e-16	5.368e-18	3.283e-17	28	51	MAP3K5,MAPK12,APAF1,ALS2,SOD1,BAD,BCL2,BCL2L1,NOS1,CASP3,CASP9,GRIN1,GRIN2A,GRIN2D,CYCS,TNFRSF1A,TP53,MAPK14,PPP3CA,PPP3CB,PPP3CC,PPP3R1,MAPK11,MAPK13,MAP2K3,MAP2K6,DAXX,RAC1
Pathway	96530	Vascular smooth muscle contraction	KEGG	2.51e-18	6.375e-16	6.711e-18	4.105e-17	43	121	PPP1R14A,ADCY1,ADCY5,ADCY8,MYL9,AGTR1,ARAF,RHOA,GNA13,MYH11,MYL6,PPP1R12A,BRAF,PLCB1,GNA11,GNAQ,CALM1,CALM2,ARHGEF12,ARHGEF1,PLA2G4A,PLCB2,PLCB3,PPP1CC,PRKACA,PRKACB,PRKACG,PRKCA,PRKCB,PRKCD,PRKCE,PRKCG,PRKCH,PRKCQ,PRKG1,MAPK1,MAPK3,MAP2K1,MAP2K2,ARHGEF11,ITPR1,ITPR3,RAF1
Pathway	217173	Influenza A	KEGG	3.249e-18	8.251e-16	8.595e-18	5.257e-17	52	173	ACTB,MAPK12,AKT1,AKT2,MAP2K4,PIK3R3,FAS,FASLG,MYD88,STAT1,NFKB1,NFKBIA,SOCS3,CASP9,GSK3B,TLR3,TLR4,CYCS,TNFRSF1A,TYK2,PIK3CA,PIK3CB,PIK3CD,PIK3R2,HSPA6,HSPA8,ATF2,CREBBP,MAPK14,PRKCA,PRKCB,MAPK1,MAPK3,MAPK8,IKBKB,MAPK11,MAPK9,MAPK10,MAPK13,MAP2K1,MAP2K2,MAP2K3,MAP2K6,MAP2K7,BCL2L2-PABPN1,JAK1,JAK2,JUN,RAF1,AKT3,RELA,EP300
Pathway	1384747	Apoptosis - multiple species	KEGG	2.563e-17	6.51e-15	6.711e-17	4.105e-16	22	33	BIRC6,APAF1,BIRC2,BIRC3,XIAP,BIRC5,BCL2,BCL2L1,HTRA2,CASP3,CASP7,CASP8,CASP9,CYCS,TNFRSF1A,DIABLO,MAPK8,MAPK9,MAPK10,BIRC7,BIRC8,BCL2L11
Pathway	83115	Bladder cancer	KEGG	7.348e-17	1.866e-14	1.905e-16	1.165e-15	24	41	ERBB2,ARAF,MYC,SRC,CCND1,BRAF,NRAS,THBS1,RASSF1,CDH1,TP53,CDKN1A,HRAS,VEGFA,MAPK1,MAPK3,MAP2K1,MAP2K2,DAPK1,KRAS,RAF1,RB1,E2F1,EGFR
Pathway	634527	NF-kappa B signaling pathway	KEGG	1.363e-16	3.462e-14	3.496e-16	2.139e-15	36	95	TAB1,BIRC2,BIRC3,XIAP,TNFSF11,LAT,CARD11,MYD88,RIPK1,BCL2,BCL2L1,TNFRSF11A,NFKB1,BTK,NFKBIA,SYK,MAP3K7,TLR4,TNFRSF1A,TRAF1,TRAF3,TRAF6,BLNK,CHUK,PLCG1,PLCG2,VCAM1,ZAP70,PRKCB,PRKCQ,IKBKB,PTGS2,RELA,RELB,LCK,LYN
Pathway	82987	Inositol phosphate metabolism	KEGG	1.516e-16	3.85e-14	3.85e-16	2.355e-15	31	71	PIP5K1A,PIP5K1B,SYNJ1,SYNJ2,PLCB1,PLCD4,OCRL,PIP5K1C,PIK3C2A,PIK3C2B,PIK3C2G,PIK3C3,PIK3CA,PIK3CB,PIK3CD,PIK3CG,PIP4K2A,PIP5KL1,PLCB2,PLCB3,PLCD1,PLCG1,PLCG2,INPP5E,INPP5B,INPP5D,INPPL1,PTEN,PLCZ1,PIKFYVE,PIP4K2C
Pathway	213306	Measles	KEGG	1.122e-15	2.85e-13	2.822e-15	1.726e-14	42	134	RACK1,AKT1,AKT2,PIK3R3,FAS,FASLG,MSN,FYN,MYD88,CCND1,STAT1,STAT3,STAT5A,STAT5B,NFKB1,NFKBIA,MAP3K7,CBLB,GSK3B,CD28,TLR2,TLR4,TP53,CDK2,CDKN1B,TRAF6,CHUK,TYK2,PIK3CA,PIK3CB,PIK3CD,PIK3R2,HSPA6,HSPA8,PRKCQ,IL4,JAK1,JAK2,JAK3,DOK1,AKT3,RELA
Pathway	698773	Circadian entrainment	KEGG	1.473e-15	3.742e-13	3.669e-15	2.244e-14	35	96	ADCY1,ADCY5,ADCY8,FOS,PLCB1,GNAI1,GNAI3,GNAO1,GNAQ,GNB2,NOS1,CALM1,CALM2,CAMK2A,CAMK2B,CAMK2D,CAMK2G,GRIN1,GRIN2A,GRIN2D,PLCB2,PLCB3,CREB1,PRKACA,PRKACB,PRKACG,PRKCA,PRKCB,PRKCG,PRKG1,MAPK1,MAPK3,ITPR1,ITPR3,GNB4
Pathway	1404797	Platinum drug resistance	KEGG	3.527e-15	8.958e-13	8.697e-15	5.32e-14	30	73	ERBB2,MAP3K5,AKT1,AKT2,PIK3R3,APAF1,BIRC2,BIRC3,XIAP,BIRC5,FAS,FASLG,BAD,BCL2,BCL2L1,BRCA1,CASP3,CASP8,CASP9,CYCS,TP53,CDKN1A,PDPK1,PIK3CA,PIK3CB,PIK3CD,PIK3R2,MAPK1,MAPK3,AKT3
Pathway	83077	Jak-STAT signaling pathway	KEGG	1.717e-14	4.361e-12	4.193e-14	2.565e-13	44	156	EPOR,MCL1,AKT1,AKT2,MPL,PIK3R3,PIAS1,MTOR,SOS1,SOS2,MYC,CCND1,BCL2,BCL2L1,STAT1,STAT3,STAT4,STAT5A,STAT5B,STAT6,GH1,GHR,SOCS3,GRB2,CDKN1A,TYK2,PIK3CA,PIK3CB,PIM1,PIK3CD,PIK3R2,HRAS,CREBBP,CSF2RB,IL3,IL4,JAK1,JAK2,JAK3,PTPN6,PTPN11,RAF1,AKT3,EP300
Pathway	122191	NOD-like receptor signaling pathway	KEGG	2.368e-14	6.015e-12	5.728e-14	3.504e-13	46	170	NOD1,MAPK12,TAB1,BIRC2,BIRC3,XIAP,RBCK1,RHOA,MYD88,RIPK1,BCL2,BCL2L1,ERBIN,STAT1,NFKB1,NFKBIA,PLCB1,MAP3K7,CASP8,TLR4,TRAF3,TRAF6,TRIP6,CHUK,TYK2,PLCB2,PLCB3,HSP90AA1,HSP90AB1,MAPK14,PRKCD,MAPK1,MAPK3,MAPK8,IKBKB,MAPK11,MAPK9,MAPK10,MAPK13,CYBA,CYBB,ITPR1,ITPR3,JAK1,JUN,RELA
Pathway	1222950	Regulation of lipolysis in adipocytes	KEGG	2.497e-14	6.342e-12	5.983e-14	3.659e-13	25	54	ADCY1,ADCY5,ADCY8,ADRB2,ADRB3,AKT1,AKT2,IRS4,PIK3R3,IRS2,GNAI1,GNAI3,PDE3B,PIK3CA,PIK3CB,PIK3CD,PIK3R2,PRKACA,PRKACB,PRKACG,PRKG1,INSR,IRS1,PTGS2,AKT3
Pathway	547607	Amphetamine addiction	KEGG	2.78e-14	7.061e-12	6.538e-14	3.999e-13	28	68	ADCY5,FOS,FOSB,CALM1,CALM2,CAMK2A,CAMK2B,CAMK2D,CAMK2G,GRIN1,GRIN2A,GRIN2D,SIRT1,CREB1,ATF2,CREB5,PPP1CC,PPP3CA,PPP3CB,PPP3CC,PPP3R1,PRKACA,PRKACB,PRKACG,PRKCA,PRKCB,PRKCG,JUN
Pathway	83102	Epithelial cell signaling in Helicobacter pylori infection	KEGG	2.78e-14	7.061e-12	6.538e-14	3.999e-13	28	68	MET,NOD1,MAPK12,MAP2K4,GIT1,SRC,NFKB1,NFKBIA,CASP3,PAK1,CDC42,CHUK,PLCG1,PLCG2,MAPK14,CSK,MAPK8,IKBKB,MAPK11,MAPK9,MAPK10,MAPK13,JUN,PTPN11,RAC1,RELA,EGFR,LYN
Pathway	83094	Type II diabetes mellitus	KEGG	3.348e-14	8.503e-12	7.801e-14	4.772e-13	23	46	IRS4,PIK3R3,SLC2A4,MTOR,IRS2,CACNA1A,SOCS3,PIK3CA,PIK3CB,PIK3CD,PIK3R2,PRKCD,PRKCE,PRKCZ,MAPK1,MAPK3,MAPK8,IKBKB,MAPK9,MAPK10,INSR,PDX1,IRS1
Pathway	167324	Amoebiasis	KEGG	6.832e-14	1.735e-11	1.578e-13	9.649e-13	33	96	ACTN4,ACTN1,ADCY1,FN1,PIK3R3,NFKB1,PLCB1,GNA11,GNA15,GNAQ,NOS2,CASP3,TGFB1,TLR2,TLR4,PIK3CA,PIK3CB,PIK3CD,PIK3R2,PLCB2,PLCB3,HSPB1,VCL,GNA14,PRKACA,PRKACB,PRKACG,PRKCA,PRKCB,PRKCG,ITGB2,PTK2,RELA
Pathway	83093	Adipocytokine signaling pathway	KEGG	3.551e-13	9.019e-11	8.126e-13	4.97e-12	27	69	RXRG,AKT1,AKT2,IRS4,SLC2A4,MTOR,IRS2,STAT3,STK11,PPARGC1A,NFKB1,NFKBIA,SOCS3,CD36,TNFRSF1A,CHUK,PPARA,PRKCQ,MAPK8,IKBKB,MAPK9,MAPK10,IRS1,JAK2,PTPN11,AKT3,RELA
Pathway	1222951	Renin secretion	KEGG	5.285e-13	1.342e-10	1.199e-12	7.331e-12	26	65	ADCY5,ADRB2,ADRB3,AGT,AGTR1,PLCB1,GNAI1,GNAI3,GNAQ,CALM1,CALM2,PDE3A,PDE3B,PLCB2,PLCB3,CREB1,PPP3CA,PPP3CB,PPP3CC,PPP3R1,PRKACA,PRKACB,PRKACG,PTGER4,ITPR1,ITPR3
Pathway	1144996	Glucagon signaling pathway	KEGG	6.645e-13	1.688e-10	1.494e-12	9.136e-12	33	103	AKT1,AKT2,FOXO1,PPARGC1A,PLCB1,GNAQ,CALM1,CALM2,CAMK2A,CAMK2B,CAMK2D,CAMK2G,SIRT1,PDE3B,PLCB2,PLCB3,PPARA,CREB1,ATF2,CREBBP,CREB5,PPP3CA,PPP4C,PPP3CB,PPP3CC,PPP3R1,PRKACA,PRKACB,PRKACG,ITPR1,ITPR3,AKT3,EP300
Pathway	1474301	IL-17 signaling pathway	KEGG	1.01e-12	2.566e-10	2.251e-12	1.377e-11	31	93	MAPK12,FOS,FOSB,NFKB1,NFKBIA,MAP3K7,CASP3,CASP8,GSK3B,TRAF3,TRAF6,CEBPB,CHUK,HSP90AA1,HSP90AB1,MAPK14,MAPK1,MAPK3,MAPK8,IKBKB,MAPK11,MAPK9,MAPK10,MAPK13,IL4,PTGS2,JUN,JUND,RELA,FOSL1,ELAVL1
Pathway	213818	Glutamatergic synapse	KEGG	2.96e-12	7.519e-10	6.538e-12	3.999e-11	34	114	ADCY1,ADCY5,ADCY8,GRK2,PLCB1,GNAI1,GNAI3,GNAO1,GNAQ,GNB2,CACNA1A,GRIN1,GRIN2A,GRIN2D,PLA2G4A,PLCB2,PLCB3,PLD1,PLD2,PPP3CA,PPP3CB,PPP3CC,PPP3R1,PRKACA,PRKACB,PRKACG,PRKCA,PRKCB,PRKCG,MAPK1,MAPK3,ITPR1,ITPR3,GNB4
Pathway	130626	Aldosterone-regulated sodium reabsorption	KEGG	3.148e-12	7.996e-10	6.893e-12	4.216e-11	19	37	SCNN1B,SGK1,PIK3R3,ATP1A1,SFN,NEDD4L,PDPK1,PIK3CA,PIK3CB,PIK3CD,PIK3R2,PRKCA,PRKCB,PRKCG,MAPK1,MAPK3,INSR,IRS1,KRAS
Pathway	154409	Gastric acid secretion	KEGG	3.702e-12	9.404e-10	8.037e-12	4.916e-11	27	75	ACTB,ADCY1,ADCY5,ADCY8,SLC9A1,ATP1A1,PLCB1,GNAI1,GNAI3,GNAQ,CALM1,CALM2,CAMK2A,CAMK2B,CAMK2D,CAMK2G,PLCB2,PLCB3,EZR,PRKACA,PRKACB,PRKACG,PRKCA,PRKCB,PRKCG,ITPR1,ITPR3
Pathway	218111	Pertussis	KEGG	5.324e-12	1.352e-09	1.146e-11	7.01e-11	27	76	NOD1,MAPK12,FOS,RHOA,MYD88,NFKB1,GNAI1,GNAI3,NOS2,CALM1,CALM2,CASP3,CASP7,TLR4,TRAF6,MAPK14,MAPK1,MAPK3,MAPK8,MAPK11,MAPK9,MAPK10,MAPK13,ITGB1,ITGB2,JUN,RELA
Pathway	1272485	Aldosterone synthesis and secretion	KEGG	6.533e-12	1.659e-09	1.394e-11	8.529e-11	28	82	ADCY1,ADCY5,ADCY8,AGTR1,PLCB1,GNA11,GNAQ,CALM1,CALM2,CAMK2A,CAMK2B,CAMK2D,CAMK2G,NR4A1,PLCB2,PLCB3,CREB1,ATF2,CREB5,PRKACA,PRKACB,PRKACG,PRKCA,PRKCB,PRKCE,PRKCG,ITPR1,ITPR3
Pathway	525336	Serotonergic synapse	KEGG	1.175e-11	2.984e-09	2.478e-11	1.516e-10	33	113	ADCY5,ALOX5,ARAF,BRAF,PLCB1,GNAI1,GNAI3,GNAO1,GNAQ,GNB2,CACNA1A,NRAS,CASP3,HRAS,PLA2G4A,PLCB2,PLCB3,PRKACA,PRKACB,PRKACG,PRKCA,PRKCB,PRKCG,MAPK1,MAPK3,MAP2K1,PTGS2,ITPR1,ITPR3,KRAS,RAF1,DUSP1,GNB4
Pathway	537443	Retrograde endocannabinoid signaling	KEGG	1.18e-11	2.998e-09	2.478e-11	1.516e-10	31	101	ADCY1,ADCY5,ADCY8,MAPK12,PLCB1,GNAI1,GNAI3,GNAO1,GNAQ,GNB2,CACNA1A,PLCB2,PLCB3,MAPK14,PRKACA,PRKACB,PRKACG,PRKCA,PRKCB,PRKCG,MAPK1,MAPK3,MAPK8,MAPK11,MAPK9,MAPK10,MAPK13,PTGS2,ITPR1,ITPR3,GNB4
Pathway	862188	Non-alcoholic fatty liver disease (NAFLD)	KEGG	3.072e-11	7.803e-09	6.396e-11	3.912e-10	38	149	MAP3K5,MAP3K11,AKT1,AKT2,PIK3R3,FAS,FASLG,MT-CO2,IRS2,SREBF1,NFKB1,SOCS3,CASP3,CASP7,CASP8,GSK3A,GSK3B,TGFB1,CYCS,TNFRSF1A,CDC42,PIK3CA,PIK3CB,PIK3CD,PIK3R2,PPARA,MAPK8,IKBKB,MAPK9,MAPK10,INSR,IRS1,DDIT3,JUN,RAC1,AKT3,BCL2L11,RELA
Pathway	1496831	Mitophagy - animal	KEGG	3.15e-11	8e-09	6.504e-11	3.978e-10	24	65	RRAS,MITF,FOXO3,RRAS2,MRAS,SP1,SRC,BCL2L1,NRAS,USP8,TP53,HIF1A,UBB,HRAS,MAPK8,MAPK9,MAPK10,PINK1,JUN,KRAS,E2F1,RELA,RHOT2,RHOT1
Pathway	83103	Pathogenic Escherichia coli infection	KEGG	3.285e-11	8.345e-09	6.73e-11	4.116e-10	22	55	ABL1,ACTB,NCK2,RHOA,OCLN,FYN,NCK1,YWHAQ,WASL,TLR4,ARHGEF2,CDC42,CDH1,HCLS1,EZR,WAS,YWHAZ,PRKCA,CTNNB1,ITGB1,ARPC5,CTTN
Pathway	83054	Cell cycle	KEGG	3.959e-11	1.006e-08	8.02e-11	4.906e-10	34	124	ABL1,SKP2,MYC,CCND1,YWHAQ,SFN,GSK3B,CCNB1,TGFB1,CDK1,CDC25A,CDC25B,CDC25C,TP53,CDK2,CDKN1A,CDKN1B,CHEK1,PLK1,WEE1,YWHAB,YWHAE,CREBBP,YWHAG,YWHAH,YWHAZ,PRKDC,GADD45A,RB1,E2F1,EP300,SMAD2,SMAD3,SMAD4
Pathway	83112	Thyroid cancer	KEGG	3.979e-11	1.011e-08	8.02e-11	4.906e-10	16	29	RXRG,MYC,CCND1,BRAF,NRAS,NTRK1,CDH1,TP53,HRAS,MAPK1,MAPK3,CTNNB1,MAP2K1,MAP2K2,KRAS,RET
Pathway	375172	Salmonella infection	KEGG	1.41e-10	3.581e-08	2.819e-10	1.725e-09	27	86	ACTB,MAPK12,FLNA,FLNC,FOS,RHOG,MYD88,NFKB1,WASF1,NOS2,WASL,TLR4,CDC42,WAS,MAPK14,MAPK1,MAPK3,MAPK8,MAPK11,MAPK9,MAPK10,MAPK13,JUN,RAC1,RELA,ARPC5,MYH14
Pathway	377873	Herpes simplex infection	KEGG	1.99e-09	5.055e-07	3.949e-09	2.415e-08	40	185	TAB1,FOS,FAS,FASLG,SKP2,MYD88,STAT1,NFKB1,NFKBIA,MAP3K7,SOCS3,CASP3,CASP8,TLR2,TLR3,CYCS,CDK1,TNFRSF1A,TP53,CDK2,TRAF1,TRAF3,TRAF6,HNRNPK,CHUK,TYK2,IFIT1,CREBBP,PPP1CC,MAPK8,IKBKB,MAPK9,MAPK10,DAXX,JAK1,JAK2,JUN,PTPN11,RELA,EP300
Pathway	777534	Insulin secretion	KEGG	3.122e-09	7.931e-07	6.148e-09	3.761e-08	25	85	ADCY1,ADCY5,ADCY8,ATP1A1,VAMP2,PLCB1,GNA11,GNAQ,CAMK2A,CAMK2B,CAMK2D,CAMK2G,PLCB2,PLCB3,CREB1,ATF2,CREB5,PRKACA,PRKACB,PRKACG,PRKCA,PRKCB,PRKCG,PDX1,ITPR3
Pathway	213307	Endocrine and other factor-regulated calcium reabsorption	KEGG	4.703e-09	1.194e-06	9.188e-09	5.62e-08	18	47	ESR1,ATP1A1,RAB11A,PLCB1,GNAQ,AP2M1,AP2S1,PLCB2,PLCB3,VDR,PRKACA,PRKACB,PRKACG,PRKCA,PRKCB,PRKCG,DNM1,DNM2
Pathway	83097	Alzheimer's disease	KEGG	7.861e-09	1.997e-06	1.524e-08	9.323e-08	37	171	MAPT,APAF1,FAS,ATF6,MT-CO2,SNCA,GAPDH,BAD,PLCB1,GNAQ,NOS1,CALM1,CALM2,CAPN1,CAPN2,CASP3,CASP7,CASP8,CASP9,GRIN1,GRIN2A,GRIN2D,GSK3B,CYCS,TNFRSF1A,CDK5,PLCB2,PLCB3,PPP3CA,PPP3CB,PPP3CC,PPP3R1,MAPK1,MAPK3,ITPR1,ITPR3,LRP1
Pathway	546258	Cocaine addiction	KEGG	1.024e-08	2.602e-06	1.971e-08	1.206e-07	18	49	ADCY5,FOSB,BDNF,NFKB1,GNAI1,GNAI3,GRIN1,GRIN2A,GRIN2D,CDK5,CREB1,ATF2,CREB5,PRKACA,PRKACB,PRKACG,JUN,RELA
Pathway	413400	Inositol phosphate metabolism, PI=> PIP2 => Ins(1,4,5)P3 => Ins(1,3,4,5)P4	KEGG	1.393e-08	3.539e-06	2.661e-08	1.627e-07	12	22	PIP5K1A,PIP5K1B,PLCB1,PLCD4,PIP5K1C,PIP5KL1,PLCB2,PLCB3,PLCD1,PLCG1,PLCG2,PLCZ1
Pathway	117292	RIG-I-like receptor signaling pathway	KEGG	3.866e-08	9.821e-06	7.329e-08	4.483e-07	21	70	MAP3K1,MAPK12,RIPK1,NFKB1,NFKBIA,MAP3K7,CASP8,TRAF3,TRAF6,CHUK,PIN1,MAPK14,ISG15,MAPK8,IKBKB,MAPK11,MAPK9,MAPK10,MAPK13,CYLD,RELA
Pathway	153376	Salivary secretion	KEGG	5.308e-08	1.348e-05	9.987e-08	6.109e-07	24	90	ADCY1,ADCY5,ADCY8,ADRB2,ADRB3,SLC9A1,ATP1A1,VAMP2,PLCB1,GNAQ,NOS1,CALM1,CALM2,PLCB2,PLCB3,PRKACA,PRKACB,PRKACG,PRKCA,PRKCB,PRKCG,PRKG1,ITPR1,ITPR3
Pathway	469200	Legionellosis	KEGG	8.166e-08	2.074e-05	1.525e-07	9.329e-07	18	55	APAF1,ARF1,MYD88,NFKB1,NFKBIA,CASP3,CASP7,CASP8,CASP9,TLR2,TLR4,CYCS,HSF1,HSPA6,HSPA8,VCP,ITGB2,RELA
Pathway	585563	Alcoholism	KEGG	1.058e-07	2.688e-05	1.962e-07	1.2e-06	36	180	SHC3,ADCY5,FOSB,SHC1,SHC4,ARAF,SOS1,SOS2,BDNF,BRAF,GNAI1,GNAI3,GNAO1,GNB2,NRAS,CALM1,CALM2,NTRK2,GRB2,GRIN1,GRIN2A,GRIN2D,SHC2,HRAS,CREB1,ATF2,CREB5,PPP1CC,PRKACA,MAPK1,MAPK3,MAP2K1,HDAC9,KRAS,RAF1,GNB4
Pathway	125138	Viral myocarditis	KEGG	2.724e-07	6.92e-05	5.014e-07	3.067e-06	18	59	ABL1,ABL2,ACTB,FYN,CCND1,CASP3,CASP8,CASP9,CAV1,CD28,CYCS,DAG1,ITGB2,DMD,RAC1,RAC2,RAC3,EIF4G1
Pathway	523016	Transcriptional misregulation in cancer	KEGG	3.251e-07	8.258e-05	5.941e-07	3.634e-06	35	180	MAX,ETV1,MEF2C,RXRG,MET,FOXO1,FLT1,FLT3,BIRC3,MYC,SP1,BCL2L1,BMI1,NFKB1,TCF3,NTRK1,TP53,CDKN1A,CDKN1B,TRAF1,CEBPB,PDGFA,WT1,IGF1R,CSF1R,IL3,ITGB7,DDIT3,PTK2,JUP,RARA,DUSP6,RELA,ELK4,SMAD1
Pathway	114227	Dorso-ventral axis formation	KEGG	4.228e-07	0.0001074	7.671e-07	4.692e-06	12	28	ETS1,ETS2,SOS1,SOS2,BRAF,NOTCH1,GRB2,MAPK1,MAPK3,MAP2K1,KRAS,EGFR
Pathway	835410	Thyroid hormone synthesis	KEGG	5.376e-07	0.0001366	9.685e-07	5.924e-06	20	74	ADCY1,ADCY5,ADCY8,ATP1A1,PLCB1,GNAQ,PLCB2,PLCB3,HSPA5,CREB1,ATF2,CREB5,PRKACA,PRKACB,PRKACG,PRKCA,PRKCB,PRKCG,ITPR1,ITPR3
Pathway	83055	p53 signaling pathway	KEGG	7.53e-07	0.0001913	1.347e-06	8.238e-06	19	69	MDM4,APAF1,FAS,CCND1,SFN,CASP3,CASP8,CASP9,CCNB1,THBS1,CYCS,CDK1,TP53,CDK2,CDKN1A,TSC2,CHEK1,PTEN,GADD45A
Pathway	101144	Prion diseases	KEGG	1.007e-06	0.0002558	1.789e-06	1.094e-05	13	35	FYN,SOD1,NOTCH1,HSPA5,PRKACA,PRKACB,PRKACG,MAPK1,MAPK3,MAP2K1,MAP2K2,EGR1,ELK1
Pathway	83064	TGF-beta signaling pathway	KEGG	1.151e-06	0.0002923	2.03e-06	1.242e-05	21	84	RPS6KB1,RPS6KB2,RHOA,MYC,SP1,BMP4,TGFB1,THBS1,CREBBP,PPP2CA,PPP2CB,PPP2R1A,PPP2R1B,MAPK1,MAPK3,EP300,SMAD1,SMAD2,SMAD3,SMAD4,SMAD7
Pathway	117293	Arrhythmogenic right ventricular cardiomyopathy (ARVC)	KEGG	6.632e-06	0.001685	1.162e-05	7.106e-05	18	72	ACTB,ACTN2,GJA1,CTNNA1,CTNNA2,CTNNB1,DAG1,ITGA6,ITGA2B,ITGA4,ITGA9,ITGAV,ITGB1,ITGB4,ITGB5,ITGB7,JUP,DMD
Pathway	83113	Basal cell carcinoma	KEGG	1.244e-05	0.00316	2.165e-05	0.0001324	15	55	FZD1,FZD7,FZD2,BMP4,GLI1,GLI2,GSK3B,TP53,WNT1,WNT5A,WNT11,CTNNB1,DVL1,DVL2,DVL3
Pathway	552665	Morphine addiction	KEGG	1.679e-05	0.004265	2.901e-05	0.0001775	20	91	ADCY1,ADCY5,ADCY8,GRK2,ARRB1,ARRB2,GNAI1,GNAI3,GNAO1,GNB2,CACNA1A,PDE3A,PDE3B,PRKACA,PRKACB,PRKACG,PRKCA,PRKCB,PRKCG,GNB4
Pathway	169306	Pancreatic secretion	KEGG	3.83e-05	0.009728	6.573e-05	0.0004021	20	96	ADCY1,ADCY5,ADCY8,RAB8A,RHOA,SLC9A1,ATP1A1,RAB11A,PLCB1,GNAQ,PLCB2,PLCB3,PRKCA,PRKCB,PRKCG,ITPR1,ITPR3,RAC1,RAP1A,RAP1B
Pathway	83063	Hedgehog signaling pathway	KEGG	3.994e-05	0.01014	6.808e-05	0.0004164	13	47	GRK2,ARRB1,ARRB2,CCND1,BCL2,GLI1,GLI2,BTRC,FBXW11,GSK3B,PRKACA,PRKACB,PRKACG
Pathway	194384	African trypanosomiasis	KEGG	4.27e-05	0.01085	7.23e-05	0.0004422	11	35	FAS,FASLG,MYD88,PLCB1,GNAQ,PLCB2,PLCB3,VCAM1,PRKCA,PRKCB,PRKCG
Pathway	121494	Dilated cardiomyopathy	KEGG	4.906e-05	0.01246	8.252e-05	0.0005047	19	90	ACTB,ADCY1,ADCY5,ADCY8,TGFB1,PRKACA,PRKACB,PRKACG,DAG1,ITGA6,ITGA2B,ITGA4,ITGA9,ITGAV,ITGB1,ITGB4,ITGB5,ITGB7,DMD
Pathway	842771	Inflammatory bowel disease (IBD)	KEGG	0.0001041	0.02643	0.0001739	0.001064	15	65	STAT1,STAT3,STAT4,STAT6,NFATC1,NFKB1,TGFB1,TLR2,TLR4,IL4,JUN,FOXP3,RELA,SMAD2,SMAD3
Pathway	170720	Carbohydrate digestion and absorption	KEGG	0.0004111	0.1044	0.000678	0.004147	11	44	AKT1,AKT2,PIK3R3,ATP1A1,PIK3CA,PIK3CB,PIK3CD,PIK3R2,PLCB2,PRKCB,AKT3
Pathway	143700	Vasopressin-regulated water reabsorption	KEGG	0.0004111	0.1044	0.000678	0.004147	11	44	ARHGDIA,ARHGDIB,ARHGDIG,RAB11A,STX4,VAMP2,CREB1,CREB5,PRKACA,PRKACB,PRKACG
Pathway	83068	ECM-receptor interaction	KEGG	0.0004872	0.1237	0.0007984	0.004883	16	82	SDC4,FN1,THBS1,CD36,CD44,HSPG2,DAG1,ITGA6,ITGA2B,ITGA4,ITGA9,ITGAV,ITGB1,ITGB4,ITGB5,ITGB7
Pathway	413389	Sphingosine degradation	KEGG	0.0005088	0.1292	0.0008285	0.005068	3	3	SPHK1,SGPL1,SPHK2
Pathway	377263	GABAergic synapse	KEGG	0.00109	0.2768	0.001756	0.01074	16	88	ADCY1,ADCY5,ADCY8,SRC,GNAI1,GNAI3,GNAO1,GNB2,CACNA1A,PRKACA,PRKACB,PRKACG,PRKCA,PRKCB,PRKCG,GNB4
Pathway	152665	Malaria	KEGG	0.001092	0.2774	0.001756	0.01074	11	49	MET,MYD88,TGFB1,THBS1,CD36,TLR2,TLR4,HGF,VCAM1,ITGB2,LRP1
Pathway	790011	Ovarian steroidogenesis	KEGG	0.001304	0.3312	0.002083	0.01274	11	50	ADCY1,ADCY5,ADCY8,ALOX5,PLA2G4A,IGF1R,PRKACA,PRKACB,PRKACG,INSR,PTGS2
Pathway	83056	Ubiquitin mediated proteolysis	KEGG	0.00198	0.5029	0.003143	0.01923	21	137	STUB1,BIRC6,MAP3K1,BIRC2,BIRC3,XIAP,SKP2,PIAS1,BRCA1,BTRC,FBXW11,NEDD4L,SOCS3,CBL,CBLB,TRAF6,UBE2L6,CBLC,UBE2E1,BIRC7,BIRC8
Pathway	193328	mRNA surveillance pathway	KEGG	0.004141	1	0.006532	0.03996	15	91	PABPC1,WDR82,PPP1CC,PPP2CA,PPP2CB,PPP2R1A,PPP2R1B,PPP2R2A,PPP2R2B,PPP2R2C,PPP2R3A,PPP2R5A,PPP2R5C,PPP2R5D,BCL2L2-PABPN1
Pathway	83100	Huntington's disease	KEGG	0.007794	1	0.01222	0.07474	25	193	APAF1,MT-CO2,SOD1,SOD2,SP1,BDNF,PPARGC1A,PLCB1,GNAQ,CASP3,CASP8,CASP9,GRIN1,CYCS,TP53,HTT,AP2M1,AP2S1,PLCB2,PLCB3,CREB1,CREBBP,CREB5,ITPR1,EP300
Pathway	82994	Sphingolipid metabolism	KEGG	0.009172	1	0.01429	0.08742	9	47	PLPP1,PLPP2,PLPP3,SPHK1,SGPL1,UGCG,SGPP2,SPHK2,SGPP1
Pathway	114229	Hypertrophic cardiomyopathy (HCM)	KEGG	0.0112	1	0.01734	0.1061	13	83	ACTB,TGFB1,DAG1,ITGA6,ITGA2B,ITGA4,ITGA9,ITGAV,ITGB1,ITGB4,ITGB5,ITGB7,DMD
Pathway	167325	Protein processing in endoplasmic reticulum	KEGG	0.01783	1	0.02745	0.1679	21	166	STUB1,MAP3K5,ATF6,MBTPS1,HSPH1,BAG1,BCL2,NFE2L2,CAPN1,CAPN2,HSPA5,HSPA6,HSPA8,VCP,HSP90AA1,HSP90AB1,MAPK8,MAPK9,MAPK10,MAP2K7,DDIT3
Pathway	200309	Rheumatoid arthritis	KEGG	0.02115	1	0.03236	0.1979	13	90	FLT1,ANGPT1,FOS,TNFSF11,TNFRSF11A,TEK,TGFB1,CD28,TLR2,TLR4,VEGFA,ITGB2,JUN
Pathway	1393107	Hippo signaling pathway -multiple species	KEGG	0.02181	1	0.03317	0.2029	6	29	YAP1,STK3,NF2,RASSF1,PAK1,RASSF2
Pathway	83098	Parkinson's disease	KEGG	0.02639	1	0.0399	0.244	18	142	ADCY5,APAF1,MT-CO2,MT-ND2,SNCA,GNAI1,GNAI3,HTRA2,CASP3,CASP9,CYCS,UBE2L6,PARK7,UBB,PRKACA,PRKACB,PRKACG,PINK1
Pathway	153910	Phagosome	KEGG	0.0295	1	0.04433	0.2712	19	154	NCF1,ACTB,EEA1,NCF2,NCF4,NOS1,THBS1,CD36,TLR2,TLR4,PIK3C3,CYBA,CYBB,ITGAV,ITGB1,ITGB2,ITGB5,RAC1,PIKFYVE
Pathway	83062	Notch signaling pathway	KEGG	0.03003	1	0.04487	0.2744	8	48	KAT2B,NOTCH1,CREBBP,NCOR2,DVL1,DVL2,DVL3,EP300
