# Supplementary material for: Classification of potential pathways affecting the VEGF pathway in glioblastoma multiforme (GBM) recurrent: A bioinformatics study based on differentially expressed- microRNAs
Source: Research Square preprint supplement (doi:10.21203/rs.3.rs-677315/v1), 2021-07-08
Supplement: Supplementary file 2 [file 40a942e7596a35f2cf26ca14.xlsx]

## Sheet: Sheet1
DOWN (DEmiRs)	UP (DEmiRs)	VEGF 3UTR	VEGF 5UTR	VEGF CDS	Common miRs between VEGF pathway and DE-miRNAs
hsa-miR-129-2-3p	hsa-miR-320a	hsa-miR-17-5p	hsa-miR-519d-3p	hsa-miR-30a-5p	hsa-miR-17-5p
hsa-miR-663a	hsa-miR-1305	hsa-miR-20a-5p	hsa-miR-221-3p	hsa-miR-145-5p	hsa-miR-204-5p
hsa-miR-451a	hsa-miR-31-3p	hsa-miR-204-5p	hsa-miR-221-3p	hsa-miR-145-5p	hsa-miR-195-5p
hsa-miR-21-5p	hsa-miR-222-3p	hsa-miR-211-5p	hsa-miR-503-5p	hsa-miR-145-5p	hsa-miR-497-5p
hsa-miR-363-3p	hsa-miR-31-5p	hsa-miR-20b-5p	hsa-miR-103a-3p	hsa-miR-145-5p	hsa-let-7a-5p
hsa-miR-551b-3p	hsa-miR-221-3p	hsa-miR-195-5p	hsa-miR-503-5p	hsa-miR-26b-5p	hsa-miR-221-3p
hsa-miR-136-5p	hsa-miR-224-5p	hsa-miR-106b-5p	hsa-miR-27a-3p	hsa-miR-372-3p	hsa-miR-26b-5p
hsa-miR-204-5p	hsa-miR-25-3p	hsa-miR-299-3p	hsa-miR-34c-5p	hsa-miR-373-3p	hsa-miR-21-5p
hsa-let-7a-5p	hsa-miR-193b-3p	hsa-miR-302d-3p		hsa-miR-29a-3p
hsa-miR-125b-5p	hsa-miR-93-5p	hsa-miR-106b-5p		hsa-miR-152-3p
hsa-let-7f-5p	hsa-miR-21-3p	hsa-miR-299-3p		hsa-miR-152-3p
hsa-miR-26b-5p	hsa-miR-196a-5p	hsa-miR-106b-5p		hsa-miR-30a-5p
hsa-miR-335-5p	hsa-miR-17-5p	hsa-miR-299-3p		hsa-miR-30a-5p
hsa-miR-101-3p	hsa-miR-196b-5p	hsa-miR-106b-5p		hsa-miR-30a-5p
hsa-miR-99a-5p	hsa-miR-10a-5p	hsa-miR-299-3p		hsa-miR-486-5p
hsa-miR-135a-5p	hsa-miR-424-5p	hsa-miR-106b-5p		hsa-miR-21-5p
hsa-miR-9-5p	hsa-miR-1246	hsa-miR-299-3p		hsa-miR-486-5p
hsa-miR-181a-5p	hsa-miR-130b-3p	hsa-miR-106b-5p		hsa-miR-145-5p
hsa-mR-9-3p	hsa-miR-18a-5p	hsa-miR-299-3p		hsa-miR-429
hsa-miR-126-3p	hsa-miR-1260a	hsa-miR-106b-5p		hsa-miR-429
hsa-miR-195-5p	hsa-miR-365a-3p	hsa-miR-299-3p		hsa-miR-378a-3p
hsa-miR-144-5p	hsa-miR-324-3p	hsa-miR-106b-5p		hsa-miR-30d-5p
hsa-miR-497-5p		hsa-miR-299-3p
hsa-miR-124-3p		hsa-miR-106b-5p
hsa-miR-181c-5p		hsa-miR-299-3p
hsa-miR-223-3p		hsa-miR-106b-5p
hsa-miR-144-3p		hsa-miR-299-3p
hsa-miR-142-3p		hsa-miR-106b-5p
hsa-miR-142-5p		hsa-miR-299-3p
		hsa-miR-106b-5p
		hsa-miR-299-3p
		hsa-miR-106b-5p
		hsa-miR-299-3p
		hsa-miR-106b-5p
		hsa-miR-299-3p
		hsa-miR-106b-5p
		hsa-miR-299-3p
		hsa-miR-106b-5p
		hsa-miR-299-3p
		hsa-miR-106b-5p
		hsa-miR-299-3p
		hsa-miR-16-5p
		hsa-miR-20a-5p
		hsa-miR-195-5p
		hsa-miR-302d-3p
		hsa-miR-185-5p
		hsa-miR-185-5p
		hsa-miR-7-5p
		hsa-miR-7-5p
		hsa-miR-519d-3p
		hsa-miR-6838-5p
		hsa-miR-15b-5p
		hsa-miR-519d-3p
		hsa-miR-519d-3p
		hsa-miR-6838-5p
		hsa-miR-519d-3p
		hsa-miR-519d-3p
		hsa-miR-103a-3p
		hsa-miR-107
		hsa-miR-107
		hsa-miR-128-3p
		hsa-miR-448
		hsa-miR-497-5p
		hsa-miR-107
		hsa-miR-128-3p
		hsa-miR-448
		hsa-miR-497-5p
		hsa-miR-103a-3p
		hsa-miR-107
		hsa-miR-107
		hsa-miR-128-3p
		hsa-miR-448
		hsa-miR-497-5p
		hsa-miR-107
		hsa-miR-486-5p
		hsa-miR-103a-3p
		hsa-miR-107
		hsa-miR-107
		hsa-miR-486-5p
		hsa-miR-24-3p
		hsa-miR-143-3p
		hsa-miR-143-3p
		hsa-miR-27a-3p
		hsa-miR-143-3p
		hsa-miR-877-5p
		hsa-miR-877-5p
		hsa-miR-134-5p
		hsa-miR-877-5p
		hsa-let-7a-5p
		hsa-let-7b-5p
		hsa-miR-150-5p
		hsa-miR-519d-3p
		hsa-miR-20a-5p
		hsa-miR-130a-3p
		hsa-miR-106b-5p
		hsa-miR-106b-5p
		hsa-miR-526b-3p
		hsa-miR-4770
		hsa-miR-497-5p
		hsa-miR-34a-5p
		hsa-miR-19a-3p
		hsa-miR-148b-3p
