# Supplementary material for: Classification of potential pathways affecting the VEGF pathway in glioblastoma multiforme (GBM) recurrent: A bioinformatics study based on differentially expressed- microRNAs
Source: Research Square preprint supplement (doi:10.21203/rs.3.rs-677315/v1), 2021-07-08
Supplement: Supplementary file 4 [file bbaa8316158372b1f0405943.docx]

| **The pathways ( common between DEmiRNAs & connections)** | **The pathways (common between DEmiRNAs &overlapping)** | **class** | **map** |
| --- | --- | --- | --- |
| MAPK signaling pathway | MAPK signaling pathway | Signal transduction | map04010 |
| ErbB signaling pathway | ErbB signaling pathway | Signal transduction | map04012 |
| PI3K-Akt signaling pathway | PI3K-Akt signaling pathway | Signal transduction | map04151 |
| Sphingolipid signaling pathway | Sphingolipid signaling pathway | Signal transduction | map04071 |
| FoxO signaling pathway | FoxO signaling pathway | Signal transduction | map04068 |
| mTOR signaling pathway | mTOR signaling pathway | Signal transduction | map04150 |
| Wnt signaling pathway | Wnt signaling pathway | Signal transduction | map04310 |
| HIF-1 signaling pathway | HIF-1 signaling pathway | Signal transduction | map04066 |
| TNF signaling pathway | TNF signaling pathway | Signal transduction | map04668 |
| AMPK signaling pathway | AMPK signaling pathway | Signal transduction | map04152 |
| Phosphatidylinositol signaling system | Phosphatidylinositol signaling system | Signal transduction | map04070 |
|  | Hippo signaling pathway | Signal transduction | map04390 |
|  | TGF-beta signaling pathway | Signal transduction | map04350 |
|  | VEGF signaling pathway | Signal transduction | map04370 |
|  | NF-kappa B signaling pathway | Signal transduction | map04064 |
| Prostate cancer | Prostate cancer | Cancer: specific types | map05215 |
| Chronic myeloid leukemia | Chronic myeloid leukemia | Cancer: specific types | map05220 |
| Glioma | Glioma | Cancer: specific types | map05214 |
| Pancreatic cancer | Pancreatic cancer | Cancer: specific types | map05212 |
| Renal cell carcinoma | Renal cell carcinoma | Cancer: specific types | map05211 |
| Non-small cell lung cancer | Non-small cell lung cancer | Cancer: specific types | map05223 |
| Colorectal cancer | Colorectal cancer | Cancer: specific types | map05210 |
| Acute myeloid leukemia | Acute myeloid leukemia | Cancer: specific types | map05221 |
| Endometrial cancer | Endometrial cancer | Cancer: specific types | map05213 |
| Small cell lung cancer | Small cell lung cancer | Cancer: specific types | map05222 |
| Melanoma | Melanoma | Cancer: specific types | map05218 |
| Bladder cancer | Bladder cancer | Cancer: specific types | map05219 |
| Thyroid cancer | Thyroid cancer | Cancer: specific types | map05216 |
| Pathways in cancer | Pathways in cancer | Cancer: overview | map05200 |
| Proteoglycans in cancer | Proteoglycans in cancer | Cancer: overview | map05205 |
| Viral carcinogenesis | Viral carcinogenesis | Cancer: overview | map05203 |
| Central carbon metabolism in cancer | Central carbon metabolism in cancer | Cancer: overview | map05230 |
| Choline metabolism in cancer | Choline metabolism in cancer | Cancer: overview | map05231 |
| MicroRNAs in cancer | MicroRNAs in cancer | Cancer: overview | map05206 |
|  | Transcriptional misregulation in cancer | Cancer: overview | map05202 |
| Insulin signaling pathway | Insulin signaling pathway | Endocrine system | map04910 |
| Thyroid hormone signaling pathway | Thyroid hormone signaling pathway | Endocrine system | map04919 |
| Estrogen signaling pathway | Estrogen signaling pathway | Endocrine system | map04915 |
| Progesterone-mediated oocyte maturation | Progesterone-mediated oocyte maturation | Endocrine system | map04914 |
| Oxytocin signaling pathway | Oxytocin signaling pathway | Endocrine system | map04921 |
| Prolactin signaling pathway | Prolactin signaling pathway | Endocrine system | map04917 |
|  | Adipocytokine signaling pathway | Endocrine system | map04920 |
|  | Thyroid hormone synthesis | Endocrine system | map04918 |
| Hepatitis B | Hepatitis B | Infectious disease: viral | map05161 |
| HTLV-I infection | HTLV-I infection | Infectious disease: viral | map05166 |
| Epstein-Barr virus infection | Epstein-Barr virus infection | Infectious disease: viral | map05169 |
| Hepatitis C | Hepatitis C | Infectious disease: viral | map05160 |
| Measles | Measles | Infectious disease: viral | map05162 |
| Focal adhesion | Focal adhesion | Cellular community - eukaryotes | map04510 |
| Adherens junction | Adherens junction | Cellular community - eukaryotes | map04520 |
| Gap junction | Gap junction | Cellular community - eukaryotes | map04540 |
| Signaling pathways regulating pluripotency of stem cells | Signaling pathways regulating pluripotency of stem cells | Cellular community - eukaryotes | map04550 |
| Bacterial invasion of epithelial cells | Bacterial invasion of epithelial cells | Infectious disease: bacterial | map05100 |
| Shigellosis | Shigellosis | Infectious disease: bacterial | map05131 |
| Epithelial cell signaling in Helicobacter pylori infection | Epithelial cell signaling in Helicobacter pylori infection | Infectious disease: bacterial | map05120 |
| Salmonella infection | Salmonella infection | Infectious disease: bacterial | map05132 |
|  | Pathogenic Escherichia coli infection | Infectious disease: bacterial | map05130 |
|  | Legionellosis | Infectious disease: bacterial | map05134 |
| Apoptosis | Apoptosis | Cell growth and death | map04210 |
| Oocyte meiosis | Oocyte meiosis | Cell growth and death | map04114 |
|  | Cell cycle | Cell growth and death | map04110 |
|  | p53 signaling pathway | Cell growth and death | map04115 |
|  | Parkinson's disease | Neurodegenerative disease | map05012 |
|  | Huntington's disease | Neurodegenerative disease | map05016 |
|  | Prion diseases | Neurodegenerative disease | map05020 |
| Neurotrophin signaling pathway | Neurotrophin signaling pathway | Nervous system | map04722 |
| Long-term depression | Long-term depression | Nervous system | map04730 |
|  | Arrhythmogenic right ventricular cardiomyopathy (ARVC) | Cardiovascular disease | map05412 |
|  | Viral myocarditis | Cardiovascular disease | map05416 |
| Platelet activation | Platelet activation | Immune system | map04611 |
| Leukocyte transendothelial migration | Leukocyte transendothelial migration | Immune system | map04670 |
|  | B cell receptor signaling pathway | Immune system | map04662 |
|  | Dorso-ventral axis formation | Development and regeneration | map04320 |
| Axon guidance | Axon guidance | Development and regeneration | map04360 |
|  | Malaria | Infectious disease: parasitic | map05144 |
| Chagas disease (American trypanosomiasis) | Chagas disease (American trypanosomiasis) | Infectious disease: parasitic | map05142 |
|  | Protein processing in endoplasmic reticulum | Folding, sorting and degradation | map04141 |
|  | Ubiquitin mediated proteolysis | Folding, sorting and degradation | map04120 |
|  | Endocytosis | Transport and catabolism | map04144 |
|  | Phagosome | Transport and catabolism | map04145 |
| Regulation of actin cytoskeleton | Regulation of actin cytoskeleton | Cell motility | map04810 |
| Adrenergic signaling in cardiomyocytes | Adrenergic signaling in cardiomyocytes | Circulatory system | map04261 |
| Type II diabetes mellitus | Type II diabetes mellitus | Endocrine and metabolic disease | map04930 |
| Aldosterone-regulated sodium reabsorption | Aldosterone-regulated sodium reabsorption | Excretory system | map04960 |
|  | ECM-receptor interaction | Signaling molecules and interaction | map04512 |
|  | Sphingolipid metabolism | Lipid metabolism | map00600 |
|  | mRNA surveillance pathway | Translation | map03015 |
|  | Circadian entrainment | Environmental adaptation | map04713 |
|  | Salivary secretion | Digestive system | map04970 |
|  | Inositol phosphate metabolism | Carbohydrate metabolism | map00562 |
|  | Cocaine addiction | Substance dependence | map05030 |
