# Supplementary material for: Classification of potential pathways affecting the VEGF pathway in glioblastoma multiforme (GBM) recurrent: A bioinformatics study based on differentially expressed- microRNAs
Source: Research Square preprint supplement (doi:10.21203/rs.3.rs-677315/v1), 2021-07-08
Supplement: Supplementary file 6 [file 8078d37d5cd3b4d746f59b3b.xlsx]

## Sheet: Sheet1
MAPK12
MAPK1
MAPK13
MAPK14
PXN
PLCG1
RAC2
HSPB1
RAF1
KRAS
MAPK3
AKT3
KDR
PIK3CA
AKT1
PIK3CB
MAP2K1
RAC3
PRKCB
HRAS
CDC42
MAPK11
PTK2
RAC1
SRC
PLCG2
NRAS
PIK3CD
AKT2
PRKCA
PPP3R1
PDGFRB
MAP2K2
SHC2
EGFR
IGF1R
ERBB2
PAK1
BAD
YWHAZ
NOS3
YES1
PTPN11
CASP9
UBC
FYN
LCK
PIK3CG
JAK1
MAPK8
PTEN
PPP3CA
PPP3CB
VEGFA
NFATC2
SOS1
JAK2
RHOA
ABL1
LYN
ESR1
NFKB1
YWHAQ
DUSP1
GNAO1
PIK3R3
YWHAE
FLT1
CBL
BRAF
IQGAP1
YWHAB
PAK2
SPHK1
FOS
IRS1
GRB2
BCL2
MET
GNAI1
PDPK1
HSP90AA1
PRKCD
JUN
SYK
HCK
PTGS2
GNAI3
MAP3K1
JAK3
NFKBIA
YWHAH
RAP1B
RRAS
CCND1
RPS6KB1
PLCB2
PIK3R2
ATF2
ERBB3
PRKCG
YWHAG
KIT
NCK1
TP53
SP1
CRK
CTNNB1
ILK
RAP1A
RET
MAPKAPK3
SFN
MAPKAPK2
MTOR
FGR
EIF4EBP1
PAK3
RALGDS
PPP2CA
CSK
DUSP16
DUSP3
SPHK2
SOS2
RALBP1
JUND
GAB1
GNB4
DUSP4
FLT4
CREBBP
RHOB
DOCK1
INSR
PRKCE
CASP3
DUSP6
DUSP8
PTPN7
GNB2
MEF2D
PTPRR
DUSP2
STAT3
EPHA2
GSK3B
PPP2R1A
PRKCZ
VAV1
RALA
CDC37
EGR1
TSC2
PDGFRA
ARRB2
PLCB3
ARAP2
PAK6
RHOC
NCF1
TRIO
CAV1
PAK5
STK11
ARHGAP6
SH2D2A
PTPN5
STAT1
GAB2
DUSP10
DUSP5
EPHB2
TEK
ARHGAP5
NCF4
EPHB1
ITK
SHC1
DUSP7
TNS1
DECR1
CHN2
ARHGDIB
ECT2
KALRN
PARD6A
ARHGDIG
SH3PXD2A
PLD2
HSP90AB1
ASAP1
INPPL1
SHOC2
MAPK10
ERBB4
PLCB1
INPP5D
OCRL
MAP3K5
MEF2C
MEF2A
PAK4
MKNK1
ARAF
ARAP1
ARHGAP35
CHN1
ARRB1
RPS6KA2
ELK1
SMAD2
PPP3CC
EP300
RB1
PIP5K1B
IQGAP2
SLC9A1
ARHGDIA
NGEF
PLXNB1
BCL2L1
RASA1
PIK3C2G
PRKCQ
SH3PXD2B
RACGAP1
FOSL1
FOSB
FOSL2
BLK
CDC25B
JUNB
NOS2
PIP5K1C
ARHGEF3
ARHGEF1
ARHGEF4
SYNJ2
PARD6G
SRGAP1
NET1
GJA1
PLA2G4A
PIP5K1A
IRS2
RICTOR
FOXO3
CHUK
DNM1
PPP2R2A
MBP
CDK1
RPS6KA4
ETS2
IQGAP3
AKAP13
ACTA1
ARHGEF11
PARD6B
VAV2
AR
ARHGEF7
PLEKHG5
ARHGEF16
RPS6KA3
PTPRA
ITSN1
MLLT4
MAP3K4
TRIP6
VCL
ARAP3
PHLPP1
NCK2
GNA15
RRAS2
MAP2K4
CCNB1
RARA
PLCZ1
ABR
ARHGAP36
ARHGAP31
ARHGAP26
DOCK2
ARF6
ETS1
ARHGAP9
ACTN1
GIT1
ARHGEF12
CTNND1
BCAR1
FGFR1
SYNJ1
LAMTOR3
MCF2
IKBKB
RPS6KA1
ARHGAP15
ARHGAP29
TIAM1
ASAP2
RPS27A
WASL
BCR
PRKCI
MITF
SOCS3
PTPN12
ITGB1
EZR
PLD1
SH3RF1
TLR2
TERT
PTK2B
KHDRBS1
PRKCH
HIF1A
TRAF6
CAPN2
ESR2
NOTCH1
IKZF3
PIP4K2C
IRS4
INPP5E
PIP4K2A
INPP5B
INSRR
APPL1
MYO1C
FOXO1
RPTOR
FOXO4
TSC1
FKBP1A
AP2M1
CABIN1
NFATC1
CALM1
ELAVL1
TEC
MLST8
PRKACA
ARHGAP45
RHOT2
SMAD3
ARHGAP10
OPHN1
XIAP
MYO9A
ELK4
RHOT1
MAP3K3
ARHGAP11A
NCF2
SGK1
MAP3K7
TLR4
MUSK
CTTN
SPRY2
DVL1
GDI2
SRGAP3
PIP5KL1
TGFB1I1
ARHGAP24
MYO9B
SH3KBP1
CAMK2A
RELA
TCL1A
CREB1
PLCD4
DCC
MAPK9
ARHGAP11B
GNA13
PPP2R5C
PPIA
CDK5
SH3BP2
DAPP1
RACK1
PLCD1
MAP2K6
GNA11
TAB1
PPP2CB
LCP2
BLNK
EPOR
TGFB1
ACTN4
HMOX1
RHEB
MAP3K8
KAT2B
CDKN1A
CDKN1B
BCL2L2
GAPDH
SIRT1
ARFIP2
TRIB3
MAPKAP1
TEP1
AGTR1
ARHGAP22
LPIN1
RPS6KA6
RGL1
ARFGAP3
RASA2
SGPP1
PLPP1
UBB
ARHGAP17
ARHGAP1
ARHGEF6
CDH1
CLIP1
DOCK11
DOCK6
MAP4K2
MAP3K11
CTNNA1
ACTR3
BIRC2
CYCS
RALB
SRF
TLN1
DAG1
PTPN23
ITGAV
ITGB4
NOXA1
FN1
EXOC1
BAIAP2
EPHB3
ARFGAP1
DOCK7
ELMO1
EXOC7
ARHGEF25
DVL2
VCAM1
PHC2
PGR
STAT5B
MAP3K2
S1PR1
SNCA
STAT5A
SHC4
ZAP70
USP8
DNM2
CDH5
GRIN2A
PIK3C3
BTK
PIK3C2A
NF1
RASA3
RIN1
RASGRP2
PDGFB
NRP1
ANGPT2
AKT1S1
SLC2A4
PRKDC
TCL1B
PPP2R5A
PPP2R2C
PPP2R3A
PPP4R2
WDR82
AKAP5
FOXP3
SDC4
PEBP1
GRK2
CHEK1
MKNK2
CDK2
ARF1
NTRK2
GNAQ
MRAS
ATP1A1
CDC25A
CEBPB
PPP2R1B
SGPP2
CDC25C
PLPP2
PPP2R2B
RHOG
KSR2
SMAD4
HMGB1
NF2
MAP2K3
GATA2
CRKL
OCLN
CREB5
EPHB4
CASP8
PTPA
WASF1
RXRG
MSN
PEA15
NTRK3
GLI2
DMD
ACTN2
AGT
PIK3C2B
UTRN
MYO6
VAV3
PLPP3
PTPN1
NCOA3
SPTAN1
SGPL1
PIM1
GSN
PRKG1
DOCK9
GNA14
BMI1
SHB
MYC
RASSF2
ISG15
NEDD9
TNK2
SPATA13
BCL2L11
PLXNA1
MATK
LAT
ITGA4
PAFAH1B1
MAP2K7
GRB10
MYO5A
ETV1
ARHGAP25
UBA52
PIK3R5
PTPRJ
BRAP
RASGRF1
DOCK8
FGFR2
ROBO1
SLIT2
LPXN
GHR
RPA3
HSPA8
STUB1
PPP5C
PIN1
RANBP9
BMP4
IL4
FOXN1
GLI1
SMAD7
ATXN1
PIKFYVE
MXD1
GSK3A
RNF11
FLT3
VIM
TOPBP1
SOD1
MAPK8IP1
MYH14
CALM2
GUCY1B3
NTRK1
CD19
MCF2L
MAP3K9
WWOX
MYO3A
MYO1A
ITGB7
RABGEF1
GRB14
DAB2IP
GRIN2D
RIN2
ADCY1
HGF
LGALS1
SPRY3
RGL4
CSF1R
RAPGEF2
RASA4
CDC42EP2
FNBP1L
CDC42EP3
DOCK10
ARL8B
AURKC
ARL8A
GEM
PLK1
BNIP2
CDC42EP1
VASP
ARHGAP32
BIRC5
BIRC3
BIRC7
EIF4A1
NOD1
ITGB2
ITGB5
PIAS1
STX4
WNT1
FZD2
NME1
WNT5A
RAP1GDS1
ARHGEF5
WNT11
RAB8A
ABI2
EXOC2
ELMO2
VAMP2
RTKN
FZD7
FHOD1
HACE1
DVL3
EXOC4
PREX2
RAB10
FZD1
CYBA
EXOC6
ALS2
RELB
DEF6
PLXNA4
CAPN1
CDCP1
FHIT
MAPK8IP3
TNFSF11
CAV3
LRP1
PEMT
EPHA3
HNF1A
BMX
EFNB2
JUP
ADRB3
PTPN21
PELP1
TRPV4
DOK1
EPS8
FARP2
MED28
PLSCR1
ENO1
ADRB2
FAS
CNTNAP1
TRPC6
STAT6
AFAP1L2
SH2D3C
CD63
SYN1
CAV2
CARM1
EFNB3
EFNB1
ADAM15
TRAT1
CBLC
DOK2
EFNA5
TLR3
EPHA5
TNFRSF1A
S1PR3
EPHA1
PTGER4
AHR
KCNA5
NR0B2
F2RL2
EPHA4
HCLS1
CD36
CBLB
ARPC5
HNRNPA0
TCF3
KAT5
PTGIS
MT-CO2
IGFBP7
EPAS1
CTGF
NRP2
SIRPG
GPC1
SPARC
ADAMTS1
VEGFB
THBS1
MYH4
EXOC3
RHOQ
MYH2
RAB11A
RAB14
PPP1CC
RCAN2
RCAN1
IRF4
TAF9
IRF2BP2
NFATC2IP
HIST1H1A
PICK1
GRAP
NFE2L2
PPP1R14A
ADCY8
NOS1
TBXA2R
SNTA1
GORASP2
MYL12B
MKKS
CAPNS1
VIL1
RPA1
PEBP4
HTRA2
RIPK1
PPP1R12A
SPAG9
NUP153
PKD1
ITGA2B
PPARA
EEF2K
AP2S1
TXK
HERC5
ITGA9
TYK2
PPARGC1A
FBXW11
BLVRA
PRKAR2A
PRKAR2B
DAXX
SKP2
DLC1
MYL9
PPP4C
HSPB8
PDE3B
YAP1
UBE2L6
PSMC2
KRT8
PSMD6
MST1R
IL3
NPM1
HSPA9
VEGFD
WDFY2
PSMC3
GREM1
PHB
HSPBAP1
UBTF
SP7
PA2G4
HSPA4
CCDC8
HSPB3
UBE2E1
SMAD1
ITPR1
RPS6KB2
CYLD
HSPA6
RASGRP1
GH1
TESPA1
PABPC1
TSC22D3
ZHX2
DNMBP
RHOJ
PITPNA
EEA1
HSPH1
CAMK2G
EZH2
TRIP10
EPN2
WIPF2
A2M
HSPA5
ZYX
CD28
DIRAS1
FLNC
PPM1A
WT1
FMN1
PARVA
FGD3
ZFP36L1
EIF4G1
CCDC88A
FOXG1
ERAS
CAMK2D
LIMK2
PARK7
MAPT
FOXM1
MBTPS1
SPRY4
E2F1
SCNN1B
ANXA2
PDGFA
HTT
ITSN2
GIT2
COL18A1
SREBF1
RBCK1
RASSF1
ACTB
DAPK1
STAT4
PRKAR1A
MAX
VCP
NCOA6
PDE3A
DNMT1
WIPF1
2020-09-02
CACNA1A
PRKAR1B
NR4A1
MAP2
CLIP3
NCKAP1
CNKSR1
ARHGEF2
NRG2
MT-ND2
SORBS1
CDC42BPA
RPS6KC1
SOD2
PFKFB2
MDM4
RNF2
FASLG
ATF6
EFNA1
RAB13
ADAM12
FLG
THEM4
MCL1
EPHA7
CASP7
FLNA
BTRC
PRKACB
PSMA7
GADD45A
GRIN1
KCNB1
IFIT1
RAPGEF1
MPL
YBX1
FOXO6
PTPRT
PPA1
TRAF1
RPA2
UGCG
ITPR3
ALOX5
HSPG2
ABCA1
PARD3
PINK1
FGD1
DIRAS2
SHC3
HNRNPK
GATA1
WAS
EDNRB
PRKACG
ERRFI1
TBC1D4
CYBB
NPHS1
CNKSR2
ARHGAP44
RPS6
ERBIN
PDX1
SOD3
AFAP1
SH3BP5
ALK
FANCA
EPHA6
PKP4
SPHKAP
TRAF3
AKTIP
CAMK2B
MYH11
ARHGAP21
CARD11
KHSRP
DIAPH3
NEDD4L
NCOR2
CSF2RB
OBSL1
FOXP2
RGS14
ITGA6
NFATC4
EXOC5
STK3
PTPN6
BIRC6
NOSTRIN
PTPN13
DIABLO
CD44
MYD88
WEE1
GRB7
EPN1
HDAC9
STMN1
DGKZ
BIRC8
FNBP1
MST1
BDNF
PPP2R5D
CTNNA2
BRCA1
ADCY5
RGL2
BAG1
PDK2
PAQR3
ABL2
ANGPT1
HSF1
BRK1
LTB4R2
PSMD9
EGR4
LIMS1
MYL6
VDR
DDIT3
APAF1
RASAL1
PGF
BCL2L2-PABPN1
TNFRSF11A
RASGRP4
