# Supplementary material for: Classification of potential pathways affecting the VEGF pathway in glioblastoma multiforme (GBM) recurrent: A bioinformatics study based on differentially expressed- microRNAs
Source: Research Square preprint supplement (doi:10.21203/rs.3.rs-677315/v1), 2021-07-08
Supplement: Supplementary file 7 [file d69d856dd58e87e6f7c3adb4.xlsx]

## Sheet: Total
ID	adj.P.Val	P.Value	t	B	logFC	miRNA_ID	SPOT_ID
hsa-miR-142-3p	4.59e-19	4.77e-22	-37.2572	40.0791	-4.82885	hsa-miR-142-3p
hsa-miR-451	1.31e-15	2.73e-18	-25.3372	31.9378	-9.43754	hsa-miR-451
hsa-miR-144	1.1e-14	3.45e-17	-22.5921	29.4566	-4.23411	hsa-miR-144
hsa-miR-324-3p	4.4e-14	1.83e-16	20.9363	27.806	2.46528	hsa-miR-324-3p
hsa-miR-142-5p	1.02e-11	5.31e-14	-16.0936	22.1316	-1.35659	hsa-miR-142-5p
hur_5	1.94e-10	1.21e-12	13.8589	18.9686	2.65525		control
hsa-miR-223	2.14e-09	1.56e-11	-12.2209	16.3688	-3.14051	hsa-miR-223
mr_1	4.08e-09	3.4e-11	11.7526	15.5759	3.78895		control
hsa-miR-765	4.54e-09	4.25e-11	-11.6203	15.3475	-1.09286	hsa-miR-765
hcmv-miR-UL70-3p	1.15e-08	1.22e-10	-11.013	14.2743	-1.588	hcmv-miR-UL70-3p	NA
hsa-miR-1274a	1.15e-08	1.32e-10	10.9685	14.1939	3.92713	hsa-miR-1274a
hsa-miR-659	1.59e-08	1.98e-10	-10.7399	13.7778	-0.261012	hsa-miR-659
hsa-miR-557	3.79e-08	5.13e-10	-10.2203	12.8089	-0.540964	hsa-miR-557
hsa-miR-181c	4.33e-08	6.3e-10	-10.1095	12.5981	-1.31969	hsa-miR-181c
hsa-miR-146b-5p	4.82e-08	7.52e-10	-10.0157	12.4183	-1.57801	hsa-miR-146b-5p
dmr_6	5.48e-08	9.59e-10	-9.88678	12.1696	-4.8915		control
dmr_285	5.48e-08	9.7e-10	-9.88075	12.1579	-1.31161		control
dmr_3	6.31e-08	1.18e-09	-9.77708	11.9563	-4.59356		control
hsa-miR-1260	7.74e-08	1.53e-09	9.64262	11.6927	2.58968	hsa-miR-1260
SCorner3	8.44e-08	1.76e-09	-9.57111	11.5516	-4.57726		control
hsa-miR-936	8.97e-08	1.96e-09	-9.51493	11.4403	-0.407246	hsa-miR-936
hiv1-miR-H1	8.98e-08	2.06e-09	-9.49018	11.3912	-0.620318	hiv1-miR-H1	NA
hsa-miR-124	1.04e-07	2.49e-09	-9.39219	11.1957	-4.22929	hsa-miR-124
hsa-miR-1280	1.46e-07	3.66e-09	9.19733	10.8034	1.67932	hsa-miR-1280
hsa-miR-497	2e-07	5.21e-09	-9.02016	10.4424	-2.48947	hsa-miR-497
hsa-miR-320a	2.12e-07	5.73e-09	8.97264	10.3449	1.19468	hsa-miR-320a
dmr_31a	3.3e-07	9.26e-09	-8.7364	9.8556	-0.415686		control
hsa-miR-1182	4.4e-07	1.28e-08	-8.57781	9.5231	-0.418817	hsa-miR-1182
hsa-miR-144*	4.69e-07	1.42e-08	-8.52995	9.4221	-1.70907	hsa-miR-144*
hsa-miR-1305	5.73e-07	1.79e-08	8.4175	9.1835	2.12368	hsa-miR-1305
hsa-miR-671-5p	5.91e-07	1.91e-08	-8.3873	9.1192	-1.06088	hsa-miR-671-5p
hsa-miR-31*	6.53e-07	2.18e-08	8.32414	8.9842	2.9675	hsa-miR-31*
hsa-miR-488	8.96e-07	3.08e-08	-8.16004	8.631	-1.18517	hsa-miR-488
hsa-miR-195	1.12e-06	3.97e-08	-8.03995	8.3703	-2.75168	hsa-miR-195
hsa-miR-222	1.32e-06	4.79e-08	7.9523	8.1788	1.95202	hsa-miR-222
hsa-miR-126	1.76e-06	6.61e-08	-7.8036	7.8516	-2.95672	hsa-miR-126
hsa-miR-219-5p	2.06e-06	7.95e-08	-7.71878	7.6636	-3.29168	hsa-miR-219-5p
hsa-miR-9*	2.43e-06	9.62e-08	-7.63148	7.4692	-5.13027	hsa-miR-9*
hur_4	2.8e-06	1.14e-07	7.55554	7.2993	1.94021		control
hsa-miR-181a	2.99e-06	1.24e-07	-7.51445	7.207	-2.15835	hsa-miR-181a
hsa-miR-338-3p	3.25e-06	1.38e-07	-7.46594	7.0978	-4.65638	hsa-miR-338-3p
hsa-miR-31	4.37e-06	1.91e-07	7.32117	6.7701	3.10849	hsa-miR-31
ebv-miR-BART13	4.38e-06	1.96e-07	7.3097	6.744	1.3158	ebv-miR-BART13	NA
hsa-miR-150	5.86e-06	2.68e-07	-7.1699	6.4248	-0.79532	hsa-miR-150
hsa-miR-153	6.15e-06	2.88e-07	-7.13857	6.3529	-1.13022	hsa-miR-153
hsa-miR-342-5p	6.36e-06	3.04e-07	-7.11376	6.2959	-0.319134	hsa-miR-342-5p
hur_1	6.62e-06	3.24e-07	7.0863	6.2327	2.27464		control
hsa-miR-720	6.99e-06	3.49e-07	7.05319	6.1564	1.73474	hsa-miR-720
hsa-miR-139-3p	8.46e-06	4.31e-07	-6.96039	5.9418	-0.31864	hsa-miR-139-3p
hsa-miR-140-5p	9.52e-06	4.95e-07	-6.90001	5.8016	-1.56907	hsa-miR-140-5p
hsa-miR-29c*	1.14e-05	6.04e-07	-6.8132	5.5993	-0.910136	hsa-miR-29c*
hsa-miR-518c	1.53e-05	8.28e-07	6.67639	5.2786	0.102442	hsa-miR-518c
hsa-miR-1278	1.53e-05	8.45e-07	6.66771	5.2581	0.131897	hsa-miR-1278
hsa-miR-191*	1.61e-05	9.16e-07	6.63282	5.176	0.559599	hsa-miR-191*
hsa-miR-1207-5p	1.61e-05	9.2e-07	-6.63098	5.1717	-1.87828	hsa-miR-1207-5p
hsa-miR-9	1.66e-05	9.69e-07	-6.60865	5.119	-4.39267	hsa-miR-9
hsa-miR-665	1.7e-05	1.01e-06	-6.5912	5.0778	-0.256006	hsa-miR-665
NC1_00000215	1.88e-05	1.13e-06	6.54172	4.9608	0.169266		control
hsv1-miR-H1	2.24e-05	1.37e-06	-6.45955	4.7659	-0.834191	hsv1-miR-H1
hsa-miR-367*	2.3e-05	1.44e-06	6.43954	4.7183	0.096617	hsa-miR-367*
hsa-miR-483-5p	2.39e-05	1.52e-06	-6.41704	4.6647	-1.28437	hsa-miR-483-5p
hsa-miR-126*	2.9e-05	1.87e-06	-6.32843	4.4533	-0.656318	hsa-miR-126*
hsa-miR-135a	3.05e-05	2e-06	-6.29977	4.3847	-1.4143	hsa-miR-135a
hsa-miR-221	3.09e-05	2.06e-06	6.28741	4.3551	2.55071	hsa-miR-221
hsa-miR-200b*	3.76e-05	2.54e-06	-6.198	4.1406	-0.090695	hsa-miR-200b*
hsa-miR-1274b	3.94e-05	2.71e-06	6.17165	4.0772	2.35392	hsa-miR-1274b
hsa-miR-212	4.41e-05	3.07e-06	6.11848	3.9491	0.988329	hsa-miR-212
hsa-miR-548e	4.51e-05	3.25e-06	6.09458	3.8914	0.085418	hsa-miR-548e
hsa-miR-1225-5p	4.51e-05	3.27e-06	-6.09254	3.8865	-1.69444	hsa-miR-1225-5p
hsa-miR-149*	4.51e-05	3.28e-06	-6.0905	3.8815	-0.201414	hsa-miR-149*
hsa-miR-526b	5.28e-05	3.9e-06	-6.01857	3.7076	-0.149205	hsa-miR-526b
hsa-miR-454	6.75e-05	5.05e-06	-5.91046	3.4453	-0.905131	hsa-miR-454
hsa-miR-198	7.31e-05	5.55e-06	-5.87158	3.3507	-0.228616	hsa-miR-198
hsa-miR-1300_v13.0	7.71e-05	5.93e-06	-5.84378	3.2829	-0.626763		hsa-miR-1300_v13.0
hsa-miR-95	7.77e-05	6.06e-06	-5.83475	3.2609	-1.06053	hsa-miR-95
hsa-miR-187*	0.000104	8.21e-06	-5.70936	2.9546	-0.204421	hsa-miR-187*
ebv-miR-BART18-5p	0.000114	9.1e-06	5.66707	2.851	0.11824	ebv-miR-BART18-5p	NA
hsa-miR-1288	0.00013	1.06e-05	5.60519	2.6991	0.976327	hsa-miR-1288
hsa-miR-1228	0.00014	1.15e-05	5.57089	2.6149	0.773392	hsa-miR-1228
hsa-miR-625*	0.000142	1.18e-05	5.56094	2.5904	0.15634	hsa-miR-625*
hsa-miR-939	0.000142	1.2e-05	5.55395	2.5732	1.0059	hsa-miR-939
hsa-miR-507	0.000155	1.32e-05	5.51377	2.4744	0.090546	hsa-miR-507
hsa-miR-129-5p	0.00016	1.38e-05	-5.49511	2.4284	-0.86384	hsa-miR-129-5p
hsa-miR-181c*	0.000172	1.51e-05	-5.45989	2.3416	-0.362221	hsa-miR-181c*
hsa-miR-1289	0.000176	1.56e-05	5.44616	2.3077	0.076184	hsa-miR-1289
hsa-miR-664*	0.000181	1.62e-05	-5.43152	2.2716	-0.400121	hsa-miR-664*
hsa-miR-548o	0.000181	1.64e-05	5.42664	2.2596	0.107889	hsa-miR-548o
hsa-miR-1324	0.000194	1.78e-05	5.39133	2.1724	0.087569	hsa-miR-1324
hsa-miR-99a	0.000194	1.79e-05	-5.38892	2.1665	-1.53996	hsa-miR-99a
hsa-miR-934	0.0002	1.88e-05	-5.3708	2.1217	-0.094907	hsa-miR-934
hsa-miR-320b	0.000212	2e-05	5.34363	2.0546	0.963076	hsa-miR-320b
jcv-miR-J1-5p	0.000227	2.18e-05	-5.31026	1.972	-0.144095	jcv-miR-J1-5p
hsa-miR-1471	0.000266	2.58e-05	-5.2418	1.8026	-0.571984	hsa-miR-1471
hsa-miR-101	0.000274	2.68e-05	-5.22609	1.7636	-1.85494	hsa-miR-101	NA
hsa-miR-663	0.000281	2.8e-05	-5.20832	1.7196	-1.15474	hsa-miR-663
hsa-miR-224	0.000281	2.8e-05	5.20739	1.7173	1.39264	hsa-miR-224
dmr_316	0.000287	2.89e-05	5.19436	1.685	0.147297		control
hsa-miR-603	0.000303	3.09e-05	5.16758	1.6186	0.082063	hsa-miR-603
hsa-miR-19a*	0.000312	3.21e-05	5.15208	1.5801	0.087919	hsa-miR-19a*
hsa-miR-610	0.000321	3.34e-05	-5.13608	1.5404	-0.154792	hsa-miR-610
hsa-miR-16-2*	0.000321	3.37e-05	5.13226	1.531	0.220418	hsa-miR-16-2*
hsa-miR-499-5p	0.000349	3.71e-05	-5.09391	1.4358	-0.202948	hsa-miR-499-5p
hsa-miR-623	0.000356	3.82e-05	-5.08203	1.4063	-0.217017	hsa-miR-623
bkv-miR-B1-3p	0.00037	4e-05	5.06295	1.3589	0.074478	bkv-miR-B1-3p	NA
hsa-miR-25	0.000377	4.12e-05	5.05153	1.3305	1.35415	hsa-miR-25
hsa-miR-1179	0.000389	4.3e-05	5.03462	1.2885	0.089031	hsa-miR-1179	NA
hsa-miR-302f	0.000406	4.52e-05	5.0139	1.237	0.085975	hsa-miR-302f
hsa-miR-130a*	0.000467	5.25e-05	4.95337	1.0865	0.110274	hsa-miR-130a*
ebv-miR-BART15	0.000474	5.37e-05	4.94436	1.0641	0.118302	ebv-miR-BART15	NA
hsa-miR-760	0.000475	5.46e-05	-4.93797	1.0482	-0.150513	hsa-miR-760
hsa-miR-425*	0.000475	5.51e-05	4.93445	1.0395	0.410102	hsa-miR-425*
hsa-miR-422a	0.000475	5.54e-05	-4.9319	1.0332	-0.145508	hsa-miR-422a
hsa-miR-1238	0.000486	5.72e-05	4.91904	1.0012	0.670568	hsa-miR-1238
hsa-miR-1299	0.000486	5.76e-05	-4.91601	0.9936	-0.176737	hsa-miR-1299
hsa-miR-589*	0.000498	5.95e-05	4.90289	0.961	0.068436	hsa-miR-589*
hsa-miR-556-3p	0.000503	6.08e-05	4.89471	0.9407	0.151546	hsa-miR-556-3p
hsv1-miR-H6	0.000527	6.43e-05	4.87206	0.8843	0.59443	hsv1-miR-H6
hsa-miR-1321	0.000527	6.48e-05	-4.86904	0.8768	-0.201084	hsa-miR-1321
hsa-miR-330-3p	0.000529	6.56e-05	-4.86407	0.8644	-0.680889	hsa-miR-330-3p
hsa-miR-486-5p	0.000555	6.92e-05	-4.84211	0.8098	-1.2098	hsa-miR-486-5p
hsa-miR-146a*	0.000562	7.08e-05	4.83303	0.7872	0.103703	hsa-miR-146a*
hsa-let-7f-1*	0.000615	7.81e-05	4.79361	0.6891	0.472434	hsa-let-7f-1*	NA
hsa-miR-1224-5p	0.000625	7.99e-05	-4.78433	0.666	-0.740309	hsa-miR-1224-5p
hsa-miR-653	0.000642	8.32e-05	4.76838	0.6263	0.100864	hsa-miR-653
hsa-miR-892b	0.000642	8.34e-05	4.76707	0.6231	0.845696	hsa-miR-892b
hsa-miR-139-5p	0.000674	8.85e-05	-4.74349	0.5644	-1.01763	hsa-miR-139-5p
hsa-miR-335	0.000674	8.91e-05	-4.74076	0.5576	-1.4568	hsa-miR-335
hsa-miR-648	0.00079	0.000105	-4.67374	0.3909	-0.106562	hsa-miR-648
hsa-miR-942	0.000814	0.00011	4.65684	0.3488	0.113864	hsa-miR-942
hsa-miR-1308	0.000814	0.00011	4.65512	0.3445	0.934926	hsa-miR-1308
hsa-miR-202*	0.000814	0.000111	4.65247	0.3379	0.130025	hsa-miR-202*
hsa-miR-924	0.000828	0.000114	4.64262	0.3135	0.106584	hsa-miR-924
hsa-miR-182*	0.000875	0.000121	4.61735	0.2506	0.105565	hsa-miR-182*
hsa-miR-544	0.000889	0.000124	4.60661	0.2239	0.082244	hsa-miR-544
hsa-miR-877	0.000889	0.000126	-4.60237	0.2133	-0.226328	hsa-miR-877
hsa-miR-1234	0.000889	0.000126	4.60141	0.2109	0.843981	hsa-miR-1234
hsa-miR-548b-3p	0.000889	0.000127	4.59936	0.2059	0.148944	hsa-miR-548b-3p
hsa-miR-923_v12.0	0.000976	0.00014	-4.55902	0.1056	-2.35501		hsa-miR-923_v12.0
hsa-miR-24-1*	0.00113	0.000163	-4.4974	-0.0476	-0.340754	hsa-miR-24-1*
hsa-miR-222*	0.00114	0.000166	4.48995	-0.0661	0.131121	hsa-miR-222*
hsa-miR-766	0.00116	0.00017	4.48203	-0.0857	0.539464	hsa-miR-766
hsa-miR-622	0.00116	0.000171	-4.47895	-0.0934	-0.361453	hsa-miR-622
hsa-miR-148b*	0.00117	0.000174	4.4721	-0.1104	0.076762	hsa-miR-148b*
hsa-miR-26a	0.00117	0.000176	-4.46747	-0.1219	-0.913847	hsa-miR-26a
hsa-miR-488*	0.00119	0.00018	-4.45947	-0.1418	-0.199528	hsa-miR-488*
hsa-miR-193b	0.00122	0.000185	4.44714	-0.1724	1.43827	hsa-miR-193b
hsa-miR-26a-1*	0.00125	0.000191	4.43431	-0.2042	0.102924	hsa-miR-26a-1*
hsa-miR-365	0.00134	0.000206	4.40352	-0.2806	1.08572	hsa-miR-365
hsa-miR-125a-5p	0.00136	0.000211	4.39382	-0.3047	0.732136	hsa-miR-125a-5p
hsa-miR-155*	0.00136	0.000213	4.39141	-0.3106	0.114921	hsa-miR-155*
hsa-miR-26a-2*	0.00136	0.000214	4.38896	-0.3167	0.106474	hsa-miR-26a-2*
hsa-miR-98	0.00138	0.000219	-4.37976	-0.3395	-0.954165	hsa-miR-98
hsa-miR-101*	0.0014	0.000223	-4.37324	-0.3557	-0.109995	hsa-miR-101*	NA
hsa-miR-520c-3p	0.0014	0.000224	4.36999	-0.3637	0.10138	hsa-miR-520c-3p
hsa-miR-599	0.00144	0.000232	4.35619	-0.3979	0.062309	hsa-miR-599
hsa-miR-1226*	0.00149	0.000242	-4.3392	-0.44	-0.221731	hsa-miR-1226*
hsa-miR-548a-3p	0.00149	0.000243	4.3387	-0.4413	0.076232	hsa-miR-548a-3p
hsa-miR-1282	0.0015	0.000246	4.33258	-0.4564	0.134784	hsa-miR-1282
hsa-miR-219-2-3p	0.00157	0.000261	-4.31011	-0.5121	-1.14601	hsa-miR-219-2-3p
hsa-miR-26b	0.00158	0.000263	-4.30569	-0.523	-1.37807	hsa-miR-26b
hsa-miR-526b*	0.00162	0.000272	4.29279	-0.5549	0.121319	hsa-miR-526b*
hsa-miR-503	0.00168	0.000283	4.27678	-0.5945	0.878754	hsa-miR-503
hsa-miR-1537	0.00168	0.000286	4.2732	-0.6034	0.055329	hsa-miR-1537
hsa-miR-19b-2*	0.00168	0.000287	4.27182	-0.6068	0.132402	hsa-miR-19b-2*
hsa-miR-520d-3p	0.00169	0.00029	4.26643	-0.6202	0.172177	hsa-miR-520d-3p
hsa-miR-433	0.0017	0.000294	-4.26175	-0.6317	-0.172644	hsa-miR-433
hsa-miR-1201	0.00173	0.000301	4.25253	-0.6545	0.076514	hsa-miR-1201
hsa-miR-93	0.00178	0.000311	4.23933	-0.6871	1.42976	hsa-miR-93
hsa-miR-572	0.00179	0.000315	-4.23388	-0.7006	-0.594501	hsa-miR-572
hsa-miR-601	0.00184	0.000327	-4.21856	-0.7384	-0.261362	hsa-miR-601
hsa-miR-607	0.00184	0.000328	4.21822	-0.7393	0.060126	hsa-miR-607
hsa-miR-631	0.00191	0.000342	-4.20133	-0.781	-0.167329	hsa-miR-631
hsa-miR-1469	0.00196	0.000352	-4.18898	-0.8115	-0.247807	hsa-miR-1469
hsa-miR-522	0.00206	0.000375	4.16346	-0.8744	0.092679	hsa-miR-522
hsa-let-7f	0.00206	0.000378	-4.16101	-0.8804	-1.14902	hsa-let-7f	NA
bkv-miR-B1-5p	0.00206	0.000379	-4.1599	-0.8832	-0.100198	bkv-miR-B1-5p	NA
hsa-miR-188-5p	0.00206	0.00038	-4.15831	-0.8871	-0.892611	hsa-miR-188-5p
hsa-miR-628-5p	0.00209	0.000389	-4.14968	-0.9084	-0.277566	hsa-miR-628-5p
hsa-miR-190	0.00209	0.000389	-4.149	-0.91	-0.257376	hsa-miR-190
hsa-miR-373*	0.00231	0.000433	-4.10575	-1.0165	-0.120669	hsa-miR-373*
hsa-miR-296-5p	0.00231	0.000434	4.10498	-1.0184	0.469159	hsa-miR-296-5p
hsa-miR-129-3p	0.00236	0.000448	-4.09265	-1.0488	-1.23509	hsa-miR-129-3p
hsa-miR-1281	0.00237	0.000451	4.08963	-1.0562	0.545471	hsa-miR-1281
hsa-miR-26b*	0.0024	0.000461	4.08071	-1.0781	0.123795	hsa-miR-26b*
hsa-miR-125b	0.0024	0.000463	-4.07952	-1.0811	-2.07318	hsa-miR-125b
hsa-miR-1911*	0.00244	0.000472	4.07103	-1.1019	0.06261	hsa-miR-1911*
hsa-miR-1264	0.00245	0.000476	4.06778	-1.1099	0.118126	hsa-miR-1264
hsa-miR-136*	0.00253	0.000494	-4.05305	-1.1461	-0.479247	hsa-miR-136*
hsa-miR-548g	0.00255	0.000502	4.04657	-1.162	0.091275	hsa-miR-548g
hsa-miR-184	0.00297	0.000591	-3.98082	-1.3232	-0.13687	hsa-miR-184
hsa-miR-132*	0.00297	0.000591	-3.9807	-1.3235	-0.477474	hsa-miR-132*
NC2_00106057	0.00298	0.000597	3.97655	-1.3336	0.285201		control
hsa-let-7c	0.00298	0.000602	-3.97314	-1.342	-1.61738	hsa-let-7c	NA
hsa-miR-633	0.00298	0.000603	3.97282	-1.3428	0.074662	hsa-miR-633
hsa-miR-454*	0.00298	0.000605	3.97156	-1.3458	0.209098	hsa-miR-454*
hsa-miR-655	0.00303	0.000619	3.96249	-1.368	0.078049	hsa-miR-655
hsa-miR-361-3p	0.00313	0.000642	-3.94732	-1.4051	-0.403182	hsa-miR-361-3p
hsa-miR-646	0.00327	0.000677	3.92616	-1.4568	0.06998	hsa-miR-646
hsa-miR-548k	0.00327	0.000677	3.92611	-1.4569	0.098176	hsa-miR-548k
hsa-miR-519b-3p	0.00332	0.000692	3.91714	-1.4788	0.098269	hsa-miR-519b-3p
hsa-miR-490-5p	0.00332	0.000694	-3.91616	-1.4812	-0.106382	hsa-miR-490-5p
hsa-miR-1279	0.00332	0.000697	3.91404	-1.4864	0.080836	hsa-miR-1279
hsa-miR-15a	0.00348	0.000734	-3.89333	-1.5369	-0.857811	hsa-miR-15a
hsa-miR-1285	0.00352	0.000748	-3.88569	-1.5555	-0.128424	hsa-miR-1285
hsa-miR-566	0.00357	0.000762	-3.87845	-1.5731	-0.107358	hsa-miR-566
ebv-miR-BART8	0.00357	0.000765	3.87651	-1.5779	0.105782	ebv-miR-BART8	NA
hsa-miR-612	0.00357	0.000769	3.87471	-1.5823	0.061477	hsa-miR-612
hsa-miR-520f	0.00365	0.000791	3.86327	-1.6101	0.114179	hsa-miR-520f
hsa-miR-651	0.00374	0.000813	3.85197	-1.6376	0.067427	hsa-miR-651
hsa-miR-609	0.00374	0.000817	3.85009	-1.6422	0.078974	hsa-miR-609
hsa-miR-345	0.00374	0.000821	-3.84822	-1.6467	-0.201532	hsa-miR-345
hsa-miR-1825	0.00374	0.000825	3.84634	-1.6513	0.347193	hsa-miR-1825
hsa-miR-600	0.00375	0.000832	3.84272	-1.6601	0.087102	hsa-miR-600
kshv-miR-K12-4-5p	0.00393	0.000875	3.82228	-1.7097	0.09001	kshv-miR-K12-4-5p
hsa-miR-887	0.00395	0.000885	-3.81761	-1.7211	-0.205023	hsa-miR-887
hsa-miR-562	0.00395	0.000888	3.81636	-1.7241	0.069215	hsa-miR-562
hsa-miR-885-5p	0.00395	0.000892	-3.81441	-1.7289	-0.67332	hsa-miR-885-5p
hsa-miR-769-3p	0.00395	0.000897	-3.81212	-1.7344	-0.093132	hsa-miR-769-3p
hsa-miR-1273	0.00395	0.000899	3.81139	-1.7362	0.055161	hsa-miR-1273
hsa-miR-431*	0.00411	0.00094	3.79342	-1.7798	0.560368	hsa-miR-431*
hsa-miR-208b	0.00412	0.000948	-3.78981	-1.7885	-0.122706	hsa-miR-208b
hsa-miR-499-3p	0.00413	0.000954	3.78721	-1.7948	0.051652	hsa-miR-499-3p
hsa-let-7a	0.00415	0.000964	-3.78333	-1.8042	-1.18094	hsa-let-7a	NA
hsa-miR-518f*	0.00421	0.000984	3.77484	-1.8248	0.086699	hsa-miR-518f*
ebv-miR-BART14*	0.00421	0.000985	3.77443	-1.8258	0.049821	ebv-miR-BART14*	NA
hsa-miR-634	0.00423	0.000994	3.77062	-1.835	0.322706	hsa-miR-634
hsa-miR-515-5p	0.00426	0.00101	3.76579	-1.8467	0.091616	hsa-miR-515-5p
hsa-miR-586	0.00436	0.00104	3.75312	-1.8773	0.092757	hsa-miR-586
hsa-miR-576-5p	0.00436	0.00104	3.75238	-1.8791	0.157024	hsa-miR-576-5p
hsa-miR-21*	0.00442	0.00106	3.74394	-1.8995	1.90758	hsa-miR-21*
hsa-miR-1256	0.00442	0.00106	3.74358	-1.9004	0.05767	hsa-miR-1256
hsa-miR-181b	0.00447	0.00108	-3.73775	-1.9145	-0.816113	hsa-miR-181b
hsa-miR-875-5p	0.00447	0.00108	3.73572	-1.9194	0.105749	hsa-miR-875-5p
hsa-miR-496	0.00448	0.00109	3.73318	-1.9255	0.059309	hsa-miR-496
hsa-miR-548j	0.00454	0.00111	3.72615	-1.9425	0.073712	hsa-miR-548j
hsa-miR-933	0.00455	0.00112	3.72331	-1.9494	0.118763	hsa-miR-933
hsa-miR-1249	0.00462	0.00114	3.71501	-1.9694	0.506369	hsa-miR-1249
ebv-miR-BART3	0.00473	0.00117	3.70371	-1.9966	0.069465	ebv-miR-BART3	NA
hsa-miR-874	0.00497	0.00124	-3.68183	-2.0493	-0.450894	hsa-miR-874
hsa-miR-15b*	0.00497	0.00124	3.6804	-2.0528	0.138076	hsa-miR-15b*
hsa-miR-613	0.00502	0.00126	3.67447	-2.067	0.130834	hsa-miR-613
hsa-miR-767-3p	0.00502	0.00126	3.67302	-2.0705	0.177362	hsa-miR-767-3p
hsa-miR-220a	0.00514	0.0013	3.66154	-2.0981	0.097152	hsa-miR-220a
hsa-miR-618	0.00519	0.00132	3.65589	-2.1117	0.083971	hsa-miR-618
hsa-miR-128	0.00535	0.00136	-3.64239	-2.1441	-1.5461	hsa-miR-128
hsa-miR-33a*	0.00537	0.00137	3.63899	-2.1523	0.090438	hsa-miR-33a*
hsa-miR-125b-2*	0.00566	0.00145	-3.61592	-2.2076	-0.634933	hsa-miR-125b-2*
hsa-miR-512-5p	0.00578	0.00149	3.60555	-2.2324	0.072301	hsa-miR-512-5p
hsa-miR-298	0.00582	0.00151	-3.60024	-2.2451	-0.084039	hsa-miR-298
ebv-miR-BART7*	0.00582	0.00152	3.59867	-2.2489	0.057822	ebv-miR-BART7*	NA
hsa-let-7b*	0.00582	0.00152	3.59757	-2.2515	0.50559	hsa-let-7b*	NA
hsa-miR-518a-3p	0.00582	0.00153	3.59627	-2.2546	0.153789	hsa-miR-518a-3p
hsa-miR-200a	0.00585	0.00154	-3.5926	-2.2634	-0.132608	hsa-miR-200a
hsa-miR-591	0.00585	0.00155	3.59064	-2.2681	0.052094	hsa-miR-591
hsa-miR-140-3p	0.00591	0.00157	-3.58438	-2.283	-0.834166	hsa-miR-140-3p
hsa-miR-519d	0.00591	0.00158	3.58331	-2.2856	0.123862	hsa-miR-519d
hsa-miR-498	0.00601	0.00161	-3.57541	-2.3045	-0.105503	hsa-miR-498
hsa-miR-593	0.00631	0.00169	3.55349	-2.3568	0.09214	hsa-miR-593
hsa-miR-196a	0.00632	0.0017	3.55122	-2.3622	1.67817	hsa-miR-196a
hsa-miR-489	0.00633	0.00171	-3.54917	-2.367	-0.110086	hsa-miR-489
hsa-miR-802	0.00651	0.00177	3.53585	-2.3988	0.054149	hsa-miR-802
hsa-miR-1914*	0.00659	0.0018	3.5295	-2.4139	0.932866	hsa-miR-1914*
hsa-miR-370	0.00669	0.00183	-3.52148	-2.433	-0.26537	hsa-miR-370
hsa-miR-642	0.00675	0.00185	3.51656	-2.4446	0.057696	hsa-miR-642
hsa-miR-597	0.00696	0.00192	3.50226	-2.4786	0.061557	hsa-miR-597
hsa-miR-1259	0.00701	0.00195	3.49622	-2.4929	0.083623	hsa-miR-1259
hsa-miR-708	0.00701	0.00195	-3.49546	-2.4947	-0.10486	hsa-miR-708
hsa-miR-619	0.00701	0.00196	3.49335	-2.4997	0.077552	hsa-miR-619
hsa-miR-204	0.00701	0.00196	-3.49332	-2.4998	-1.58619	hsa-miR-204
hsa-miR-340	0.00708	0.00199	-3.4878	-2.5129	-1.14056	hsa-miR-340
hsa-miR-453	0.00715	0.00202	3.48241	-2.5257	0.041207	hsa-miR-453
hsa-miR-1265	0.00716	0.00203	3.48036	-2.5305	0.084111	hsa-miR-1265
hsa-miR-15a*	0.00729	0.00207	3.47121	-2.5522	0.136265	hsa-miR-15a*
hcmv-miR-UL22A*	0.0073	0.00208	3.46889	-2.5577	0.047903	hcmv-miR-UL22A*	NA
hsa-miR-548d-3p	0.00738	0.00211	3.46325	-2.571	0.098819	hsa-miR-548d-3p
hsa-miR-302b*	0.0076	0.00218	3.44941	-2.6037	0.066464	hsa-miR-302b*
hsa-miR-515-3p	0.00763	0.0022	3.44655	-2.6105	0.114639	hsa-miR-515-3p
hsa-miR-340*	0.00772	0.00223	-3.44004	-2.6259	-0.565621	hsa-miR-340*
hsa-miR-1267	0.00804	0.00233	3.42193	-2.6686	0.148234	hsa-miR-1267
hsa-miR-29a*	0.00823	0.0024	3.41072	-2.695	0.123638	hsa-miR-29a*
hsa-miR-518b	0.00838	0.00245	3.40164	-2.7163	0.090162	hsa-miR-518b
hsa-miR-518d-3p	0.00841	0.00247	3.39893	-2.7227	0.15597	hsa-miR-518d-3p
hsa-miR-888*	0.00855	0.00252	3.39044	-2.7427	0.066607	hsa-miR-888*
hcmv-miR-UL22A	0.00859	0.00255	3.38588	-2.7534	0.074242	hcmv-miR-UL22A	NA
hsa-miR-593*	0.00859	0.00255	3.38572	-2.7538	0.057466	hsa-miR-593*
NC2_00092197	0.00865	0.00258	3.38064	-2.7657	0.198931		control
hsa-miR-374a	0.00865	0.00258	3.38006	-2.7671	0.764646	hsa-miR-374a
hsa-miR-624	0.0088	0.00264	3.37137	-2.7874	0.091	hsa-miR-624
hsa-miR-519c-3p	0.00881	0.00265	3.36937	-2.7921	0.084657	hsa-miR-519c-3p
hsa-let-7g	0.00882	0.00266	-3.36775	-2.7959	-0.836326	hsa-let-7g	NA
NC1_00000197	0.00882	0.00267	3.3665	-2.7988	0.306939		control
hsa-miR-17	0.00882	0.00268	3.36481	-2.8028	1.5594	hsa-miR-17
hsa-miR-770-5p	0.00883	0.00269	3.36285	-2.8074	0.233716	hsa-miR-770-5p
hur_2	0.00887	0.00271	3.35968	-2.8148	0.841232		control
hsa-miR-944	0.00903	0.00278	3.35016	-2.8371	0.093535	hsa-miR-944
hsa-miR-487a	0.00903	0.00278	-3.34917	-2.8394	-0.178729	hsa-miR-487a
hsa-miR-1257	0.00903	0.00279	3.34806	-2.842	0.055095	hsa-miR-1257
hiv1-miR-TAR-3p	0.00933	0.00289	3.33316	-2.8769	1.10946	hiv1-miR-TAR-3p	NA
hsa-miR-578	0.00952	0.00296	3.32328	-2.8999	0.057086	hsa-miR-578
hsa-miR-221*	0.00967	0.00302	3.31532	-2.9185	0.959683	hsa-miR-221*
hsa-miR-1208	0.00976	0.00306	-3.31045	-2.9298	-0.135764	hsa-miR-1208
hsa-miR-450b-3p	0.01	0.00315	3.29818	-2.9584	0.058425	hsa-miR-450b-3p
hsa-miR-518e	0.01	0.00316	3.2966	-2.9621	0.096751	hsa-miR-518e
hsa-miR-548c-3p	0.0103	0.00325	3.2847	-2.9897	0.077624	hsa-miR-548c-3p
hsa-miR-1539	0.0103	0.00327	3.28238	-2.9952	0.413042	hsa-miR-1539
hsa-miR-15b	0.0103	0.00328	3.28121	-2.9979	0.77852	hsa-miR-15b
hsa-miR-516a-3p	0.0104	0.00333	3.27431	-3.0139	0.041406	hsa-miR-516a-3p
hsa-miR-191	0.0107	0.00342	3.26341	-3.0392	0.073761	hsa-miR-191
hsa-miR-383	0.0107	0.00343	-3.26196	-3.0425	-0.350109	hsa-miR-383
hsa-miR-196b	0.0108	0.00347	3.25734	-3.0532	1.6334	hsa-miR-196b
hsa-miR-136	0.0109	0.00351	-3.25232	-3.0649	-1.25126	hsa-miR-136
hsa-miR-1207-3p	0.0109	0.00356	3.24692	-3.0774	0.085142	hsa-miR-1207-3p
hsa-miR-518f	0.0109	0.00356	3.24635	-3.0787	0.053882	hsa-miR-518f
hsa-miR-1263	0.011	0.00359	3.2431	-3.0862	0.057001	hsa-miR-1263
hsa-miR-548a-5p	0.011	0.00362	3.23998	-3.0934	0.092408	hsa-miR-548a-5p
hsa-miR-1225-3p	0.0112	0.00368	3.23328	-3.1089	0.454353	hsa-miR-1225-3p
dmr_308	0.0112	0.00368	3.23304	-3.1095	0.051636		control
hsa-miR-1228*	0.0114	0.00376	-3.22381	-3.1308	-0.084254	hsa-miR-1228*
hsa-miR-323-3p	0.0114	0.0038	-3.21981	-3.14	-0.408908	hsa-miR-323-3p
hsa-miR-616*	0.0114	0.0038	3.21929	-3.1412	0.062883	hsa-miR-616*
hsa-miR-551b	0.0121	0.00404	-3.19396	-3.1995	-1.42558	hsa-miR-551b
hsa-miR-551a	0.0122	0.0041	3.18796	-3.2133	0.115143	hsa-miR-551a
hiv1-miR-N367	0.0122	0.00411	3.18688	-3.2158	0.058322	hiv1-miR-N367	NA
hsa-miR-568	0.0123	0.00415	3.18254	-3.2258	0.078499	hsa-miR-568
hsa-miR-193a-3p	0.0124	0.00419	3.17898	-3.234	0.847013	hsa-miR-193a-3p
hsa-miR-200a*	0.0125	0.00424	-3.17346	-3.2466	-0.080824	hsa-miR-200a*
hsa-miR-519e	0.0125	0.00427	3.17099	-3.2523	0.165777	hsa-miR-519e
ebv-miR-BART7	0.0125	0.00428	-3.16967	-3.2553	-0.129565	ebv-miR-BART7	NA
NC2_00122731	0.0127	0.00435	3.1627	-3.2713	0.28879		control
hsa-miR-513a-3p	0.0129	0.00444	3.15424	-3.2907	0.098794	hsa-miR-513a-3p
hsa-let-7a*	0.013	0.00449	3.14993	-3.3005	0.077148	hsa-let-7a*	NA
hsa-miR-363	0.013	0.0045	-3.14921	-3.3022	-1.7229	hsa-miR-363
hsa-miR-491-3p	0.0132	0.00457	3.14209	-3.3184	0.090873	hsa-miR-491-3p
ebv-miR-BART20-5p	0.0133	0.00461	3.13831	-3.3271	0.084499	ebv-miR-BART20-5p	NA
hsa-miR-432*	0.0133	0.00465	3.13507	-3.3345	0.0748	hsa-miR-432*
hsa-miR-302e	0.0133	0.00465	3.13485	-3.335	0.049671	hsa-miR-302e
kshv-miR-K12-8	0.0135	0.00474	-3.1269	-3.3531	-0.067473	kshv-miR-K12-8
hsa-miR-598	0.0138	0.00484	-3.11783	-3.3738	-0.523298	hsa-miR-598
hsa-miR-589	0.0138	0.00488	3.11484	-3.3806	0.068831	hsa-miR-589
hsa-miR-135a*	0.014	0.00495	-3.10837	-3.3953	-0.645763	hsa-miR-135a*
kshv-miR-K12-7	0.014	0.00497	-3.10709	-3.3983	-0.114373	kshv-miR-K12-7
hsa-miR-484	0.014	0.00499	3.10529	-3.4023	0.342691	hsa-miR-484
hsa-miR-1	0.014	0.00501	-3.10362	-3.4061	-0.497269	hsa-miR-1	NA
hsa-miR-516b	0.0143	0.00513	-3.09381	-3.4284	-0.081551	hsa-miR-516b
hcmv-miR-US25-1	0.0147	0.00527	-3.08256	-3.454	-0.054498	hcmv-miR-US25-1	NA
hsa-miR-525-3p	0.0149	0.00535	3.07553	-3.4699	0.067369	hsa-miR-525-3p
hsa-miR-448	0.0151	0.00546	3.06756	-3.4879	0.054017	hsa-miR-448
NegativeControl	0.0152	0.00549	3.065	-3.4937	0.229658		control
ebv-miR-BART11-5p	0.0157	0.0057	3.04888	-3.5302	0.062922	ebv-miR-BART11-5p	NA
hsa-miR-1185	0.0157	0.00572	-3.04746	-3.5334	-0.211905	hsa-miR-1185
hsa-miR-571	0.0162	0.0059	3.03402	-3.5637	0.355652	hsa-miR-571
hsa-miR-595	0.0163	0.006	3.02727	-3.5789	0.112438	hsa-miR-595
hsa-miR-628-3p	0.0163	0.006	-3.02705	-3.5794	-0.074867	hsa-miR-628-3p
hsa-miR-1226	0.017	0.00626	3.0093	-3.6192	0.099184	hsa-miR-1226
hsa-miR-548d-5p	0.0171	0.00633	3.00424	-3.6306	0.164303	hsa-miR-548d-5p
hsa-miR-520a-3p	0.0172	0.00636	3.00228	-3.635	0.173285	hsa-miR-520a-3p
hsa-miR-637	0.0172	0.00639	3.00047	-3.6391	0.061888	hsa-miR-637
hsa-miR-516a-5p	0.0172	0.00643	-2.99763	-3.6454	-0.132961	hsa-miR-516a-5p
ebv-miR-BART6-5p	0.0172	0.00643	2.99742	-3.6459	0.041961	ebv-miR-BART6-5p	NA
hsa-miR-592	0.0173	0.0065	-2.99324	-3.6553	-0.381225	hsa-miR-592
hsa-miR-1178	0.0174	0.00652	2.99194	-3.6582	0.102721	hsa-miR-1178	NA
hsa-miR-10a	0.0176	0.00662	2.98539	-3.6728	1.8325	hsa-miR-10a	NA
hsa-miR-638	0.0177	0.00669	-2.98084	-3.683	-0.745615	hsa-miR-638
hsa-miR-524-3p	0.018	0.0068	2.97364	-3.6991	0.079554	hsa-miR-524-3p
hsa-miR-200b	0.0182	0.00691	-2.96677	-3.7144	-0.168365	hsa-miR-200b
hsa-miR-548c-5p	0.0183	0.00698	2.96274	-3.7234	0.128379	hsa-miR-548c-5p
hsa-miR-29b-1*	0.0183	0.00698	2.96268	-3.7235	0.694519	hsa-miR-29b-1*
hsa-miR-561	0.0185	0.00709	2.95623	-3.7379	0.062608	hsa-miR-561
DarkCorner	0.0188	0.00723	2.94736	-3.7576	0.41315		control
hsa-let-7f-2*	0.0188	0.00725	2.94618	-3.7603	0.096811	hsa-let-7f-2*	NA
hsa-miR-559	0.0191	0.00739	2.93833	-3.7777	0.061229	hsa-miR-559
hsv1-miR-H4-3p	0.0191	0.00741	2.93734	-3.7799	0.060417	hsv1-miR-H4-3p
hsa-miR-190b	0.0198	0.00769	2.92118	-3.8157	0.080254	hsa-miR-190b
hsa-miR-510	0.0199	0.00775	-2.9178	-3.8232	-0.051659	hsa-miR-510
NC2_00079215	0.0199	0.00776	2.91753	-3.8238	0.183296		control
hsa-miR-96*	0.0201	0.00788	2.91094	-3.8384	0.045946	hsa-miR-96*
hsa-miR-520g	0.0203	0.00797	2.90572	-3.85	0.108787	hsa-miR-520g
hsa-miR-485-5p	0.0212	0.00835	-2.88549	-3.8946	-0.101957	hsa-miR-485-5p
hsa-miR-558	0.0212	0.00836	2.88542	-3.8947	0.053134	hsa-miR-558
hsa-miR-146b-3p	0.0212	0.00839	2.88378	-3.8983	0.050509	hsa-miR-146b-3p
hsa-miR-615-3p	0.0216	0.00858	2.87407	-3.9197	0.143275	hsa-miR-615-3p
hcmv-miR-UL36*	0.0219	0.00872	2.86705	-3.9351	0.059425	hcmv-miR-UL36*	NA
ebv-miR-BART10*	0.022	0.00875	2.86559	-3.9383	0.203237	ebv-miR-BART10*	NA
hsa-miR-1277	0.0221	0.00884	2.86097	-3.9485	0.082056	hsa-miR-1277
hsa-miR-21	0.0228	0.00914	-2.84662	-3.9799	-1.56709	hsa-miR-21
hsa-miR-500	0.0229	0.00918	2.84459	-3.9844	0.118473	hsa-miR-500
hsa-miR-134	0.023	0.00927	-2.84042	-3.9935	-0.505175	hsa-miR-134
hsa-miR-886-3p	0.023	0.00929	2.83955	-3.9954	2.42157	hsa-miR-886-3p
hsa-miR-1184	0.0231	0.00936	2.83616	-4.0028	0.058798	hsa-miR-1184
hsa-miR-151-3p	0.0232	0.00941	2.83399	-4.0075	0.515973	hsa-miR-151-3p
hsa-miR-424	0.0234	0.00951	2.82966	-4.017	1.04595	hsa-miR-424
hsa-miR-579	0.0234	0.00956	2.82701	-4.0228	0.060426	hsa-miR-579
ebv-miR-BART1-3p	0.0236	0.00963	2.82385	-4.0297	0.107194	ebv-miR-BART1-3p	NA
hsa-miR-553	0.0241	0.00988	2.81268	-4.054	0.078292	hsa-miR-553
hsa-miR-320c	0.025	0.0103	-2.79658	-4.089	-0.412189	hsa-miR-320c
hsa-miR-490-3p	0.025	0.0103	-2.79375	-4.0951	-0.113201	hsa-miR-490-3p
hsa-miR-1246	0.025	0.0104	2.79216	-4.0986	1.25565	hsa-miR-1246
hsa-miR-18a*	0.025	0.0104	2.79176	-4.0994	0.099523	hsa-miR-18a*
hsa-miR-330-5p	0.0258	0.0107	2.77788	-4.1295	0.050417	hsa-miR-330-5p
hsa-miR-892a	0.0258	0.0108	2.77611	-4.1333	0.075062	hsa-miR-892a
hsa-miR-1269	0.0258	0.0108	2.77483	-4.1361	0.054413	hsa-miR-1269
hsa-miR-34c-3p	0.0262	0.011	-2.76769	-4.1515	-0.074543	hsa-miR-34c-3p
hsa-miR-130b	0.0262	0.011	2.76721	-4.1525	1.17993	hsa-miR-130b
hsa-miR-1266	0.0264	0.0111	-2.76243	-4.1628	-0.043423	hsa-miR-1266
hsa-miR-1294	0.0269	0.0113	2.75301	-4.1831	0.052488	hsa-miR-1294
hsa-miR-606	0.0269	0.0114	2.75227	-4.1847	0.041855	hsa-miR-606
hsa-miR-1291	0.0269	0.0114	-2.75032	-4.1889	-0.058052	hsa-miR-1291
hsa-miR-509-5p	0.0274	0.0117	-2.74089	-4.2092	-0.052046	hsa-miR-509-5p
hsa-miR-7-2*	0.0283	0.012	2.72631	-4.2405	0.134317	hsa-miR-7-2*
hsa-miR-1245	0.0284	0.0121	2.72365	-4.2462	0.041674	hsa-miR-1245
hsa-miR-517b	0.0289	0.0123	2.71569	-4.2632	0.100582	hsa-miR-517b
hsa-miR-1255b	0.0289	0.0124	-2.71404	-4.2667	-0.081094	hsa-miR-1255b
hsa-miR-548p	0.0289	0.0124	2.71339	-4.2681	0.052413	hsa-miR-548p
hsa-miR-24	0.0304	0.0131	2.68919	-4.3197	0.745457	hsa-miR-24
hsa-miR-99a*	0.0304	0.0132	-2.68703	-4.3243	-0.060534	hsa-miR-99a*
hsa-let-7c*	0.0304	0.0132	2.68702	-4.3243	0.054809	hsa-let-7c*	NA
hsa-miR-1202	0.0306	0.0133	-2.68268	-4.3336	-0.881488	hsa-miR-1202
hsa-miR-92b*	0.0307	0.0134	-2.68031	-4.3386	-0.041228	hsa-miR-92b*
hsa-miR-888	0.0308	0.0134	-2.67836	-4.3427	-0.105157	hsa-miR-888
hsa-miR-564	0.031	0.0135	-2.67459	-4.3508	-0.131194	hsa-miR-564
hsa-miR-626	0.0336	0.0147	2.63829	-4.4275	0.0522	hsa-miR-626
hsa-miR-425	0.0337	0.0148	2.63512	-4.4342	0.633194	hsa-miR-425
hsa-miR-657	0.0338	0.0149	2.63298	-4.4387	0.086421	hsa-miR-657
hsa-miR-27a*	0.0338	0.0149	2.63155	-4.4417	0.065775	hsa-miR-27a*
hsa-miR-92b	0.0338	0.0149	-2.63109	-4.4426	-0.127271	hsa-miR-92b
hsa-miR-1538	0.034	0.0151	2.62686	-4.4515	0.052265	hsa-miR-1538
hsa-miR-376a*	0.0341	0.0152	-2.62481	-4.4558	-0.310594	hsa-miR-376a*
hsa-miR-585	0.0358	0.016	2.60184	-4.504	0.054527	hsa-miR-585
hcmv-miR-US33-3p	0.036	0.0161	2.59872	-4.5105	0.08071	hcmv-miR-US33-3p	NA
hsa-miR-1237	0.0361	0.0161	2.59648	-4.5152	0.367199	hsa-miR-1237
hcmv-miR-UL36	0.0362	0.0162	-2.59362	-4.5211	-0.044471	hcmv-miR-UL36	NA
hsa-miR-18b*	0.0369	0.0166	2.58452	-4.5401	0.112718	hsa-miR-18b*
hsa-miR-551b*	0.0378	0.0171	-2.57204	-4.5661	-0.066336	hsa-miR-551b*
kshv-miR-K12-6-5p	0.0388	0.0175	2.55942	-4.5922	0.057124	kshv-miR-K12-6-5p
ebv-miR-BART9	0.0404	0.0183	2.54064	-4.6311	0.045105	ebv-miR-BART9	NA
hsa-miR-1307	0.0404	0.0183	2.53961	-4.6332	0.114653	hsa-miR-1307
hsa-miR-1293	0.0405	0.0184	2.53781	-4.6369	0.049002	hsa-miR-1293
hsa-miR-16-1*	0.0409	0.0186	2.53236	-4.6481	0.041512	hsa-miR-16-1*
jcv-miR-J1-3p	0.0411	0.0188	2.52879	-4.6555	0.043204	jcv-miR-J1-3p
ebv-miR-BART18-3p	0.0412	0.0189	2.5267	-4.6598	0.04855	ebv-miR-BART18-3p	NA
hsa-miR-615-5p	0.0412	0.0189	2.52574	-4.6617	0.039207	hsa-miR-615-5p
hsa-miR-1204	0.0413	0.019	2.52378	-4.6658	0.062934	hsa-miR-1204
hsa-miR-563	0.0415	0.0191	2.52071	-4.6721	0.138413	hsa-miR-563
hsa-miR-186	0.0423	0.0195	-2.51095	-4.6921	-0.54199	hsa-miR-186
hsa-miR-342-3p	0.0423	0.0196	-2.51007	-4.6939	-0.570543	hsa-miR-342-3p
hsa-miR-517c	0.0423	0.0196	2.50817	-4.6978	0.056518	hsa-miR-517c
hsa-miR-193b*	0.0423	0.0197	-2.50763	-4.6989	-0.157725	hsa-miR-193b*
hsa-miR-202	0.0426	0.0199	-2.50326	-4.7078	-0.304633	hsa-miR-202
hsa-miR-18a	0.0427	0.02	2.50122	-4.712	1.35737	hsa-miR-18a
hsa-miR-644	0.0427	0.02	2.50003	-4.7145	0.044602	hsa-miR-644
hsa-miR-127-5p	0.0428	0.0201	-2.49769	-4.7192	-0.037329	hsa-miR-127-5p
hsa-miR-548b-5p	0.0428	0.0201	2.49721	-4.7202	0.151542	hsa-miR-548b-5p
hsa-miR-194*	0.0428	0.0202	2.49607	-4.7225	0.034275	hsa-miR-194*
hsa-miR-103-as	0.043	0.0204	2.49186	-4.7311	0.080377	hsa-miR-103-as	NA
hsa-miR-148a*	0.043	0.0204	2.49174	-4.7314	0.036741	hsa-miR-148a*
hsa-miR-93*	0.0433	0.0205	2.48816	-4.7387	0.05804	hsa-miR-93*
hsa-miR-487b	0.0433	0.0206	2.48712	-4.7408	0.669825	hsa-miR-487b
hsa-miR-508-3p	0.0462	0.022	2.45588	-4.8043	0.040492	hsa-miR-508-3p
kshv-miR-K12-12	0.0464	0.0222	2.45313	-4.8098	0.230825	kshv-miR-K12-12
hsa-miR-616	0.0465	0.0223	-2.45123	-4.8137	-0.057256	hsa-miR-616
hsa-miR-374a*	0.047	0.0226	2.44534	-4.8256	0.068203	hsa-miR-374a*
hsa-miR-511	0.0471	0.0226	2.44382	-4.8286	0.040109	hsa-miR-511
hsa-miR-7-1*	0.0472	0.0227	2.44147	-4.8334	0.202024	hsa-miR-7-1*
hsa-miR-211	0.0475	0.0229	2.43749	-4.8414	0.218762	hsa-miR-211
hsa-miR-548m	0.0482	0.0233	2.42975	-4.857	0.100825	hsa-miR-548m
hsa-miR-1206	0.0489	0.0237	2.42251	-4.8715	0.052821	hsa-miR-1206
hsa-miR-1236	0.0501	0.0244	2.40988	-4.8968	0.09874	hsa-miR-1236
hsa-miR-424*	0.0515	0.0251	-2.39674	-4.9231	-0.294798	hsa-miR-424*
hsa-let-7b	0.0519	0.0254	-2.39163	-4.9333	-1.4992	hsa-let-7b	NA
hsa-miR-663b	0.0524	0.0257	-2.38525	-4.946	-0.100709	hsa-miR-663b
hsa-miR-210	0.0524	0.0257	2.38486	-4.9467	0.695286	hsa-miR-210
hsa-miR-20a	0.0524	0.0257	2.38469	-4.9471	1.02665	hsa-miR-20a
hsa-miR-1470	0.0542	0.0267	2.36804	-4.9801	0.230039	hsa-miR-1470
hsa-miR-29c	0.0545	0.0269	-2.36433	-4.9875	-0.813875	hsa-miR-29c
hsa-miR-105*	0.0545	0.027	2.36333	-4.9894	0.053962	hsa-miR-105*	NA
hsa-miR-100*	0.0552	0.0273	2.35685	-5.0022	0.386717	hsa-miR-100*	NA
hsa-miR-92a	0.0554	0.0275	2.35398	-5.0079	0.924139	hsa-miR-92a
kshv-miR-K12-11	0.0558	0.0277	2.34996	-5.0158	0.045805	kshv-miR-K12-11
hsa-miR-106b*	0.058	0.0289	2.33074	-5.0536	0.05329	hsa-miR-106b*	NA
hsa-miR-339-5p	0.0582	0.0291	2.32824	-5.0585	0.035869	hsa-miR-339-5p
hsa-miR-492	0.0584	0.0292	2.32533	-5.0642	0.063308	hsa-miR-492
hsa-miR-1826	0.0585	0.0294	2.32362	-5.0676	0.287607	hsa-miR-1826
hsa-miR-1287	0.0588	0.0295	2.32058	-5.0735	0.202486	hsa-miR-1287
hsa-miR-1290	0.0592	0.0298	2.31592	-5.0826	1.10241	hsa-miR-1290
ebv-miR-BART19-5p	0.0612	0.0309	2.29903	-5.1155	0.03309	ebv-miR-BART19-5p	NA
hsa-miR-216b	0.0612	0.0309	-2.29881	-5.116	-0.134199	hsa-miR-216b
hcmv-miR-UL148D	0.0616	0.0312	2.29494	-5.1235	0.148052	hcmv-miR-UL148D	NA
hsa-miR-549	0.0627	0.0319	2.28521	-5.1424	0.040346	hsa-miR-549
hcmv-miR-US5-1	0.0632	0.0322	2.28064	-5.1512	0.037745	hcmv-miR-US5-1	NA
hsa-miR-493*	0.0641	0.0327	2.27283	-5.1663	0.480826	hsa-miR-493*
hsa-miR-1243	0.0655	0.0335	2.26186	-5.1874	0.050223	hsa-miR-1243
hsa-miR-1254	0.0656	0.0336	-2.26012	-5.1908	-0.057441	hsa-miR-1254
hsa-miR-517a	0.0678	0.0348	2.24397	-5.2218	0.051365	hsa-miR-517a
hsa-miR-124*	0.0682	0.0351	-2.24007	-5.2292	-0.056444	hsa-miR-124*
hsa-miR-216a	0.069	0.0356	-2.23271	-5.2433	-0.135058	hsa-miR-216a
hsa-miR-581	0.069	0.0356	2.2322	-5.2443	0.038235	hsa-miR-581
hsa-miR-520h	0.069	0.0357	2.23184	-5.245	0.05835	hsa-miR-520h
hsa-miR-1909*	0.0709	0.0367	-2.21806	-5.2712	-0.069494	hsa-miR-1909*
hsa-miR-1227	0.071	0.0369	2.21552	-5.276	0.207029	hsa-miR-1227
ebv-miR-BART12	0.071	0.0369	2.21507	-5.2769	0.535933	ebv-miR-BART12	NA
hsa-miR-346	0.0718	0.0375	-2.2086	-5.2892	-0.131091	hsa-miR-346
hsa-miR-521	0.0736	0.0385	2.19538	-5.3142	0.120427	hsa-miR-521
hsa-miR-301a	0.0736	0.0385	-2.19512	-5.3147	-1.04996	hsa-miR-301a
hsa-miR-921	0.0745	0.0391	-2.18834	-5.3275	-0.04558	hsa-miR-921
hsa-miR-1272	0.0746	0.0392	2.18702	-5.3299	0.047644	hsa-miR-1272
hsa-miR-590-3p	0.0755	0.0398	2.18002	-5.3431	0.076296	hsa-miR-590-3p
hsa-miR-624*	0.0757	0.0399	2.17804	-5.3468	0.055582	hsa-miR-624*
hsa-miR-555	0.0765	0.0404	2.17196	-5.3582	0.070113	hsa-miR-555
hsa-miR-10a*	0.0769	0.0407	2.16836	-5.365	0.213617	hsa-miR-10a*	NA
hsa-miR-23a*	0.0769	0.0408	-2.16771	-5.3662	-0.104285	hsa-miR-23a*
hsa-miR-99b	0.0775	0.0412	2.16304	-5.3749	0.44118	hsa-miR-99b
hsa-miR-141*	0.0778	0.0414	2.16015	-5.3803	0.025491	hsa-miR-141*
hsa-miR-186*	0.0786	0.042	2.15401	-5.3918	0.076086	hsa-miR-186*
hsa-miR-617	0.0793	0.0424	-2.1491	-5.4009	-0.077827	hsa-miR-617
hsa-miR-621	0.0795	0.0427	2.14562	-5.4074	0.040175	hsa-miR-621
hsa-miR-548i	0.0795	0.0427	2.14551	-5.4076	0.049973	hsa-miR-548i
ebv-miR-BART20-3p	0.0798	0.0429	2.14304	-5.4122	0.042177	ebv-miR-BART20-3p	NA
hsa-miR-1233	0.0804	0.0433	-2.13878	-5.4201	-0.047434	hsa-miR-1233
hsa-miR-588	0.081	0.0437	2.13404	-5.4289	0.031396	hsa-miR-588
hsa-miR-412	0.0818	0.0443	2.12805	-5.44	0.039884	hsa-miR-412
hsa-miR-185*	0.0829	0.045	2.12073	-5.4535	0.076619	hsa-miR-185*
hsa-miR-218-2*	0.0833	0.0453	2.11749	-5.4595	0.040227	hsa-miR-218-2*
hsa-miR-767-5p	0.084	0.0457	2.11234	-5.469	0.134818	hsa-miR-767-5p
hsa-miR-647	0.0847	0.0462	2.10749	-5.4779	0.078545	hsa-miR-647
miRNABrightCorner30	0.0847	0.0463	2.10658	-5.4796	0.719959		control
hsa-miR-449b	0.0852	0.0466	2.10289	-5.4863	0.045504	hsa-miR-449b
hsa-miR-1911	0.0854	0.0468	2.10098	-5.4898	0.041193	hsa-miR-1911
hsa-miR-483-3p	0.0873	0.0481	2.08759	-5.5143	0.204052	hsa-miR-483-3p
hsa-miR-297	0.0873	0.0481	2.08732	-5.5148	0.051052	hsa-miR-297
hsa-miR-640	0.0873	0.0481	2.08732	-5.5148	0.060092	hsa-miR-640
hsa-miR-554	0.0902	0.0499	2.07023	-5.546	0.034179	hsa-miR-554
hsa-miR-506	0.0905	0.0501	2.06794	-5.5501	0.058547	hsa-miR-506
hcmv-miR-US25-1*	0.0912	0.0506	2.0632	-5.5587	0.032662	hcmv-miR-US25-1*	NA
hsa-miR-192*	0.0924	0.0514	2.05531	-5.573	0.070239	hsa-miR-192*
hsa-miR-661	0.0924	0.0514	2.05478	-5.5739	0.063537	hsa-miR-661
hsa-miR-10b*	0.0924	0.0516	-2.05369	-5.5759	-0.109511	hsa-miR-10b*	NA
hsa-miR-556-5p	0.0936	0.0523	2.04676	-5.5884	0.03926	hsa-miR-556-5p
hsa-miR-450b-5p	0.0964	0.054	2.03102	-5.6167	0.040899	hsa-miR-450b-5p
hsa-miR-937	0.0964	0.0541	2.03002	-5.6185	0.099143	hsa-miR-937
hsa-miR-185	0.0967	0.0544	-2.02736	-5.6232	-0.578814	hsa-miR-185
hsa-miR-30d*	0.0967	0.0545	2.02668	-5.6244	0.088543	hsa-miR-30d*
hsa-miR-664	0.0968	0.0546	2.02541	-5.6267	0.22913	hsa-miR-664
hsa-miR-1284	0.0986	0.0557	2.01522	-5.6449	0.055486	hsa-miR-1284
hsa-miR-132	0.0992	0.0561	-2.01154	-5.6515	-0.517848	hsa-miR-132
hsa-miR-138-2*	0.0994	0.0563	2.00975	-5.6546	0.072814	hsa-miR-138-2*
hsa-miR-873	0.0996	0.0566	-2.00763	-5.6584	-0.125766	hsa-miR-873
hsa-miR-1261	0.0998	0.0568	2.00565	-5.6619	0.037792	hsa-miR-1261
hsa-miR-30d	0.101	0.0574	-2.00029	-5.6714	-0.35638	hsa-miR-30d
hsa-miR-378	0.101	0.0578	1.9974	-5.6765	0.864068	hsa-miR-378
hsa-miR-1203	0.104	0.0595	-1.98249	-5.7029	-0.048788	hsa-miR-1203
hsa-miR-1205	0.105	0.0604	1.97534	-5.7155	0.037672	hsa-miR-1205
hsa-miR-1224-3p	0.106	0.0607	1.97287	-5.7198	0.063709	hsa-miR-1224-3p
hsa-miR-1468	0.106	0.0609	1.97094	-5.7232	0.03834	hsa-miR-1468
hsa-miR-374b	0.107	0.0619	1.96264	-5.7377	0.493073	hsa-miR-374b
hsa-miR-423-3p	0.112	0.0646	1.94149	-5.7746	0.084186	hsa-miR-423-3p
hsa-miR-513a-5p	0.113	0.0654	-1.93508	-5.7857	-0.452173	hsa-miR-513a-5p
hsa-miR-30a*	0.113	0.0655	1.93387	-5.7878	0.671145	hsa-miR-30a*
hsa-miR-1276	0.114	0.0663	-1.92831	-5.7974	-0.045896	hsa-miR-1276
ebv-miR-BART9*	0.115	0.0667	1.92504	-5.803	0.045633	ebv-miR-BART9*	NA
ebv-miR-BHRF1-1	0.115	0.0671	-1.92172	-5.8088	-0.033913	ebv-miR-BHRF1-1	NA
hsa-miR-744*	0.115	0.0673	1.92051	-5.8108	0.096001	hsa-miR-744*
hsa-miR-1253	0.116	0.0678	1.91666	-5.8175	0.036469	hsa-miR-1253
hsa-miR-587	0.12	0.0705	1.89663	-5.8518	0.036654	hsa-miR-587
hsa-let-7i*	0.12	0.0708	1.89457	-5.8553	0.083465	hsa-let-7i*	NA
hsa-miR-33b*	0.12	0.0708	1.89443	-5.8555	0.114667	hsa-miR-33b*
hsa-miR-133b	0.122	0.0719	-1.88704	-5.8681	-0.15928	hsa-miR-133b
ebv-miR-BART2-3p	0.122	0.072	1.88602	-5.8698	0.049986	ebv-miR-BART2-3p	NA
hsa-miR-328	0.124	0.0731	-1.87823	-5.883	-0.218352	hsa-miR-328
hsa-miR-34c-5p	0.125	0.0742	-1.87063	-5.8959	-0.337468	hsa-miR-34c-5p
hcmv-miR-UL112	0.128	0.076	-1.85853	-5.9163	-0.030331	hcmv-miR-UL112	NA
hsa-miR-611	0.129	0.0767	1.85372	-5.9244	0.040379	hsa-miR-611
hsa-miR-331-5p	0.129	0.077	1.85122	-5.9286	0.025836	hsa-miR-331-5p
hsa-miR-363*	0.131	0.0784	1.84234	-5.9434	0.039786	hsa-miR-363*
hsa-let-7d	0.132	0.0787	-1.84021	-5.947	-0.673967	hsa-let-7d	NA
hsa-miR-649	0.132	0.0792	1.83687	-5.9525	0.0463	hsa-miR-649
hsa-miR-337-3p	0.133	0.0797	1.83357	-5.958	0.245283	hsa-miR-337-3p
hsa-miR-502-5p	0.134	0.0804	1.82908	-5.9655	0.120006	hsa-miR-502-5p
hsa-miR-214*	0.134	0.0805	1.82833	-5.9667	0.375328	hsa-miR-214*
ebv-miR-BART5	0.134	0.081	1.82517	-5.972	0.035152	ebv-miR-BART5	NA
hsa-miR-632	0.134	0.081	1.82508	-5.9721	0.024213	hsa-miR-632
hsa-miR-197	0.135	0.0816	1.82107	-5.9788	0.255119	hsa-miR-197
hsa-miR-106b	0.137	0.0831	1.81195	-5.9939	0.664591	hsa-miR-106b	NA
hsa-miR-662	0.14	0.0847	-1.8017	-6.0107	-0.061917	hsa-miR-662
hsa-miR-548l	0.141	0.0857	1.79575	-6.0205	0.049254	hsa-miR-548l
kshv-miR-K12-3	0.143	0.0869	-1.78866	-6.0321	-0.528623	kshv-miR-K12-3
hsa-miR-129*	0.144	0.0877	-1.78376	-6.0401	-0.22462	hsa-miR-129*
hsa-miR-641	0.145	0.0889	1.77677	-6.0515	0.074974	hsa-miR-641
hsa-miR-32*	0.146	0.0895	1.77286	-6.0578	0.093471	hsa-miR-32*
hsa-miR-1275	0.147	0.0902	-1.76885	-6.0643	-0.459129	hsa-miR-1275
hsa-miR-1914	0.151	0.0928	1.75365	-6.0889	0.078537	hsa-miR-1914
hsa-miR-602	0.151	0.093	1.75279	-6.0903	0.127324	hsa-miR-602
hsa-miR-514	0.152	0.0938	1.74831	-6.0975	0.029452	hsa-miR-514
hsa-miR-200c	0.153	0.0946	-1.74348	-6.1052	-0.196941	hsa-miR-200c
hsa-miR-130b*	0.153	0.0948	1.74271	-6.1064	0.105863	hsa-miR-130b*
hsa-miR-452	0.154	0.0952	-1.74003	-6.1107	-0.091556	hsa-miR-452
hsa-miR-876-5p	0.155	0.0959	1.73612	-6.117	0.04656	hsa-miR-876-5p
hsa-miR-326	0.155	0.096	-1.73573	-6.1176	-0.070865	hsa-miR-326
hsa-miR-1909	0.155	0.0963	1.73434	-6.1198	0.026186	hsa-miR-1909
hsa-miR-1200	0.155	0.0964	1.73369	-6.1208	0.038506	hsa-miR-1200
hcmv-miR-UL70-5p	0.156	0.0973	1.72844	-6.1292	0.059529	hcmv-miR-UL70-5p	NA
hsa-miR-378*	0.156	0.0978	1.72567	-6.1336	0.223546	hsa-miR-378*
hsa-miR-28-3p	0.157	0.0983	-1.72307	-6.1378	-0.025547	hsa-miR-28-3p
hcmv-miR-US4	0.157	0.0985	-1.72203	-6.1394	-0.204419	hcmv-miR-US4	NA
hsa-miR-517*	0.157	0.0988	1.72048	-6.1419	0.028682	hsa-miR-517*
hsa-miR-501-5p	0.159	0.1	1.71378	-6.1525	0.09011	hsa-miR-501-5p
hsa-miR-371-3p	0.161	0.102	1.70434	-6.1674	0.070554	hsa-miR-371-3p
hsa-miR-331-3p	0.163	0.103	-1.69749	-6.1781	-0.34528	hsa-miR-331-3p
hsa-miR-429	0.167	0.106	1.68343	-6.2001	0.043754	hsa-miR-429
hsa-miR-23b*	0.169	0.107	1.67647	-6.211	0.042768	hsa-miR-23b*
kshv-miR-K12-1	0.171	0.108	1.67097	-6.2195	0.086188	kshv-miR-K12-1
hsa-miR-650	0.171	0.109	1.66927	-6.2221	0.041653	hsa-miR-650
hsa-miR-523	0.172	0.109	1.66588	-6.2274	0.022918	hsa-miR-523
hsa-miR-92a-2*	0.174	0.111	1.65871	-6.2385	0.113413	hsa-miR-92a-2*
hsa-miR-339-3p	0.174	0.111	-1.65528	-6.2437	-0.048741	hsa-miR-339-3p
hsa-miR-539	0.176	0.112	-1.65042	-6.2512	-0.151993	hsa-miR-539
hsa-miR-23b	0.176	0.113	-1.64865	-6.2539	-0.550673	hsa-miR-23b
hsa-miR-890	0.176	0.113	-1.64819	-6.2546	-0.041187	hsa-miR-890
hsa-miR-122*	0.176	0.113	1.64735	-6.2559	0.058345	hsa-miR-122*
hsa-miR-550*	0.176	0.114	1.64448	-6.2603	0.252723	hsa-miR-550*
hsa-miR-19b-1*	0.176	0.114	1.64417	-6.2608	0.149136	hsa-miR-19b-1*
hsa-miR-34b*	0.178	0.115	-1.63916	-6.2685	-0.622273	hsa-miR-34b*
hsa-miR-105	0.178	0.115	1.63771	-6.2707	0.083123	hsa-miR-105	NA
hsa-miR-147	0.18	0.116	1.63128	-6.2805	0.033962	hsa-miR-147
hsa-miR-25*	0.181	0.118	1.62501	-6.29	0.05681	hsa-miR-25*
hsa-miR-652	0.183	0.119	-1.61854	-6.2998	-0.250536	hsa-miR-652
hsa-miR-302d*	0.184	0.12	1.61639	-6.303	0.034164	hsa-miR-302d*
hsa-miR-501-3p	0.185	0.121	-1.61213	-6.3095	-0.083215	hsa-miR-501-3p
hsa-miR-567	0.187	0.122	1.60513	-6.32	0.025885	hsa-miR-567
hsa-miR-552	0.188	0.123	1.60196	-6.3248	0.035106	hsa-miR-552
ebv-miR-BART4	0.188	0.123	1.59988	-6.3279	0.031299	ebv-miR-BART4	NA
ebv-miR-BART6-3p	0.188	0.124	1.59886	-6.3294	0.027564	ebv-miR-BART6-3p	NA
hsa-miR-106a*	0.188	0.124	1.59768	-6.3312	0.115545	hsa-miR-106a*	NA
hsa-miR-1322	0.188	0.124	1.59598	-6.3337	0.032652	hsa-miR-1322
hsa-miR-27a	0.19	0.125	1.59059	-6.3418	0.66614	hsa-miR-27a
hsa-miR-361-5p	0.194	0.128	1.57731	-6.3615	0.386128	hsa-miR-361-5p
hsa-let-7e	0.197	0.13	-1.56991	-6.3724	-0.326423	hsa-let-7e	NA
hsa-miR-1258	0.199	0.132	-1.56122	-6.3852	-0.040282	hsa-miR-1258
hsa-miR-574-3p	0.2	0.133	1.55941	-6.3879	0.430947	hsa-miR-574-3p
hsa-miR-18b	0.2	0.133	1.55695	-6.3915	0.655248	hsa-miR-18b
hsa-miR-200c*	0.203	0.136	1.54707	-6.4059	0.033497	hsa-miR-200c*
ebv-miR-BART2-5p	0.207	0.138	1.53698	-6.4206	0.043045	ebv-miR-BART2-5p	NA
hsa-miR-219-1-3p	0.207	0.138	1.53501	-6.4235	0.026567	hsa-miR-219-1-3p
hsa-miR-1197	0.208	0.139	1.53307	-6.4263	0.027048	hsa-miR-1197
hsa-miR-940	0.209	0.14	-1.52915	-6.4319	-0.285447	hsa-miR-940
kshv-miR-K12-3*	0.211	0.141	1.52275	-6.4412	0.03666	kshv-miR-K12-3*
ebv-miR-BART19-3p	0.213	0.143	-1.51535	-6.4518	-0.362808	ebv-miR-BART19-3p	NA
hsa-miR-675	0.218	0.146	-1.50305	-6.4694	-0.024664	hsa-miR-675
hsa-miR-384	0.218	0.147	1.50085	-6.4725	0.028946	hsa-miR-384
hsa-miR-137	0.218	0.147	-1.49935	-6.4746	-0.562127	hsa-miR-137
hsa-miR-16	0.218	0.148	-1.49877	-6.4755	-0.248555	hsa-miR-16
hsa-miR-495	0.218	0.148	-1.49786	-6.4768	-0.347262	hsa-miR-495
hsa-miR-1913	0.22	0.149	1.49324	-6.4833	0.044727	hsa-miR-1913
hsa-miR-627	0.22	0.15	-1.49106	-6.4864	-0.06091	hsa-miR-627
ebv-miR-BART14	0.22	0.15	1.49029	-6.4875	0.038293	ebv-miR-BART14	NA
hsa-miR-639	0.224	0.153	-1.47797	-6.5048	-0.028413	hsa-miR-639
hsa-miR-217	0.23	0.157	-1.46383	-6.5246	-0.056819	hsa-miR-217
hcmv-miR-US33-5p	0.231	0.158	-1.45923	-6.531	-0.062316	hcmv-miR-US33-5p	NA
hsa-miR-206	0.231	0.158	-1.45837	-6.5322	-0.049495	hsa-miR-206
hsa-miR-376c	0.232	0.159	-1.45622	-6.5352	-0.650242	hsa-miR-376c
hsa-miR-573	0.232	0.159	1.45446	-6.5376	0.036973	hsa-miR-573
hsa-miR-149	0.235	0.162	-1.44614	-6.5492	-0.269022	hsa-miR-149
hsa-miR-432	0.236	0.163	-1.4428	-6.5538	-0.199758	hsa-miR-432
hsa-miR-1302	0.236	0.163	1.4425	-6.5542	0.03127	hsa-miR-1302
hsa-miR-1910	0.236	0.163	1.44027	-6.5572	0.044525	hsa-miR-1910
hsa-miR-491-5p	0.237	0.164	1.43762	-6.5609	0.027568	hsa-miR-491-5p
hsa-miR-220b	0.238	0.165	1.43309	-6.5671	0.026973	hsa-miR-220b
hsa-miR-377	0.238	0.165	-1.43249	-6.5679	-0.526905	hsa-miR-377
hsa-miR-1183	0.242	0.168	-1.42251	-6.5815	-0.171349	hsa-miR-1183
ebv-miR-BART16	0.243	0.169	-1.41961	-6.5855	-0.034256	ebv-miR-BART16	NA
hsa-miR-30e	0.243	0.169	-1.41921	-6.586	-0.405975	hsa-miR-30e
hsa-miR-643	0.244	0.17	1.41551	-6.591	0.021927	hsa-miR-643
hsa-miR-1296	0.247	0.173	1.40801	-6.6012	0.058343	hsa-miR-1296
hsa-miR-876-3p	0.25	0.175	-1.39822	-6.6143	-0.065782	hsa-miR-876-3p
hsa-miR-580	0.252	0.177	1.39325	-6.621	0.046724	hsa-miR-580
hsa-miR-380*	0.252	0.177	1.39223	-6.6223	0.019828	hsa-miR-380*
hsa-miR-541*	0.253	0.178	1.38847	-6.6274	0.043984	hsa-miR-541*
hsa-miR-143*	0.254	0.179	-1.38672	-6.6297	-0.059211	hsa-miR-143*
ebv-miR-BHRF1-2*	0.259	0.183	1.37362	-6.6471	0.048009	ebv-miR-BHRF1-2*	NA
hsa-miR-421	0.259	0.183	1.37336	-6.6474	0.169262	hsa-miR-421
hsa-miR-181d	0.264	0.187	-1.35968	-6.6654	-0.187285	hsa-miR-181d
hsa-miR-548h	0.265	0.188	1.35713	-6.6687	0.022301	hsa-miR-548h
hsa-miR-569	0.267	0.19	1.35177	-6.6757	0.026026	hsa-miR-569
hsv1-miR-H5	0.268	0.191	1.34799	-6.6807	0.030056	hsv1-miR-H5
hsa-miR-300	0.272	0.194	1.33886	-6.6925	0.033114	hsa-miR-300
hsa-let-7e*	0.274	0.195	1.33464	-6.6979	0.053048	hsa-let-7e*	NA
hsa-miR-941	0.276	0.197	1.32754	-6.7071	0.036095	hsa-miR-941
hsa-miR-151-5p	0.277	0.198	-1.32584	-6.7093	-0.260788	hsa-miR-151-5p
hsa-miR-502-3p	0.278	0.199	-1.32255	-6.7135	-0.130186	hsa-miR-502-3p
hsa-miR-548n	0.278	0.199	1.32151	-6.7148	0.051995	hsa-miR-548n
hsa-miR-630	0.28	0.201	-1.31621	-6.7216	-0.743783	hsa-miR-630
hsa-miR-545	0.281	0.202	-1.31228	-6.7266	-0.084836	hsa-miR-545
hsa-miR-19a	0.282	0.203	1.30991	-6.7296	0.724077	hsa-miR-19a
hsa-miR-19b	0.282	0.204	1.30882	-6.731	0.574811	hsa-miR-19b
hsa-miR-376a	0.284	0.205	-1.30472	-6.7361	-0.507165	hsa-miR-376a
hsa-miR-325	0.284	0.206	1.3023	-6.7392	0.028935	hsa-miR-325
hsa-miR-299-3p	0.284	0.206	-1.30183	-6.7398	-0.08945	hsa-miR-299-3p
hsa-miR-590-5p	0.284	0.206	1.30071	-6.7412	0.411935	hsa-miR-590-5p
hsa-miR-376b	0.284	0.206	-1.30033	-6.7417	-0.15691	hsa-miR-376b
hsa-miR-671-3p	0.285	0.207	-1.298	-6.7446	-0.025039	hsa-miR-671-3p
hsa-miR-668	0.286	0.208	1.29469	-6.7488	0.053976	hsa-miR-668
hsa-miR-34a	0.287	0.21	-1.2909	-6.7535	-0.866654	hsa-miR-34a
ebv-miR-BART3*	0.29	0.212	1.28372	-6.7625	0.043263	ebv-miR-BART3*	NA
hsa-miR-379	0.293	0.214	-1.2767	-6.7712	-0.294561	hsa-miR-379
hsa-miR-431	0.293	0.215	1.27568	-6.7725	0.08174	hsa-miR-431
hsa-miR-30a	0.297	0.218	1.26582	-6.7847	0.523401	hsa-miR-30a
hsa-miR-504	0.297	0.219	1.26506	-6.7856	0.033571	hsa-miR-504
ebv-miR-BART11-3p	0.299	0.22	1.26006	-6.7918	0.021987	ebv-miR-BART11-3p	NA
hsa-miR-155	0.303	0.223	1.25232	-6.8012	0.531108	hsa-miR-155
ebv-miR-BART17-3p	0.307	0.227	1.24173	-6.8141	0.033128	ebv-miR-BART17-3p	NA
hcmv-miR-US5-2	0.308	0.228	1.23974	-6.8165	0.027259	hcmv-miR-US5-2	NA
hsa-miR-411*	0.31	0.23	1.23352	-6.824	0.036632	hsa-miR-411*
hsa-miR-608	0.31	0.23	1.23348	-6.8241	0.019004	hsa-miR-608
hsa-miR-17*	0.314	0.233	1.22566	-6.8335	0.460107	hsa-miR-17*
hsa-miR-410	0.315	0.234	-1.22118	-6.8388	-0.351001	hsa-miR-410
hsa-miR-329	0.32	0.238	-1.212	-6.8497	-0.099288	hsa-miR-329
hsa-miR-143	0.324	0.242	-1.20216	-6.8614	-0.382645	hsa-miR-143
hsa-miR-133a	0.324	0.242	1.20072	-6.8631	0.059505	hsa-miR-133a
hsa-miR-371-5p	0.327	0.244	1.19513	-6.8696	0.212447	hsa-miR-371-5p
hsa-miR-1292	0.327	0.244	1.19479	-6.87	0.026402	hsa-miR-1292
hsa-miR-103	0.33	0.248	1.18651	-6.8797	0.33863	hsa-miR-103	NA
hsa-miR-583	0.333	0.25	-1.18054	-6.8866	-0.029966	hsa-miR-583
hcmv-miR-US25-2-5p	0.333	0.25	1.17962	-6.8877	0.029509	hcmv-miR-US25-2-5p	NA
hsa-miR-509-3p	0.333	0.25	1.17929	-6.888	0.021441	hsa-miR-509-3p
hsa-miR-708*	0.334	0.252	-1.17519	-6.8928	-0.036216	hsa-miR-708*
hsa-miR-92a-1*	0.336	0.254	1.17067	-6.898	0.048019	hsa-miR-92a-1*
hsa-miR-1304	0.341	0.258	1.16116	-6.9089	0.027463	hsa-miR-1304
hsa-miR-943	0.341	0.258	1.16018	-6.91	0.027985	hsa-miR-943
ebv-miR-BART10	0.342	0.259	1.15733	-6.9133	0.0227	ebv-miR-BART10	NA
hsa-miR-214	0.344	0.261	1.15251	-6.9187	0.857795	hsa-miR-214
hsa-miR-1915*	0.344	0.261	-1.15241	-6.9188	-0.027027	hsa-miR-1915*
hsa-miR-22	0.344	0.262	-1.15097	-6.9205	-0.446953	hsa-miR-22
hsa-miR-660	0.345	0.263	-1.14744	-6.9245	-0.314151	hsa-miR-660
hsa-miR-1915	0.345	0.263	-1.14693	-6.925	-0.345253	hsa-miR-1915
hsa-miR-550	0.351	0.268	1.13517	-6.9383	0.065633	hsa-miR-550
hsa-miR-27b*	0.351	0.269	1.13361	-6.94	0.024167	hsa-miR-27b*
hsa-miR-147b	0.352	0.27	1.13095	-6.943	0.019902	hsa-miR-147b
hsa-miR-519e*	0.353	0.271	-1.12791	-6.9464	-0.021648	hsa-miR-519e*
hsa-miR-409-3p	0.358	0.275	1.11831	-6.957	0.29451	hsa-miR-409-3p
kshv-miR-K12-10b	0.366	0.281	-1.10302	-6.9738	-0.046738	kshv-miR-K12-10b
hsa-miR-584	0.37	0.285	-1.09497	-6.9825	-0.191981	hsa-miR-584
hsa-miR-582-3p	0.377	0.291	1.08127	-6.9973	0.017563	hsa-miR-582-3p
kshv-miR-K12-5	0.377	0.291	1.0812	-6.9973	0.031782	kshv-miR-K12-5
kshv-miR-K12-9*	0.381	0.295	1.07221	-7.0069	0.036175	kshv-miR-K12-9*
kshv-miR-K12-6-3p	0.384	0.297	1.06622	-7.0133	0.017964	kshv-miR-K12-6-3p
hsa-miR-635	0.387	0.3	1.06012	-7.0197	0.016625	hsa-miR-635
hsa-miR-220c	0.391	0.304	-1.05241	-7.0278	-0.022475	hsa-miR-220c
hsv1-miR-H3	0.396	0.308	-1.04253	-7.0381	-0.016437	hsv1-miR-H3
hsv1-miR-H2-5p	0.403	0.314	-1.02965	-7.0514	-0.032134	hsv1-miR-H2-5p
hsa-miR-208a	0.405	0.316	1.02533	-7.0558	0.0236	hsa-miR-208a
hsa-miR-877*	0.406	0.317	1.02348	-7.0577	0.094316	hsa-miR-877*
hsa-miR-625	0.408	0.319	-1.01906	-7.0622	-0.154933	hsa-miR-625
hsa-miR-199a-5p	0.41	0.321	1.01443	-7.0668	0.789368	hsa-miR-199a-5p
hsa-miR-96	0.41	0.321	1.01379	-7.0675	0.608177	hsa-miR-96
hsa-miR-1283	0.412	0.323	1.01003	-7.0713	0.028292	hsa-miR-1283
hsa-miR-34b	0.414	0.325	1.00592	-7.0754	0.059038	hsa-miR-34b
hsa-let-7g*	0.417	0.328	0.99926	-7.0821	0.028935	hsa-let-7g*	NA
hsa-miR-525-5p	0.421	0.331	-0.99249	-7.0888	-0.028328	hsa-miR-525-5p
hsa-miR-548f	0.423	0.334	0.98739	-7.0938	0.036437	hsa-miR-548f
hsa-miR-338-5p	0.429	0.339	-0.97618	-7.1048	-0.02278	hsa-miR-338-5p
hsa-miR-885-3p	0.429	0.339	-0.97617	-7.1048	-0.035681	hsa-miR-885-3p
hsa-miR-758	0.434	0.343	-0.96765	-7.1131	-0.136327	hsa-miR-758
hsa-miR-141	0.435	0.345	-0.96475	-7.1159	-0.173038	hsa-miR-141
hsa-miR-508-5p	0.44	0.349	0.95532	-7.125	0.0129	hsa-miR-508-5p
hsa-miR-576-3p	0.44	0.35	0.95411	-7.1261	0.036721	hsa-miR-576-3p
hsa-miR-886-5p	0.442	0.352	0.9499	-7.1301	0.023202	hsa-miR-886-5p
hsa-miR-485-3p	0.448	0.357	-0.94032	-7.1392	-0.079106	hsa-miR-485-3p
hsa-miR-20b	0.448	0.358	0.93821	-7.1412	0.507537	hsa-miR-20b
hsa-miR-30c	0.453	0.362	0.92986	-7.149	0.258979	hsa-miR-30c
hsa-miR-125b-1*	0.454	0.364	-0.92703	-7.1517	-0.016046	hsa-miR-125b-1*
hsa-miR-769-5p	0.454	0.364	-0.92696	-7.1517	-0.157821	hsa-miR-769-5p
hsa-miR-542-5p	0.455	0.365	-0.92387	-7.1546	-0.125808	hsa-miR-542-5p
hsa-miR-1252	0.458	0.368	0.91915	-7.159	0.031155	hsa-miR-1252
hsa-miR-33a	0.458	0.368	-0.91787	-7.1601	-0.129628	hsa-miR-33a
hsa-miR-411	0.474	0.381	-0.89238	-7.1833	-0.088331	hsa-miR-411
hsa-miR-320d	0.48	0.387	0.88138	-7.1931	0.149314	hsa-miR-320d
hsa-miR-122	0.481	0.389	-0.8787	-7.1955	-0.101625	hsa-miR-122
hsa-miR-20b*	0.482	0.39	0.87665	-7.1973	0.01488	hsa-miR-20b*
hsa-miR-99b*	0.483	0.391	-0.87452	-7.1992	-0.02893	hsa-miR-99b*
hsv1-miR-H2-3p	0.491	0.398	-0.86125	-7.2108	-0.013843	hsv1-miR-H2-3p
hsa-miR-1912	0.492	0.4	-0.85823	-7.2134	-0.01869	hsa-miR-1912
hsa-miR-455-5p	0.498	0.405	-0.84917	-7.2212	-0.076722	hsa-miR-455-5p
hsa-miR-891a	0.498	0.405	-0.84771	-7.2225	-0.017169	hsa-miR-891a
hsa-miR-505	0.498	0.406	0.84677	-7.2233	0.173983	hsa-miR-505
hsa-miR-148b	0.501	0.409	-0.84168	-7.2276	-0.22461	hsa-miR-148b
hsa-miR-107	0.502	0.41	-0.83911	-7.2298	-0.159989	hsa-miR-107	NA
hsa-let-7i	0.507	0.415	-0.83085	-7.2368	-0.491928	hsa-let-7i	NA
hsa-miR-377*	0.509	0.417	0.82725	-7.2398	0.024288	hsa-miR-377*
hsa-miR-636	0.509	0.417	0.8261	-7.2408	0.053201	hsa-miR-636
hsa-miR-135b	0.51	0.419	-0.82273	-7.2436	-0.221838	hsa-miR-135b
hsa-miR-654-5p	0.522	0.429	-0.80434	-7.2587	-0.042301	hsa-miR-654-5p
hsa-miR-196a*	0.523	0.431	0.80119	-7.2613	0.014738	hsa-miR-196a*
hsa-miR-203	0.523	0.431	0.80077	-7.2616	0.098886	hsa-miR-203
hsa-miR-1297	0.523	0.432	0.79992	-7.2623	0.018724	hsa-miR-1297
hsa-miR-575	0.524	0.433	-0.79863	-7.2633	-0.21922	hsa-miR-575
hsa-miR-1306	0.526	0.435	0.79437	-7.2668	0.020639	hsa-miR-1306
hsa-miR-1181	0.527	0.437	-0.79123	-7.2693	-0.219249	hsa-miR-1181	NA
hsa-miR-125a-3p	0.528	0.438	0.78907	-7.271	0.15403	hsa-miR-125a-3p
hsa-miR-30c-1*	0.528	0.439	-0.78818	-7.2717	-0.02038	hsa-miR-30c-1*
hsa-miR-656	0.53	0.441	-0.78461	-7.2746	-0.027008	hsa-miR-656
hsa-miR-922	0.53	0.441	0.7837	-7.2753	0.023059	hsa-miR-922
hsa-miR-513c	0.533	0.444	-0.77843	-7.2795	-0.058951	hsa-miR-513c
hsa-miR-367	0.533	0.445	-0.77794	-7.2799	-0.220256	hsa-miR-367
hsa-miR-29b	0.54	0.452	-0.76541	-7.2897	-0.382873	hsa-miR-29b
hsa-miR-596	0.54	0.452	-0.76513	-7.2899	-0.019244	hsa-miR-596
hsa-miR-582-5p	0.545	0.456	0.75756	-7.2957	0.218218	hsa-miR-582-5p
hsa-miR-1255a	0.563	0.472	-0.73128	-7.3156	-0.026663	hsa-miR-1255a
hsa-miR-182	0.564	0.473	0.72878	-7.3175	0.101918	hsa-miR-182
hsa-miR-423-5p	0.566	0.476	0.72423	-7.3208	0.13216	hsa-miR-423-5p
hsa-miR-614	0.568	0.478	-0.72113	-7.3231	-0.011229	hsa-miR-614
hsa-miR-299-5p	0.575	0.484	0.71096	-7.3305	0.178911	hsa-miR-299-5p
hsa-miR-889	0.58	0.489	-0.70268	-7.3365	-0.022559	hsa-miR-889
hsa-miR-1827	0.58	0.49	-0.70192	-7.337	-0.02062	hsa-miR-1827
hsa-miR-1244	0.583	0.493	0.69624	-7.3411	0.019463	hsa-miR-1244
hsa-miR-138-1*	0.587	0.497	-0.68996	-7.3455	-0.010204	hsa-miR-138-1*
hsa-miR-323-5p	0.588	0.499	0.68701	-7.3476	0.011791	hsa-miR-323-5p
ebv-miR-BHRF1-2	0.588	0.499	0.68698	-7.3476	0.013139	ebv-miR-BHRF1-2	NA
hsa-miR-1323	0.592	0.503	0.6801	-7.3524	0.013984	hsa-miR-1323
hsa-miR-455-3p	0.592	0.504	0.67841	-7.3536	0.216929	hsa-miR-455-3p
hsa-miR-654-3p	0.593	0.505	0.67675	-7.3547	0.183723	hsa-miR-654-3p
ebv-miR-BART17-5p	0.597	0.51	0.66986	-7.3595	0.017087	ebv-miR-BART17-5p	NA
hsa-miR-1247	0.598	0.512	0.66648	-7.3618	0.01309	hsa-miR-1247
hsa-miR-29a	0.598	0.512	0.66567	-7.3623	0.319887	hsa-miR-29a
hsa-miR-218-1*	0.598	0.513	0.66472	-7.363	0.011149	hsa-miR-218-1*
hsa-miR-542-3p	0.598	0.513	-0.6642	-7.3633	-0.134574	hsa-miR-542-3p
hsa-miR-532-5p	0.603	0.518	0.65728	-7.368	0.172635	hsa-miR-532-5p
hsa-miR-486-3p	0.603	0.518	0.6562	-7.3687	0.065136	hsa-miR-486-3p
hsa-miR-379*	0.605	0.522	0.651	-7.3722	0.014331	hsa-miR-379*
ebv-miR-BART13*	0.605	0.522	0.65072	-7.3724	0.008719	ebv-miR-BART13*	NA
hsa-miR-513b	0.607	0.524	-0.64773	-7.3744	-0.082642	hsa-miR-513b
hsa-miR-605	0.608	0.525	0.6458	-7.3756	0.027995	hsa-miR-605
hsa-miR-520e	0.609	0.527	0.64257	-7.3778	0.019129	hsa-miR-520e
hsa-miR-324-5p	0.61	0.528	-0.64119	-7.3787	-0.249473	hsa-miR-324-5p
hsa-miR-545*	0.618	0.536	0.62901	-7.3866	0.018093	hsa-miR-545*
hsa-miR-512-3p	0.629	0.546	-0.61287	-7.3968	-0.031959	hsa-miR-512-3p
kshv-miR-K12-2	0.633	0.55	0.60624	-7.401	0.00941	kshv-miR-K12-2
hsa-miR-27b	0.64	0.557	0.59666	-7.4069	0.167491	hsa-miR-27b
hsa-miR-452*	0.64	0.557	0.59561	-7.4075	0.012407	hsa-miR-452*
kshv-miR-K12-4-3p	0.641	0.559	0.59323	-7.409	0.00834	kshv-miR-K12-4-3p
hsa-miR-20a*	0.645	0.563	-0.58724	-7.4126	-0.12225	hsa-miR-20a*
hsa-miR-302d	0.647	0.565	-0.58339	-7.4149	-0.077013	hsa-miR-302d
hsa-miR-1251	0.656	0.575	0.56936	-7.4232	0.009605	hsa-miR-1251
hsa-miR-7	0.656	0.575	-0.56873	-7.4236	-0.216714	hsa-miR-7
hsa-miR-1229	0.659	0.578	0.56402	-7.4263	0.044727	hsa-miR-1229
hsa-miR-509-3-5p	0.661	0.581	0.56044	-7.4284	0.01057	hsa-miR-509-3-5p
hsa-miR-181a*	0.661	0.581	-0.5595	-7.4289	-0.128653	hsa-miR-181a*
hsa-miR-30b*	0.662	0.583	0.55709	-7.4303	0.038974	hsa-miR-30b*
hsa-miR-183*	0.672	0.593	-0.54262	-7.4385	-0.018439	hsa-miR-183*
hsa-miR-1286	0.674	0.595	0.53979	-7.4401	0.011314	hsa-miR-1286
hsa-miR-532-3p	0.674	0.595	0.53869	-7.4407	0.073412	hsa-miR-532-3p
hsa-miR-145	0.678	0.599	-0.53263	-7.444	-0.320034	hsa-miR-145
hsa-miR-146a	0.702	0.622	0.49965	-7.4615	0.306011	hsa-miR-146a
hsa-miR-30b	0.705	0.625	0.4958	-7.4635	0.097211	hsa-miR-30b
hsa-miR-296-3p	0.716	0.636	-0.47977	-7.4715	-0.009748	hsa-miR-296-3p
hsa-miR-935	0.723	0.642	0.47091	-7.4759	0.017024	hsa-miR-935
hsa-miR-1298	0.723	0.643	0.46994	-7.4764	0.007209	hsa-miR-1298
hsa-miR-577	0.725	0.645	-0.46634	-7.4781	-0.024817	hsa-miR-577
hsa-miR-193a-5p	0.729	0.65	0.45937	-7.4814	0.084875	hsa-miR-193a-5p
hsa-miR-518e*	0.735	0.656	-0.45162	-7.4851	-0.009641	hsa-miR-518e*
hsa-miR-127-3p	0.736	0.658	-0.44879	-7.4864	-0.183204	hsa-miR-127-3p
hsa-miR-645	0.737	0.659	-0.44694	-7.4872	-0.006878	hsa-miR-645
hcmv-miR-US25-2-3p	0.737	0.66	0.44502	-7.4881	0.011416	hcmv-miR-US25-2-3p	NA
hsa-miR-570	0.739	0.663	0.44199	-7.4895	0.009009	hsa-miR-570
hsa-miR-100	0.741	0.666	-0.43778	-7.4914	-0.2635	hsa-miR-100	NA
hsa-miR-30c-2*	0.743	0.668	0.4346	-7.4929	0.044698	hsa-miR-30c-2*
hsa-miR-497*	0.744	0.67	0.43217	-7.4939	0.008251	hsa-miR-497*
hsa-miR-372	0.749	0.675	0.42436	-7.4974	0.026018	hsa-miR-372
hsa-miR-337-5p	0.752	0.678	-0.42018	-7.4992	-0.060237	hsa-miR-337-5p
hsa-let-7d*	0.755	0.681	0.4157	-7.5012	0.038022	hsa-let-7d*	NA
hsa-miR-223*	0.767	0.694	-0.39841	-7.5084	-0.009526	hsa-miR-223*
hsa-miR-22*	0.77	0.697	0.39409	-7.5102	0.082185	hsa-miR-22*
ebv-miR-BHRF1-3	0.776	0.704	-0.38532	-7.5137	-0.011427	ebv-miR-BHRF1-3	NA
hsa-miR-218	0.784	0.711	0.37458	-7.518	0.207455	hsa-miR-218
hsa-miR-10b	0.785	0.713	0.37255	-7.5187	0.215099	hsa-miR-10b	NA
hsa-miR-301b	0.789	0.718	-0.36608	-7.5212	-0.102233	hsa-miR-301b
hsv1-miR-H4-5p	0.789	0.718	-0.36544	-7.5215	-0.008073	hsv1-miR-H4-5p
hsa-miR-1270	0.789	0.72	-0.36337	-7.5222	-0.015661	hsa-miR-1270
hsa-miR-629	0.791	0.722	0.35994	-7.5235	0.018472	hsa-miR-629
hsa-miR-373	0.795	0.727	-0.35397	-7.5257	-0.014151	hsa-miR-373
hsa-miR-1231	0.795	0.727	0.35366	-7.5258	0.007495	hsa-miR-1231
hsa-miR-520a-5p	0.795	0.728	0.35213	-7.5264	0.008942	hsa-miR-520a-5p
hsa-miR-543	0.796	0.73	-0.34954	-7.5273	-0.040397	hsa-miR-543
hsa-miR-28-5p	0.796	0.731	-0.34848	-7.5277	-0.055707	hsa-miR-28-5p
hsa-miR-875-3p	0.797	0.732	0.34685	-7.5283	0.0074	hsa-miR-875-3p
hsa-miR-1268	0.801	0.737	-0.3404	-7.5306	-0.107951	hsa-miR-1268
hsa-miR-1250	0.802	0.738	-0.33804	-7.5314	-0.005805	hsa-miR-1250
hsa-miR-518c*	0.803	0.741	-0.33501	-7.5325	-0.006658	hsa-miR-518c*
hsa-miR-1301	0.813	0.75	-0.32231	-7.5368	-0.013594	hsa-miR-1301
hsa-miR-150*	0.814	0.752	0.3199	-7.5376	0.07853	hsa-miR-150*
hsa-miR-187	0.819	0.757	-0.3125	-7.54	-0.007813	hsa-miR-187
hsa-miR-29b-2*	0.821	0.76	-0.30872	-7.5413	-0.007936	hsa-miR-29b-2*
hsa-miR-1271	0.821	0.761	-0.30759	-7.5416	-0.052232	hsa-miR-1271
hsa-miR-24-2*	0.826	0.767	0.29974	-7.5441	0.006167	hsa-miR-24-2*
ebv-miR-BART8*	0.826	0.768	0.29903	-7.5443	0.00662	ebv-miR-BART8*	NA
hsa-miR-744	0.829	0.771	-0.29409	-7.5458	-0.056366	hsa-miR-744
hsa-miR-891b	0.831	0.775	0.28983	-7.5471	0.010285	hsa-miR-891b
hsa-miR-302a	0.831	0.775	-0.2894	-7.5472	-0.049932	hsa-miR-302a
hsa-miR-33b	0.831	0.777	-0.28714	-7.5479	-0.007358	hsa-miR-33b
hsa-miR-604	0.831	0.777	-0.28632	-7.5482	-0.004736	hsa-miR-604
hsa-miR-30e*	0.831	0.778	-0.28563	-7.5484	-0.064966	hsa-miR-30e*
hsa-miR-302a*	0.832	0.78	0.28252	-7.5493	0.014294	hsa-miR-302a*
hsa-miR-1180	0.832	0.78	-0.28233	-7.5493	-0.010626	hsa-miR-1180	NA
hsa-miR-1295	0.833	0.782	0.27991	-7.55	0.00632	hsa-miR-1295
hsa-miR-130a	0.834	0.784	-0.27743	-7.5508	-0.181366	hsa-miR-130a
hsa-miR-34a*	0.834	0.785	0.2761	-7.5511	0.04714	hsa-miR-34a*
hsa-miR-574-5p	0.836	0.787	0.2733	-7.5519	0.051793	hsa-miR-574-5p
hsa-miR-154	0.839	0.791	0.26802	-7.5534	0.031025	hsa-miR-154
hiv1-miR-TAR-5p	0.843	0.796	0.26205	-7.5551	0.004283	hiv1-miR-TAR-5p	NA
hsa-miR-205	0.855	0.808	0.24612	-7.5593	0.014943	hsa-miR-205
hsa-miR-152	0.855	0.809	-0.24465	-7.5596	-0.053178	hsa-miR-152
hsa-miR-192	0.855	0.81	0.24327	-7.56	0.089107	hsa-miR-192
hsa-miR-920	0.858	0.814	-0.23824	-7.5613	-0.005383	hsa-miR-920
hsa-miR-500*	0.858	0.814	-0.23768	-7.5614	-0.02869	hsa-miR-500*
hsa-miR-520b	0.86	0.817	-0.23354	-7.5624	-0.007871	hsa-miR-520b
hsa-miR-493	0.865	0.823	-0.22672	-7.564	-0.009698	hsa-miR-493
hur_6	0.866	0.825	0.22381	-7.5647	0.057794		control
hsa-miR-362-3p	0.866	0.825	-0.22309	-7.5649	-0.043449	hsa-miR-362-3p
hsa-miR-135b*	0.866	0.827	-0.22152	-7.5652	-0.005975	hsa-miR-135b*
hsa-miR-381	0.871	0.832	0.21437	-7.5669	0.054642	hsa-miR-381
hsa-miR-494	0.881	0.842	0.20147	-7.5696	0.078935	hsa-miR-494
hsa-miR-188-3p	0.881	0.844	-0.19941	-7.5701	-0.003773	hsa-miR-188-3p
hsa-miR-1262	0.887	0.85	-0.1913	-7.5717	-0.00669	hsa-miR-1262
hsa-miR-369-5p	0.889	0.853	0.18716	-7.5725	0.017829	hsa-miR-369-5p
hsa-miR-449a	0.891	0.856	-0.18326	-7.5733	-0.013316	hsa-miR-449a
hsa-miR-675*	0.891	0.857	-0.1826	-7.5734	-0.006557	hsa-miR-675*
hsa-miR-629*	0.893	0.859	0.17924	-7.574	0.018905	hsa-miR-629*
hsa-miR-199a-3p	0.895	0.862	0.17567	-7.5747	0.165448	hsa-miR-199a-3p
hsa-miR-183	0.896	0.864	0.1726	-7.5753	0.064482	hsa-miR-183
hsa-miR-23a	0.901	0.87	0.16587	-7.5764	0.069438	hsa-miR-23a
hsa-miR-620	0.915	0.884	0.1469	-7.5795	0.006364	hsa-miR-620
hsa-miR-380	0.916	0.887	-0.14414	-7.5799	-0.004221	hsa-miR-380
hsa-miR-505*	0.921	0.892	-0.13668	-7.581	-0.012717	hsa-miR-505*
hsa-miR-335*	0.921	0.893	0.13606	-7.5811	0.050728	hsa-miR-335*
hsa-miR-1303	0.924	0.897	0.13042	-7.5819	0.002957	hsa-miR-1303
hsa-miR-154*	0.925	0.899	-0.12806	-7.5822	-0.020508	hsa-miR-154*
hsa-miR-382	0.926	0.901	0.12521	-7.5826	0.022726	hsa-miR-382
hsa-miR-194	0.926	0.902	0.12404	-7.5827	0.032161	hsa-miR-194
hsa-miR-138	0.926	0.903	0.12373	-7.5828	0.013391	hsa-miR-138
hsa-miR-148a	0.927	0.905	0.12126	-7.5831	0.066904	hsa-miR-148a
hsa-miR-518a-5p	0.929	0.908	0.11667	-7.5837	0.002025	hsa-miR-518a-5p
hsa-miR-362-5p	0.939	0.919	0.10255	-7.5853	0.025467	hsa-miR-362-5p
kshv-miR-K12-9	0.939	0.92	-0.10187	-7.5854	-0.001809	kshv-miR-K12-9
hsa-miR-658	0.941	0.922	0.09838	-7.5857	0.002288	hsa-miR-658
hsa-miR-302c	0.949	0.931	-0.08731	-7.5868	-0.008776	hsa-miR-302c
hsa-miR-450a	0.949	0.932	0.08642	-7.5869	0.017621	hsa-miR-450a
hsa-miR-1248	0.949	0.933	0.08445	-7.587	0.002166	hsa-miR-1248
hsa-miR-181a-2*	0.952	0.937	-0.0802	-7.5874	-0.01107	hsa-miR-181a-2*
hsa-miR-195*	0.955	0.941	-0.07423	-7.5879	-0.00221	hsa-miR-195*
hsa-miR-199b-5p	0.957	0.944	0.07077	-7.5881	0.038588	hsa-miR-199b-5p
hsa-miR-215	0.961	0.949	-0.06512	-7.5885	-0.018776	hsa-miR-215
hsa-miR-369-3p	0.972	0.962	0.0483	-7.5895	0.001559	hsa-miR-369-3p
ebv-miR-BART1-5p	0.972	0.962	0.04811	-7.5895	0.000788	ebv-miR-BART1-5p	NA
hsa-miR-374b*	0.972	0.963	-0.04714	-7.5896	-0.001327	hsa-miR-374b*
hsa-miR-375	0.973	0.965	-0.0447	-7.5897	-0.003283	hsa-miR-375
hsa-miR-302b	0.973	0.966	-0.04364	-7.5898	-0.005954	hsa-miR-302b
hsa-miR-1908	0.987	0.981	-0.02392	-7.5905	-0.0005	hsa-miR-1908
hsa-miR-32	0.988	0.983	-0.02213	-7.5905	-0.005072	hsa-miR-32
hsa-miR-938	0.994	0.99	-0.01277	-7.5907	-0.000236	hsa-miR-938
hsa-miR-302c*	0.996	0.993	0.00883	-7.5907	0.000136	hsa-miR-302c*
hsa-miR-145*	0.997	0.995	-0.00642	-7.5907	-0.000722	hsa-miR-145*
hsa-miR-409-5p	0.997	0.996	-0.00543	-7.5907	-0.000456	hsa-miR-409-5p
hsa-miR-541	0.999	0.999	0.00133	-7.5908	2.1e-05	hsa-miR-541

## Sheet: Up
ID	adj.P.Val	P.Value	t	B	logFC	miRNA_ID	SPOT_ID
hsa-miR-324-3p	4.4e-14	1.83e-16	20.9363	27.806	2.46528	hsa-miR-324-3p
hsa-miR-1274a	1.15e-08	1.32e-10	10.9685	14.1939	3.92713	hsa-miR-1274a
hsa-miR-1260	7.74e-08	1.53e-09	9.64262	11.6927	2.58968	hsa-miR-1260
hsa-miR-1280	1.46e-07	3.66e-09	9.19733	10.8034	1.67932	hsa-miR-1280
hsa-miR-320a	2.12e-07	5.73e-09	8.97264	10.3449	1.19468	hsa-miR-320a
hsa-miR-1305	5.73e-07	1.79e-08	8.4175	9.1835	2.12368	hsa-miR-1305
hsa-miR-31*	6.53e-07	2.18e-08	8.32414	8.9842	2.9675	hsa-miR-31*
hsa-miR-222	1.32e-06	4.79e-08	7.9523	8.1788	1.95202	hsa-miR-222
hsa-miR-31	4.37e-06	1.91e-07	7.32117	6.7701	3.10849	hsa-miR-31
ebv-miR-BART13	4.38e-06	1.96e-07	7.3097	6.744	1.3158	ebv-miR-BART13	NA
hsa-miR-720	6.99e-06	3.49e-07	7.05319	6.1564	1.73474	hsa-miR-720
hsa-miR-221	3.09e-05	2.06e-06	6.28741	4.3551	2.55071	hsa-miR-221
hsa-miR-1274b	3.94e-05	2.71e-06	6.17165	4.0772	2.35392	hsa-miR-1274b
hsa-miR-939	0.000142	1.2e-05	5.55395	2.5732	1.0059	hsa-miR-939
hsa-miR-224	0.000281	2.8e-05	5.20739	1.7173	1.39264	hsa-miR-224
hsa-miR-25	0.000377	4.12e-05	5.05153	1.3305	1.35415	hsa-miR-25
hsa-miR-193b	0.00122	0.000185	4.44714	-0.1724	1.43827	hsa-miR-193b
hsa-miR-365	0.00134	0.000206	4.40352	-0.2806	1.08572	hsa-miR-365
hsa-miR-93	0.00178	0.000311	4.23933	-0.6871	1.42976	hsa-miR-93
hsa-miR-21*	0.00442	0.00106	3.74394	-1.8995	1.90758	hsa-miR-21*
hsa-miR-196a	0.00632	0.0017	3.55122	-2.3622	1.67817	hsa-miR-196a
hsa-miR-17	0.00882	0.00268	3.36481	-2.8028	1.5594	hsa-miR-17
hiv1-miR-TAR-3p	0.00933	0.00289	3.33316	-2.8769	1.10946	hiv1-miR-TAR-3p	NA
hsa-miR-196b	0.0108	0.00347	3.25734	-3.0532	1.6334	hsa-miR-196b
hsa-miR-10a	0.0176	0.00662	2.98539	-3.6728	1.8325	hsa-miR-10a	NA
hsa-miR-886-3p	0.023	0.00929	2.83955	-3.9954	2.42157	hsa-miR-886-3p
hsa-miR-424	0.0234	0.00951	2.82966	-4.017	1.04595	hsa-miR-424
hsa-miR-1246	0.025	0.0104	2.79216	-4.0986	1.25565	hsa-miR-1246
hsa-miR-130b	0.0262	0.011	2.76721	-4.1525	1.17993	hsa-miR-130b
hsa-miR-18a	0.0427	0.02	2.50122	-4.712	1.35737	hsa-miR-18a

## Sheet: Down
ID	adj.P.Val	P.Value	t	B	logFC	miRNA_ID	SPOT_ID
hsa-miR-142-3p	4.59e-19	4.77e-22	-37.2572	40.0791	-4.82885	hsa-miR-142-3p
hsa-miR-451	1.31e-15	2.73e-18	-25.3372	31.9378	-9.43754	hsa-miR-451		The mirbase has a table and(a,b)
hsa-miR-144	1.1e-14	3.45e-17	-22.5921	29.4566	-4.23411	hsa-miR-144
hsa-miR-142-5p	1.02e-11	5.31e-14	-16.0936	22.1316	-1.35659	hsa-miR-142-5p
hsa-miR-223	2.14e-09	1.56e-11	-12.2209	16.3688	-3.14051	hsa-miR-223
hsa-miR-765	4.54e-09	4.25e-11	-11.6203	15.3475	-1.09286	hsa-miR-765
hcmv-miR-UL70-3p	1.15e-08	1.22e-10	-11.013	14.2743	-1.588	hcmv-miR-UL70-3p	NA	hcmv-miR-UL70-3p(MIMAT0003343)doesn't belong to the selected species 'Homo sapiens' but in 'Human cytomegalovirus'
hsa-miR-181c	4.33e-08	6.3e-10	-10.1095	12.5981	-1.31969	hsa-miR-181c
hsa-miR-146b-5p	4.82e-08	7.52e-10	-10.0157	12.4183	-1.57801	hsa-miR-146b-5p
hsa-miR-124	1.04e-07	2.49e-09	-9.39219	11.1957	-4.22929	hsa-miR-124		The mirbase has a table
hsa-miR-497	2e-07	5.21e-09	-9.02016	10.4424	-2.48947	hsa-miR-497
hsa-miR-144*	4.69e-07	1.42e-08	-8.52995	9.4221	-1.70907	hsa-miR-144*
hsa-miR-671-5p	5.91e-07	1.91e-08	-8.3873	9.1192	-1.06088	hsa-miR-671-5p
hsa-miR-488	8.96e-07	3.08e-08	-8.16004	8.631	-1.18517	hsa-miR-488		It has both (3p and 5p)
hsa-miR-195	1.12e-06	3.97e-08	-8.03995	8.3703	-2.75168	hsa-miR-195
hsa-miR-126	1.76e-06	6.61e-08	-7.8036	7.8516	-2.95672	hsa-miR-126
hsa-miR-219-5p	2.06e-06	7.95e-08	-7.71878	7.6636	-3.29168	hsa-miR-219-5p		the mirbase no result and also the mirpath has (a , b)
hsa-miR-9*	2.43e-06	9.62e-08	-7.63148	7.4692	-5.13027	hsa-miR-9*
hsa-miR-181a	2.99e-06	1.24e-07	-7.51445	7.207	-2.15835	hsa-miR-181a		The mirbase has a table
hsa-miR-338-3p	3.25e-06	1.38e-07	-7.46594	7.0978	-4.65638	hsa-miR-338-3p
hsa-miR-153	6.15e-06	2.88e-07	-7.13857	6.3529	-1.13022	hsa-miR-153		The mirbase has a table and no perviuse id
hsa-miR-140-5p	9.52e-06	4.95e-07	-6.90001	5.8016	-1.56907	hsa-miR-140-5p
hsa-miR-1207-5p	1.61e-05	9.2e-07	-6.63098	5.1717	-1.87828	hsa-miR-1207-5p
hsa-miR-9	1.66e-05	9.69e-07	-6.60865	5.119	-4.39267	hsa-miR-9		The mirbase has a table
hsa-miR-483-5p	2.39e-05	1.52e-06	-6.41704	4.6647	-1.28437	hsa-miR-483-5p
hsa-miR-135a	3.05e-05	2e-06	-6.29977	4.3847	-1.4143	hsa-miR-135a		The mirbase has a table
hsa-miR-1225-5p	4.51e-05	3.27e-06	-6.09254	3.8865	-1.69444	hsa-miR-1225-5p		no related pathway
hsa-miR-95	7.77e-05	6.06e-06	-5.83475	3.2609	-1.06053	hsa-miR-95		no( 3p ,5p)
hsa-miR-99a	0.000194	1.79e-05	-5.38892	2.1665	-1.53996	hsa-miR-99a
hsa-miR-101	0.000274	2.68e-05	-5.22609	1.7636	-1.85494	hsa-miR-101	NA
hsa-miR-663	0.000281	2.8e-05	-5.20832	1.7196	-1.15474	hsa-miR-663		a , b
hsa-miR-486-5p	0.000555	6.92e-05	-4.84211	0.8098	-1.2098	hsa-miR-486-5p
hsa-miR-139-5p	0.000674	8.85e-05	-4.74349	0.5644	-1.01763	hsa-miR-139-5p
hsa-miR-335	0.000674	8.91e-05	-4.74076	0.5576	-1.4568	hsa-miR-335
hsa-miR-923_v12.0	0.000976	0.00014	-4.55902	0.1056	-2.35501		hsa-miR-923_v12.0			No such entry in our database. Use a valid miRNA identifier (e.g., hsa-let-7a-5p or MIMAT0000062).
hsa-miR-219-2-3p	0.00157	0.000261	-4.31011	-0.5121	-1.14601	hsa-miR-219-2-3p		the mirbase no result and the mirpath(a , b)
hsa-miR-26b	0.00158	0.000263	-4.30569	-0.523	-1.37807	hsa-miR-26b
hsa-let-7f	0.00206	0.000378	-4.16101	-0.8804	-1.14902	hsa-let-7f	NA	The mirbase has a table
hsa-miR-129-3p	0.00236	0.000448	-4.09265	-1.0488	-1.23509	hsa-miR-129-3p
hsa-miR-125b	0.0024	0.000463	-4.07952	-1.0811	-2.07318	hsa-miR-125b		The mirbase has a table
hsa-let-7c	0.00298	0.000602	-3.97314	-1.342	-1.61738	hsa-let-7c	NA	no perviuse id
hsa-let-7a	0.00415	0.000964	-3.78333	-1.8042	-1.18094	hsa-let-7a	NA
hsa-miR-128	0.00535	0.00136	-3.64239	-2.1441	-1.5461	hsa-miR-128		The mirbase has a table and( a,b)
hsa-miR-204	0.00701	0.00196	-3.49332	-2.4998	-1.58619	hsa-miR-204
hsa-miR-340	0.00708	0.00199	-3.4878	-2.5129	-1.14056	hsa-miR-340		It has both (3p and 5p)
hsa-miR-136	0.0109	0.00351	-3.25232	-3.0649	-1.25126	hsa-miR-136
hsa-miR-551b	0.0121	0.00404	-3.19396	-3.1995	-1.42558	hsa-miR-551b
hsa-miR-363	0.013	0.0045	-3.14921	-3.3022	-1.7229	hsa-miR-363
hsa-miR-21	0.0228	0.00914	-2.84662	-3.9799	-1.56709	hsa-miR-21
